# Supplementary material
Source: PubMed Central journal article supplement (PMC7147255)
Supplement: cs9b03727_si_001.pdf [file cs9b03727_si_001.pdf]

## Supporting Information

### **Solid-state Molecular Organometallic Catalysis in Gas/Solid Flow (Flow-SMOM) as Demonstrated by Efficient Room Temperature and Pressure 1-Butene Isomerization**

Antonio J. Martínez-Martínez,<sup>a†</sup> Cameron G. Royle,<sup>a,b</sup> Samantha K. Furfari,<sup>a,b</sup> Kongkiat Suriye,<sup>c</sup> Andrew S. Weller<sup>a,b\*</sup>

<sup>a</sup> Department of Chemistry, Chemistry Research Laboratories, University of Oxford, Oxford, OX1 3TA, U. K

<sup>b</sup> Department of Chemistry, University of York, Heslington, York, YO10 5DD, U. K.

<sup>c</sup> SCG Chemicals, 1 Siam Cement Road, Bangsue, Bangkok 10800, Thailand.

†Present Address: CIQSO– Centre for Research in Sustainable Chemistry, CIQSO, University of Huelva, 21007 Huelva, Spain

Email: [andrew.weller@york.ac.uk](mailto:andrew.weller@york.ac.uk)

## Table of Contents

|                                                                                                                                                                                                 |           |
|-------------------------------------------------------------------------------------------------------------------------------------------------------------------------------------------------|-----------|
| <b>S1 Experimental Details</b> .....                                                                                                                                                            | <b>4</b>  |
| <b>S1.1 General Methods and Reagents</b> .....                                                                                                                                                  | 4         |
| <b>S1.2 Solution NMR Spectroscopic Data</b> .....                                                                                                                                               | 4         |
| <b>S1.3 Solid-State NMR Spectroscopic Data</b> .....                                                                                                                                            | 5         |
| <b>S1.4 Gas-Phase NMR Spectroscopic Data</b> .....                                                                                                                                              | 5         |
| <b>S1.5 Mass Spectrometry Data</b> .....                                                                                                                                                        | 5         |
| <b>S1.6 Scanning Electron Microscopy Data</b> .....                                                                                                                                             | 6         |
| <b>S1.7 Powder X-ray Diffraction Data</b> .....                                                                                                                                                 | 6         |
| <b>S1.8 Gas Chromatography Data</b> .....                                                                                                                                                       | 6         |
| <b>S1.9 Protocol for Gas/Solid Batch Experiments: Sample Preparation and Gas Analyses</b> .....                                                                                                 | 6         |
| <b>S1.10 Protocols for Gas/Solid Flow Experiments</b> .....                                                                                                                                     | 8         |
| <i>S1.10.1 Sample Preparation: Column Packing</i> .....                                                                                                                                         | 8         |
| <i>S1.10.2 Experimental Monitoring</i> .....                                                                                                                                                    | 9         |
| <i>S1.10.3 Typical Procedure for a Continuous Gas Flow Catalytic Experiment</i> .....                                                                                                           | 11        |
| <b>S2 X-ray Crystallography</b> .....                                                                                                                                                           | <b>13</b> |
| <b>S2.1 Crystal Structure Determinations</b> .....                                                                                                                                              | 13        |
| <b>S3 Synthetic Procedures</b> .....                                                                                                                                                            | <b>14</b> |
| <b>S3.1 Synthesis and Characterisation of Single-Crystalline [(dtbpe)Rh(NBD)][BAR<sup>F</sup><sub>4</sub>], Complex 7</b> ..                                                                    | 14        |
| <i>S3.1.1 Synthesis of [(dtbpe)RhCl]<sub>2</sub></i> .....                                                                                                                                      | 14        |
| <i>S3.1.2 Synthesis of [(dtbpe)Rh(NBD)][BAR<sup>F</sup><sub>4</sub>], Complex 7</i> .....                                                                                                       | 14        |
| <i>S3.1.3 Selected Crystallographic and Refinement Data for Complex 7</i> .....                                                                                                                 | 18        |
| <i>S3.1.4 Supplementary Analysis of the Solid-State Molecular Structure of Complex 7 by Single-Crystal X-ray Diffraction</i> .....                                                              | 18        |
| <b>S3.2 In Situ Gas/Solid Synthesis and Characterisation of [(dtbpe)Rh(NBA)][BAR<sup>F</sup><sub>4</sub>], Complex 8</b> ..                                                                     | 20        |
| <i>S3.2.1 Attempted Single Crystal X-ray Diffraction Characterisation of complex 8</i> .....                                                                                                    | 22        |
| <b>S3.3 Synthesis and Characterisation of Single-Crystalline [(dtbpe)Rh(η<sup>6</sup>-1,2-C<sub>6</sub>H<sub>4</sub>F<sub>2</sub>)][BAR<sup>F</sup><sub>4</sub>], Complex 9</b> .....           | 23        |
| <i>S3.3.1 Selected Crystallographic and Refinement Data for Complex 9</i> .....                                                                                                                 | 25        |
| <i>S3.3.2 Supplementary Analysis of the Solid-State Molecular Structure of Complex 9 by Single-Crystal X-ray Diffraction</i> .....                                                              | 26        |
| <b>S3.4 Synthesis and Characterisation of Single-Crystalline [(dtbpe)Rh(<i>butenes</i>)][BAR<sup>F</sup><sub>4</sub>] (<i>butenes</i> = 1-butene, <i>cis</i>-2-butene), Complex 10/11</b> ..... | 28        |
| <i>S3.4.1 Selected Crystallographic and Refinement Data for Complex 10/11</i> .....                                                                                                             | 35        |
| <i>S3.4.2 Supplementary Analysis of the Solid-State Molecular Structure of Complex 10/11 by Single-Crystal X-ray Diffraction</i> .....                                                          | 36        |

|                                                                                                                                                                                                                                      |           |
|--------------------------------------------------------------------------------------------------------------------------------------------------------------------------------------------------------------------------------------|-----------|
| <b>S3.5 Synthesis and Characterisation of Single-Crystalline C-Cl Activated Product [(dtbpe)Rh(<math>\mu</math>-CH<sub>2</sub>)(<math>\mu</math>-Cl)<sub>2</sub>Rh(dtbppe)][BAR<sup>F</sup><sub>4</sub>]<sub>2</sub>, Complex 12</b> | <b>37</b> |
| <i>S3.5.1 Selected Crystallographic and Refinement Data for Complex 12</i>                                                                                                                                                           | 39        |
| <i>S3.5.2 Supplementary Analysis of the Solid-State Molecular Structure of Complex 12 by Single-Crystal X-ray Diffraction</i>                                                                                                        | 40        |
| <b>S3.6 Synthesis and Characterisation of Single-Crystalline [(dtbpe)Rh(<math>\eta^4</math>-C<sub>4</sub>H<sub>6</sub>)]BAR<sup>F</sup><sub>4</sub>, Complex 13</b>                                                                  | <b>40</b> |
| <i>S3.6.1 Selected Crystallographic and Refinement Data for Complex 13</i>                                                                                                                                                           | 43        |
| <i>S3.6.2 Supplementary Analysis of the Solid-State Molecular Structure of Complex 13 by Single-Crystal X-ray Diffraction</i>                                                                                                        | 44        |
| <b>S3.7 Synthesis and Characterisation of Single-Crystalline {[(dtbpe)RhH(<math>\mu</math>-H)]<sub>2</sub>}[BAR<sup>F</sup><sub>4</sub>]<sub>2</sub>, Complex 14</b>                                                                 | <b>45</b> |
| <i>S3.7.1 Selected Crystallographic and Refinement Data for Complex 14</i>                                                                                                                                                           | 51        |
| <i>S3.7.2 Supplementary Analysis of the Solid-State Molecular Structure of Complex 14 by Single-Crystal X-ray Diffraction</i>                                                                                                        | 51        |
| <b>S4 Solid-Gas Chemistry with Single-Crystalline Molecular Organometallics, In Batch</b>                                                                                                                                            | <b>53</b> |
| <b>S4.1 Optimisation of Conditions: Solid-State Hydrogenation of Single-Crystalline Complex 7</b>                                                                                                                                    | <b>53</b> |
| <b>S4.2 Solid-Gas Catalytic Isomerisation of 1-butene</b>                                                                                                                                                                            | <b>53</b> |
| <i>S4.2.1 NMR-Scale Solid-Gas Catalytic Isomerisation of Butenes with SMOMs</i>                                                                                                                                                      | 53        |
| <i>S4.2.2 Large-Scale Batch Solid-Gas Catalytic Isomerisation of 1-butene with Complex 7</i>                                                                                                                                         | 54        |
| <b>S4.3 In Situ Solid-State NMR Studies versus X-ray Diffraction Studies 7; 8; 10/11</b>                                                                                                                                             | <b>57</b> |
| <b>S5 Solid-Gas Chemistry with Single-Crystalline Molecular Organometallics, In Flow</b>                                                                                                                                             | <b>58</b> |
| <b>S5.1 Solution-Phase NMR Characterisation of Post-Flow Material, Complex 1</b>                                                                                                                                                     | <b>58</b> |
| <b>S5.2 Solution-Phase NMR, Solid-State NMR, Mass Spectrometric, Powder X-ray Diffraction, and SEM Characterisation of Post-Flow Material, Complex 7</b>                                                                             | <b>58</b> |
| <i>S5.2.1 Mass Spectrometry</i>                                                                                                                                                                                                      | 58        |
| <i>S5.2.2 Solution-Phase <sup>31</sup>P{<sup>1</sup>H} NMR Spectroscopy</i>                                                                                                                                                          | 58        |
| <i>S5.2.3 Solid-State <sup>31</sup>P{<sup>1</sup>H} NMR Spectroscopy</i>                                                                                                                                                             | 59        |
| <i>S5.2.4 Powder X-ray Diffraction</i>                                                                                                                                                                                               | 60        |
| <i>S5.2.5 Scanning Electron Microscopy</i>                                                                                                                                                                                           | 62        |
| <b>S5.3 Continuous Flow Data: 1-Butene Isomerisation Catalysis by Complex 7 (90+ Hours on Stream)</b>                                                                                                                                | <b>65</b> |
| <b>S5.4 Reproducibility Studies Under Continuous Flow Conditions, Complex 1</b>                                                                                                                                                      | <b>65</b> |
| <b>S5.5 Particle Size Studies Under Continuous Flow Conditions, Complex 1</b>                                                                                                                                                        | <b>66</b> |
| <b>S6 References</b>                                                                                                                                                                                                                 | <b>67</b> |

## S1 Experimental Details

### S1.1 General Methods and Reagents

All manipulations, unless otherwise stated, were performed under an atmosphere of argon using standard Schlenk techniques on a dual vacuum/inlet manifold or by employment of an MBraun glovebox. Evacuation refers to a pressure equal or lower than  $1 \times 10^{-2}$  mbar, measured with a vacuum gauge and display fitted to a Schlenk line. Glassware was dried in an oven at 130 °C overnight prior to use.

*n*-pentane, *n*-hexane, and  $\text{CH}_2\text{Cl}_2$  were dried using an MBraun SPS-800 solvent purification system and degassed by three freeze-pump-thaw cycles.  $\text{CD}_2\text{Cl}_2$  was dried by stirring over  $\text{CaH}_2$  overnight before vacuum distillation, degassed by three freeze-pump-thaw cycles and stored over activated molecular sieves (3 Å). 1,2-difluorobenzene and fluorobenzene were stirred over  $\text{Al}_2\text{O}_3$  for two hours before stirring over  $\text{CaH}_2$  overnight, vacuum distillation, and subsequent three-fold freeze-pump-thawing.  $\text{CD}_3\text{CN}$  was distilled over a small amount of  $\text{P}_2\text{O}_5$  before subsequent three-fold freeze-pump-thawing. 2,5-norbornadine (bicyclo[2.2.1]hepta-2,5-diene, NBD) was purchased from Sigma-Aldrich, distilled over freshly cut small pieces of sodium metal before subsequent three-fold freeze-pump thawing. Neat 1-butene and isobutene were supplied by CK Special Gases Ltd. (UK) and used as received. *Cis*-2-butene and *trans*-2-butene (2% balanced with  $\text{N}_2$ ) were supplied by Air Liquide (UK) and used as received. High purity hydrogen gas ( $\geq 99.9\%$ ) was employed in the gas/solid and gas/solution transformations. All other chemicals were purchased from commercial sources and used as received.  $\text{RhCl}_3 \cdot (\text{H}_2\text{O})_n$  was purchased from Precious Metals Online PMO Pty Ltd and used as received. Complexes **1**, **2**, **4**, **5**,<sup>123</sup>  $[(\text{COD})\text{RhCl}]_2$ ,<sup>4</sup> and 1,2-bis(di-*tert*-butylphosphino)ethane (*dtbpe*)<sup>5</sup> were synthesised according to pre-existing procedures.  $\text{Na}[\text{BAR}^{\text{F}}_4]$  was prepared according to an improved synthetic protocol.<sup>6</sup>

Elemental microanalyses were all carried out by Dr Stephen Boyer of London Metropolitan University.

### S1.2 Solution NMR Spectroscopic Data

Solution NMR data were collected on either a Bruker Avance III NMR spectrometer (equipped with a 11.75 T magnet) or a Bruker Avance III HD nanobay NMR spectrometer (equipped with a 9.4 T magnet) at the specified temperatures. The temperature for NMR experiments was externally calibrated to observe the chemical-shift separation between the OH and  $\text{CH}_3$  resonances in methanol. Non-deuterated solvents and gas-phase samples were locked to standard external neat  $\text{CD}_2\text{Cl}_2$  or 10% fluorobenzene in  $\text{C}_6\text{D}_6$  sample solutions.  $^{31}\text{P}\{^1\text{H}\}$  NMR spectra were referenced externally to 85%  $\text{H}_3\text{PO}_4$  in  $\text{D}_2\text{O}$ . All chemical shifts ( $\delta$ ) are quoted in ppm and coupling constants ( $J$ ) in Hz. In general, solution  $^{19}\text{F}$  and  $^{11}\text{B}$  NMR resonances for all the compounds reported are not represented pictorially since they comprise of a single resonance at  $\delta_{\text{F}} = -62.9$  ppm and  $\delta_{\text{B}} = -6.6$  ppm respectively, corresponding the  $[\text{BAR}^{\text{F}}_4]^-$  anion.

Spin simulations were conducted using MestReNova's built-in spin simulation facility (version 11.0.2-18153, © 2016 Mestrelab Research S.L.).

### S1.3 Solid-State NMR Spectroscopic Data

Solid-state NMR samples were prepared in an argon-filled glovebox, by pre-loading *c.* 35 mg of the crushed crystalline sample in question into a 4.0 or 3.2 mm zirconia solid-state rotor. The custom glassware used for *in situ* solid-gas transformations inspected *via* solid-state NMR has been detailed elsewhere.<sup>2</sup>

Solid-state NMR spectra were obtained on a Bruker Avance III HD spectrometer equipped with a 9.4 T magnet, operating at 100.56 MHz (<sup>13</sup>C) or 161.89 MHz (<sup>31</sup>P), with a MAS rate ( $\nu$ ) of 10 kHz. For <sup>13</sup>C{<sup>1</sup>H} CP/MAS SSNMR a sequence with a variable X-amplitude spin-lock pulse<sup>7</sup> and spinal64 proton decoupling was used. 4500 transients were acquired using a contact time of 2.5 ms, an acquisition time of 25 ms (2048 data points zero-filled to 32 K) and a recycle delay of 2.0 s. All <sup>13</sup>C{<sup>1</sup>H} spectra were referenced to adamantane where the upfield methane resonance was taken to be  $\delta_c = 29.5$  ppm<sup>8</sup> on a scale secondarily referenced to  $\delta_c(\text{SiMe}_4) = 0.0$  ppm. Relaxation times for <sup>1</sup>H and contact time for <sup>31</sup>P{<sup>1</sup>H} CP/MAS, <sup>13</sup>C{<sup>1</sup>H} CP/MAS, and FSLG-HETCOR NMR experiments were optimised for each compound as appropriate. The temperature for variable temperature NMR experiments at low temperatures was calibrated externally using PbNO<sub>3</sub>.

### S1.4 Gas-Phase NMR Spectroscopic Data

Gas phase <sup>1</sup>H NMR spectra were obtained using either a Bruker Avance III NMR spectrometer (equipped with a 11.75 T magnet) or a Bruker Avance III HD nanobay NMR spectrometer (equipped with a 9.4 T magnet) at room temperature and referenced to reported gas phase data for methane with  $T_1 = 1.0$  s.<sup>9</sup> Pressurisation of medium wall NMR tubes (2 mL) fitted with a controlled atmosphere PTFE (polytetrafluorethylene, Teflon) valve using the appropriate gaseous substrate was achieved by evacuation and backfilling at the appropriate pressure using custom glassware detailed in previous work.<sup>2</sup> The spectrometer was pre-locked and pre-shimmed to a separate sample of 10% fluorobenzene in C<sub>6</sub>D<sub>6</sub> solutions before NMR study of the gaseous NMR sample.

### S1.5 Mass Spectrometry Data

Electrospray ionisation mass spectrometry (ESI-MS) was carried out using a Bruker MicrOTOF instrument directly connected to a modified Innovative Technology glovebox.<sup>10</sup> The spectrometer was calibrated using a mixture of tetra alkyl ammonium bromides [N(C<sub>n</sub>H<sub>2n+1</sub>)<sub>4</sub>]Br ( $n = 2-8, 12, 16,$  and  $18$ ). Samples were diluted to a concentration of at most  $10^{-6}$  mol dm<sup>-3</sup> before mass spectrometry. Samples were typically acquired with a 4  $\mu\text{L min}^{-1}$  flow rate, a 0.4 bar nebuliser gas pressure, a flow of argon at 333 K with a 4 L min<sup>-1</sup> flow rate to act as a drying gas, a capillary voltage of 4.5 kV, and an exit voltage of 60 V.

### **S1.6 Scanning Electron Microscopy Data**

Scanning electron microscopy (SEM) was performed using a Carl Zeiss Merlin-Analytical instrument, with an operating voltage of 3.0 kV, and carried out by Dr Dana-Georgiana Crivoi. The samples were prepared by adding the material directly on the carbon tape, under an atmosphere of argon. The samples were analysed without metal or carbon coating. Energy dispersive X-ray spectroscopy (EDX) was carried out on a Carl Zeiss Merlin-Analytical instrument with an operating voltage of 3.0 kV.

### **S1.7 Powder X-ray Diffraction Data**

Powder X-ray diffraction data were collected on a PANAnalytical X'Pert Pro Diffractometer in scanning mode using Cu K $\alpha$  radiation ( $\alpha_1 = 1.540598 \text{ \AA}$ ,  $\alpha_2 = 1.54426 \text{ \AA}$ , weighted average =  $1.541847 \text{ \AA}$ ). Scans were recorded between  $2\theta = 3.0 - 80^\circ$ , with step size  $0.017^\circ$  and scan step time 26.67 s. The samples were mounted on stainless steel holders that gave rise to peaks at  $2\theta = 43.36, 44.29, \text{ and } 50.51^\circ$  (these did not interfere with the analysis).

### **S1.8 Gas Chromatography Data**

Analyses by gas chromatography for the alkene gas mixtures (either from batch or flow experiment) were performed using a Shimadzu GC-2014 gas chromatograph equipped with a Flame Ionization Detector (FID) and a Restek alumina (BOND MAPD) capillary column ( $50 \text{ m} \times 0.53 \text{ mm} \times 10.0 \text{ }\mu\text{m}$ ) using a gas sampling loop ( $50 \text{ }\mu\text{L}$ ). To obtain gaseous sample aliquots, the loop was opened for a period of 60 seconds, and the contents passed *via* the Restek alumina column at a constant temperature of  $80^\circ\text{C}$  (oven operating temperature), 87.4 operating pressure,  $9.57 \text{ mL min}^{-1}$  operating flow rate, and 60.0 split ratio. Hydrogen and helium were passed through an on-stream oxygen and moisture trap. Sampling from catalytic runs under flow conditions were done by injection of a gas aliquot ( $50 \text{ }\mu\text{L}$ ) onto the gas chromatograph using an automated gas sampling valve every 15 min. Gas flow rates are reported as measured at 298 K and atmospheric pressure. External calibration using unique butene samples proved comparable GC response factors for the butenes analysed in this study with reproducible GC traces.

### **S1.9 Protocol for Gas/Solid Batch Experiments: Sample Preparation and Gas Analyses**

Gas samples from batch experiments corresponding to neat gas reagents and/or gas mixtures were diluted to an approximately 100-fold with argon gas before being analysed by gas chromatography using a custom glassware heavy wall ampoule ( $V \sim 50 \text{ ml}$ ) fitted with tubing/Teflon valves (*Figure S1*). The ampoule was fitted with a medium wall NMR tube with a controlled atmosphere Teflon valve ( $2 \text{ mL}$ ), containing the gas sample to be analysed, using the tubing adaptor. With the valve on the NMR tube closed at first, the ampoule was evacuated and filled with argon gas to a pressure of 1.5 bar and closed. Then, the ampoule was half-submerged in liquid nitrogen and the NMR tube was opened for 5 min allowing the gas mixture to condense inside the half-submerged ampoule. At this point, the NMR tube gas

closed, and the ampoule was warmed up to room temperature to give an approximately 100-fold dilution of the gas mixture balanced with argon. At this point, the gas mixture was sufficiently diluted for adequate analyses by gas chromatography. The ampoule containing the diluted gas mixture was then fitted to the sampling valve from the chromatograph, using the tubing adaptor. An aliquot of 50  $\mu\text{L}$  was then injected using the automated sampling valve and analysed by gas chromatography as described before. This protocol proved to give reproducible and consistent results.

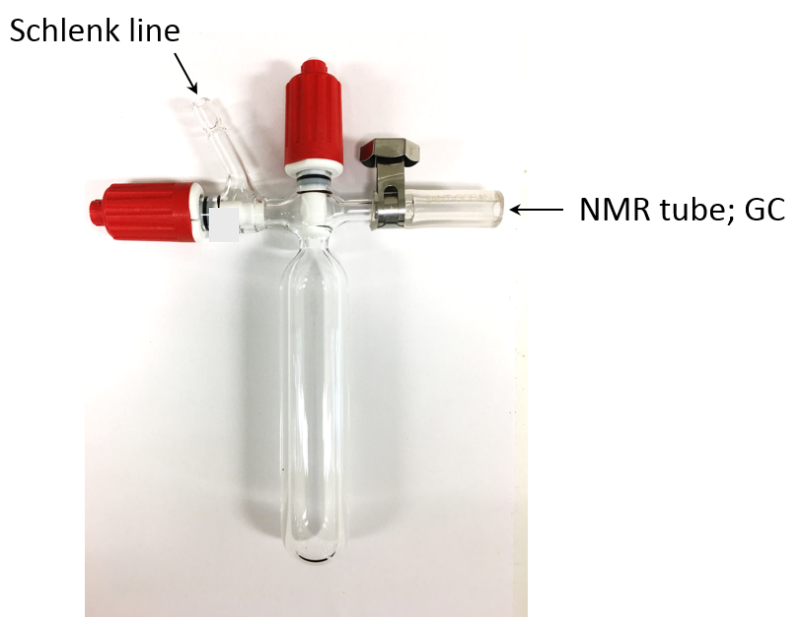

Figure S1: Custom ampoule ( $V \sim 50 \text{ ml}$ ) employed for gaseous sample dilution prior to GC analysis from batch experiments.

## S1.10 Protocols for Gas/Solid Flow Experiments

Samples were prepared by loading an appropriate amount of each catalyst/pre-catalyst supported with inert glass wool inside a stainless-steel column (thickness 6.35 mm, internal diameter 4.0 mm, and length 20.0 cm, *Figure S2*), using a glovebox under an argon atmosphere. The inert glass wool support prevented the catalyst from dislodging from the column and improved the dispersion of the catalyst.

### S1.10.1 Sample Preparation: Column Packing

The catalyst or pre-catalyst was crushed in a sample vial and then filtered through a 150 micron Endecott sieves. The fine powder was then grounded further in a glass vial. An initial plug of glass wool (~100 mg) was compacted within the column using a metal rod and then moved back up the column by approximately 2 cm (*Figure S3, A*). A small amount of glass wool (~30 mg) was placed at the top of the column and the powder was added to the glass wool at the top of the column (*Figure S3, B*) which was then compacted lightly on top of the initial glass wool plug (*Figure S3, C*). This was repeated 5-7 (*B-C*) times depending on the catalyst loading (*Figure S3, D*). Once the column was charged with the supported catalyst/pre-catalyst, it was sealed using the two-way Swagelok gas-tight valves, fitted at each end (*Figure S2*).

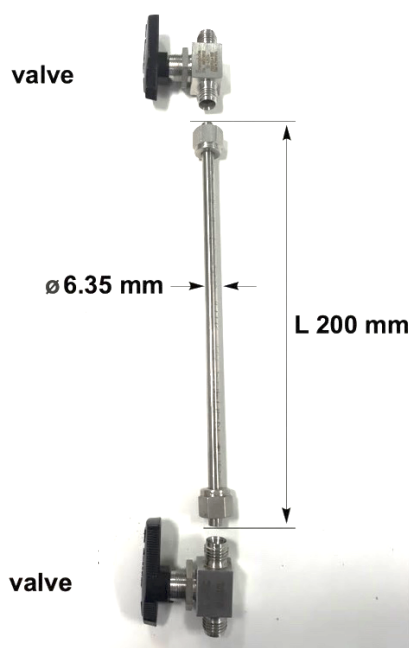

*Figure S2: Stainless steel column fitted with gas-tight valves where either the catalyst or pre-catalyst were charged before the catalytic runs under continuous gas flow conditions. This column was fitted to the continuous gas flow reactor using the upper and lower gas-tight two-way Swagelok valves (Figure S4, A).*



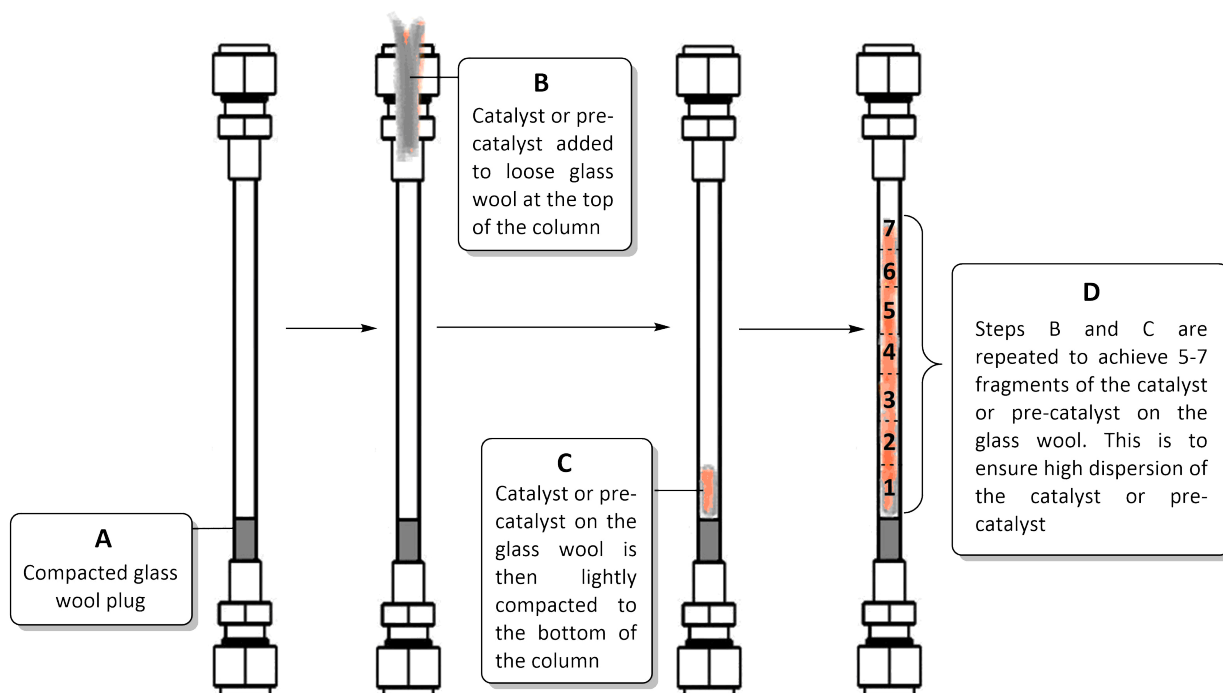

Figure S3: Packing of the stainless steel column loaded with either the catalyst or pre-catalyst catalytic runs under continuous gas flow conditions. The initial glass wool plug (A) followed by the addition of the catalyst or pre-catalyst on glass wool at the top of the column (B). The sample is then lightly compacted (C) and repeated in small fragments (D) to pack the column with the desired amount of catalyst or pre-catalyst.

### S1.10.2 Experimental Monitoring

The pre-loaded column was then fitted to a bespoke continuous gas reactor using the Swagelok valves. Gas flow into the column (Figure S4, A) was controlled with a Brooks Delta Smart II mass-flow meters setup (Figure S5). Gas flow out of the column, charged with the corresponding catalyst or pre-catalyst, passed through a loop fitted with a pressure regulator (permitting column pressurisation to  $\leq 2$  bar; Figure S4, B). Gas aliquots were sampled and analysed every 15 minutes by gas chromatography as described above. Flow rates passing through the loop and thereafter vented were confirmed using an Ellutia 7000 flowmeter.

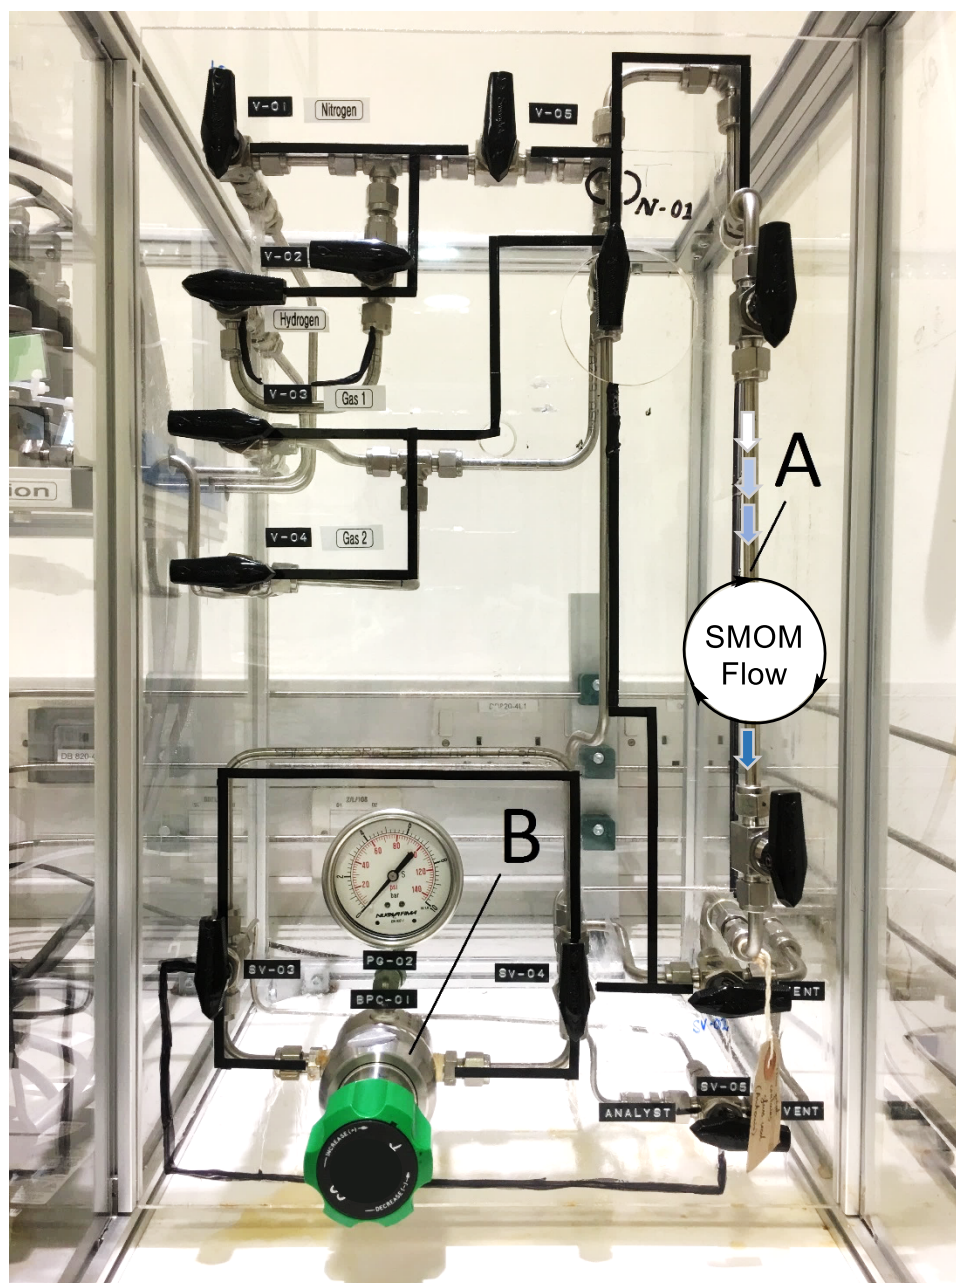

Figure S4: Bespoke continuous gas flow reactor setup fitted with the pre-loaded stainless-steel column (A) containing the catalyst or pre-catalyst, during a catalytic run. Note that the  $N_2$  and  $H_2$  feeds are closed whereas the gas 1 (1-butene) and gas 2 (isobutene) feeds are open and set to pass via the column (A). The outflow is set to pass via the loop, fitted with a regulator (B) to allow  $H_2$  pressurisation, and into the gas chromatograph, 'analyst'.

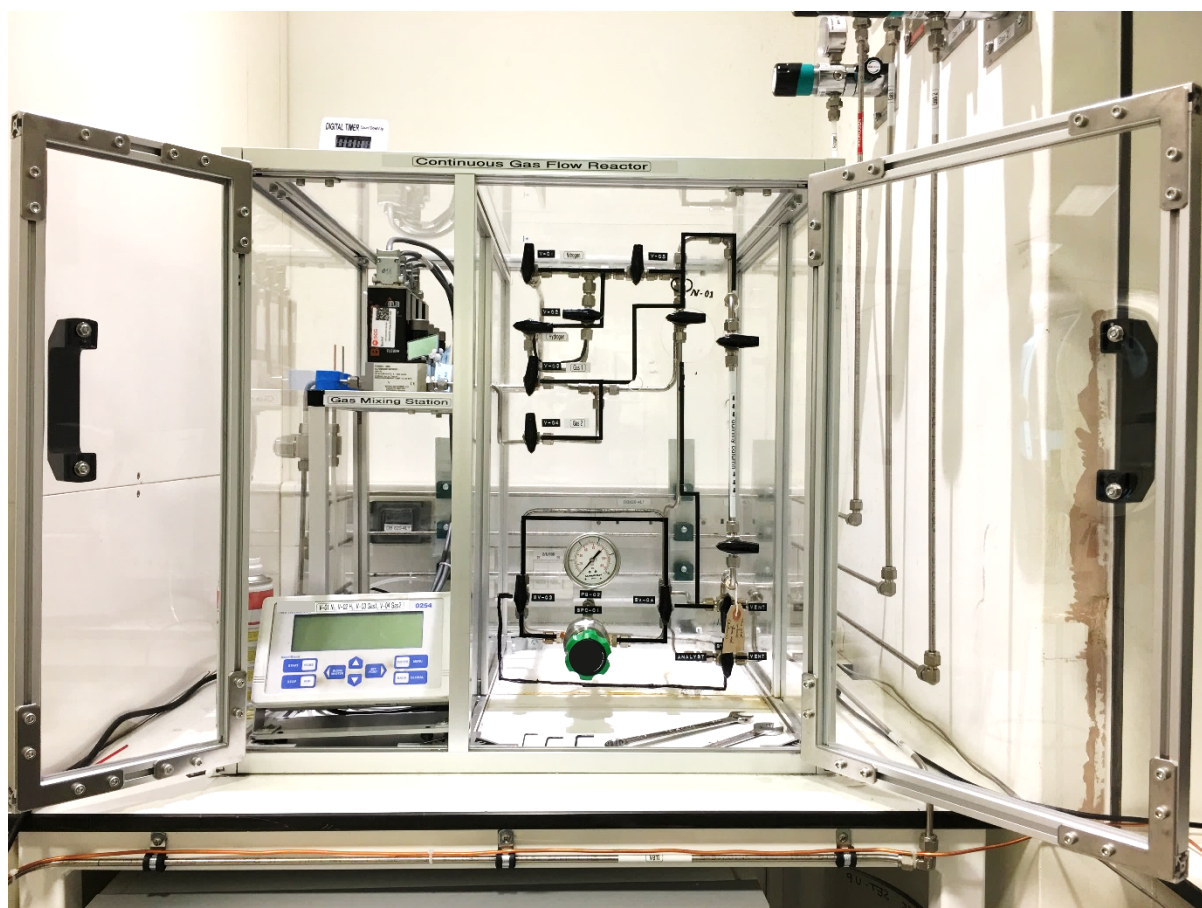

Figure S5: *Bespoke continuous gas flow reactor setup, dormant, fitted with a dummy column: full cabinet view. The mass-flow meters are visible in the leftmost compartment.*

### **S1.10.3 Typical Procedure for a Continuous Gas Flow Catalytic Experiment**

After fitting the packed column into the flow reactor under a  $50 \text{ mL min}^{-1}$  flow of  $\text{N}_2$ , tightening all relevant connections, and opening the two-way Swagelok valves at each end of the column, the column was then (1) purged with neat  $\text{N}_2$  gas, (2) the pre-catalyst pre-activated with neat  $\text{H}_2$  gas (if needed) and (3) the catalytic run was started.

**1) Neat  $\text{N}_2$  purging** – After the column containing the catalyst or pre-catalyst was fitted to the continuous gas flow reactor, the column was purged with neat  $\text{N}_2$  gas at  $50 \text{ mL min}^{-1}$  for 10 min. The  $\text{N}_2$  flow passing through the column was immediately vented, bypassing the regulated loop setup. Simultaneously, the substrate diluted gas mixture at their target flow rates were mixed and made to bypass the column, *via* the regulated loop and the gas chromatograph before venting (after the gas chromatograph). After this time, and before the catalytic run started, the  $\text{N}_2$  and substrate gas mixture flows were stopped.

**2) Pre-activation with  $\text{H}_2$  gas** (*only for pre-catalysts that require pre-activation with  $\text{H}_2$  gas before a catalytic run*) –  $\text{H}_2$  at  $100 \text{ mL min}^{-1}$  was passed through the system *via* the column and the regulated loop before venting for 5 min, before pressurisation of the system with  $\text{H}_2$  to 1 bar for 10 minutes, using the regulator setup. Then, the pressure was carefully released

and the H<sub>2</sub> flow stopped. A flow of N<sub>2</sub> at 50 mL min<sup>-1</sup> was resumed and passed *via* the column and the loop before venting for 10 minutes, in order to remove any remaining H<sub>2</sub> gas before the catalytic run was started.

**3) Addition of substrate diluted gas mixtures** – After the column was charged, fitted, purged with N<sub>2</sub> gas and activated with H<sub>2</sub> gas, the substrate diluted gas mixtures at the target flow rate(s) were passed through the column, *via* the regulated loop and the gas chromatograph before venting (after the gas chromatograph), for the relevant on-stream time(s). Gas aliquots were taken of the outflow and analysed by gas chromatography every 15 minutes *via* the automatic sampling loop installed in the chromatograph as described before.

## S2 X-ray Crystallography

### S2.1 Crystal Structure Determinations

Single-crystal X-ray diffraction data for the **7**, **9**, **10**, **11**, **12**, **13** and **14** were collected ( $\omega$ -scans) on Oxford Diffraction/Agilent SuperNova diffractometers with Cu- $K\alpha$  ( $\lambda = 1.54184 \text{ \AA}$ ) radiation equipped with nitrogen gas Oxford Cryosystems Cryostream unit<sup>11</sup> at the Oxford Chemical Crystallography Service from the University of Oxford. Diffraction images from raw frame data were reduced using CrysAlisPro.<sup>12</sup> The structures were solved using SHELXT<sup>13</sup> and refined to convergence on  $F^2$  and against all independent reflections by full-matrix least-squares using SHELXL<sup>14</sup> (version 2018/3) in combination with the GUI OLEX2<sup>15</sup> program. All non-hydrogen atoms were refined anisotropically and hydrogen atoms were geometrically placed unless otherwise stated (see specific details for each molecular structure in the text) and allowed to ride on their parent atoms. In several structures some of the  $\text{CF}_3$  groups on the  $\text{BAR}^{\text{F}_4^-}$  anion were disordered and modelled over two or three main domains, and restrained to maintain sensible geometries. Distances and angles were calculated using the full covariance matrix. Selected crystallographic data and refinement data are summarized in the text (see characterization data in Section 3 Synthetic Procedures) and full details are given in the supplementary deposited CIF files (CCDC 1945264-1945268 and 1945341). These data can be obtained free of charge from the Cambridge Crystallographic Data Centre via [http://www.ccdc.cam.ac.uk/data\\_request/cif](http://www.ccdc.cam.ac.uk/data_request/cif).

## S3 Synthetic Procedures

### S3.1 Synthesis and Characterisation of Single-Crystalline $[(dtbpe)Rh(NBD)][BAR^F_4]$ , Complex 7

#### S3.1.1 Synthesis of $[(dtbpe)RhCl]_2$

$[(COD)RhCl]_2$  (100 mg, 203  $\mu$ mol) and dtbpe (129 mg, 406  $\mu$ mol) were introduced to separate Schlenk flasks and separately dissolved in  $CH_2Cl_2$  (10 mL each). The dtbpe solution was then dropwise added to the  $[(COD)RhCl]_2$  solution *via* cannula. The reaction mixture was then allowed to stir at room temperature for 60 min before all volatiles were removed *in vacuo*. The resulting dark orange crude was washed with cold hexanes (3  $\times$  10 mL) and dried *in vacuo*. The resulting orange solid was dried *in vacuo* for 12 hours to give  $[(dtbpe)RhCl]_2$  (170 mg, 186  $\mu$ mol, 92%).  $[(dtbpe)RhCl]_2$  was used without further purification. Spectroscopic data of this product matched with reported values.<sup>16</sup>

#### S3.1.2 Synthesis of $[(dtbpe)Rh(NBD)][BAR^F_4]$ , Complex 7

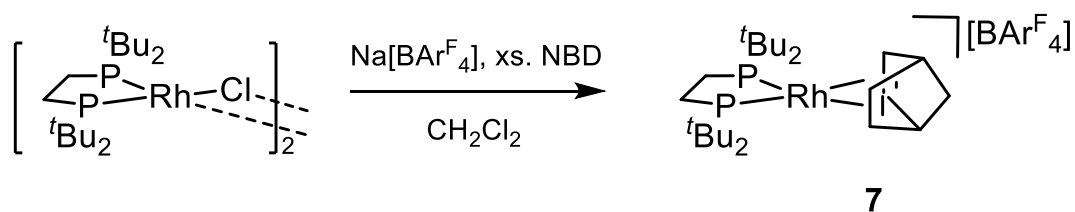

In separate Schlenk flasks,  $[(dtbpe)RhCl]_2$  (50 mg, 55  $\mu$ mol) and  $Na[BAR^F_4]$  (97 mg, 109  $\mu$ mol) were dissolved in  $CH_2Cl_2$  (10 mL each). NBD (0.1 mL, 983  $\mu$ mol, *c.* 9 eq.) was added to the  $Na[BAR^F_4]$  solution *via* syringe and stirred for one minute, before the  $[(dtbpe)RhCl]_2$  solution was dropwise added *via* cannula with stirring. The reaction mixture was stirred for 30 min at room temperature, and the contents were partially removed *in vacuo* (2.5 mL) to give a claret-coloured solution. The reaction mixture was then filtered *via* cannula, and the filtrate was layered with pentane at 298 K to give red crystalline plates of  $[(dtbpe)Rh(NBD)][BAR^F_4]$  **7** after 7 days (120 mg, 79%).

$^1H$  NMR (400.1 MHz,  $CD_2Cl_2$ , 298 K):  $\delta$  1.29 (d, 36 H,  $^3J_{HP} = 13.0$  Hz;  $tBu$ ), 1.75 (s, 2 H; NBD  $CH_2$ ), 1.82 (m, 4 H; *dtbpe*  $CH_2$ ), 4.19 (m, 2 H; NBD bridgehead CH), 5.54 (m, 4 H; NBD olefinic CH), 7.56 (s, 4 H; *p*-H), 7.72 (s, 8 H; *o*-H).

$^{13}C\{^1H\}$  NMR (100.6 MHz,  $CD_2Cl_2$ , 298 K):  $\delta$  23.1 (m; *dtbpe*  $CH_2$ ), 30.7 (vdd,  $J \sim 2.5$  Hz;  $tBu$   $CH_3$ ), 38.5 (ddd,  $^1J_{CP} = 8.4$  Hz,  $^2J_{CRh} = 6.3$  Hz,  $^3J_{CP} = 1.2$  Hz;  $tBu$   $C_Q$ ), 55.0 (m; bridgehead CH), 71.2 (NBD  $CH_2$ ), 81.1 (m; NBD olefinic CH), 118.1 (septet,  $^3J_{CF} = 3.8$  Hz; *p*- $C_{aryl}$ ), 125.1 (q,  $^1J_{CF} = 272.4$  Hz;  $CF_3$ ), 129.6 (qq,  $^2J_{CF} = 30.6$  Hz,  $^4J_{CF} = 2.6$  Hz;  $C_{aryl}-CF_3$ ), 135.3 (s; *o*- $C_{aryl}$ ), 162.3 (q,  $^1J_{CB} = 49.4$  Hz; *i*- $C_{aryl}$ ).

$^{13}\text{C}\{^1\text{H}\}$  SSNMR (100.6 MHz, 10 kHz spin rate, 298 K):  $\delta$  20.8 (*dtbpe* CH<sub>2</sub>), 28–39 (<sup>*t*</sup>Bu CH<sub>3</sub> + C<sub>Q</sub>), 54.0 (NBD CH<sub>2</sub>), 67.9 (NBD bridgehead CH), 72.2 (NBD olefinic CH), 85.5 (NBD olefinic CH), 116–137 (BAR<sup>F</sup><sub>4</sub>), 162.9 (BAR<sup>F</sup><sub>4</sub> C-B).

$^{13}\text{C}\{^1\text{H}\}$  SSNMR (100.6 MHz, 10 kHz spin rate, 158 K):  $\delta$  19.9 (*dtbpe* CH<sub>2</sub>), 23–39 (<sup>*t*</sup>Bu CH<sub>3</sub> + C<sub>Q</sub>), 53.9 (NBD CH<sub>2</sub>), 67.2 (NBD bridgehead CH), 70.6 (NBD olefinic CH), 86.3 (NBD olefinic CH), 116–137 (BAR<sup>F</sup><sub>4</sub>), 162.4 (BAR<sup>F</sup><sub>4</sub> C-B).

$^{31}\text{P}\{^1\text{H}\}$  NMR (161.9 MHz, CD<sub>2</sub>Cl<sub>2</sub>, 298 K):  $\delta$  84.0 ( $^1J_{\text{PRh}} = 154$  Hz).

$^{31}\text{P}\{^1\text{H}\}$  SSNMR (161.9 MHz, 10 kHz spin rate, 298 K):  $\delta$  77.7 (d+d,  $^1J_{\text{PRh}} \sim 140$  Hz).

$^{31}\text{P}\{^1\text{H}\}$  SSNMR (161.9 MHz, 10 kHz spin rate, 183 K):  $\delta$  75.1 (br. d+d,  $\nu_{1/2} \sim 300$  Hz).

$^{31}\text{P}\{^1\text{H}\}$  SSNMR (161.9 MHz, 10 kHz spin rate, 158 K):  $\delta$  75.0 (br. d+d,  $\nu_{1/2} \sim 325$  Hz).

$^{19}\text{F}\{^1\text{H}\}$  NMR (376.5 MHz, CD<sub>2</sub>Cl<sub>2</sub>, 298 K):  $\delta$  -62.8 (Ar<sup>F</sup>-CF<sub>3</sub>).

$^{11}\text{B}\{^1\text{H}\}$  NMR (128.4 MHz, CD<sub>2</sub>Cl<sub>2</sub>, 298 K):  $\delta$  -6.60 (BAR<sup>F</sup><sub>4</sub><sup>-</sup>).

ESI-MS (CH<sub>2</sub>Cl<sub>2</sub>) *m/z* found (calculated) for C<sub>25</sub>H<sub>49</sub>P<sub>2</sub>Rh [M]<sup>+</sup>: 514.2394 (514.2414).

Elemental analysis found (calculated) for C<sub>57</sub>H<sub>60</sub>BF<sub>24</sub>P<sub>2</sub>Rh: C, 49.77% (49.73%); H, 4.44% (4.39%).

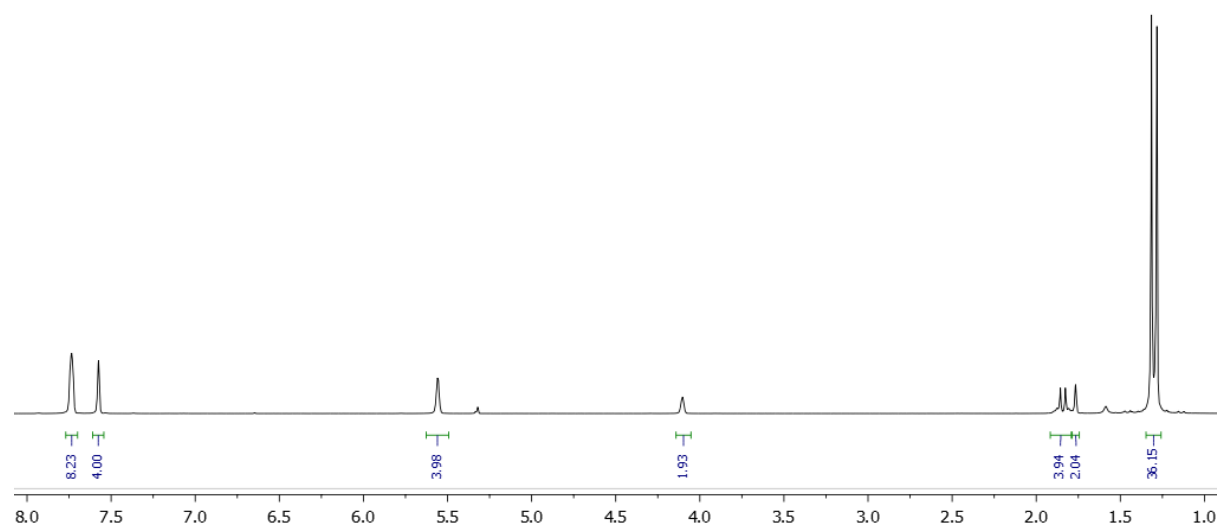

Figure S6:  $^1\text{H}$  NMR spectrum of complex **7** (400.1 MHz, CD<sub>2</sub>Cl<sub>2</sub>, 298 K).

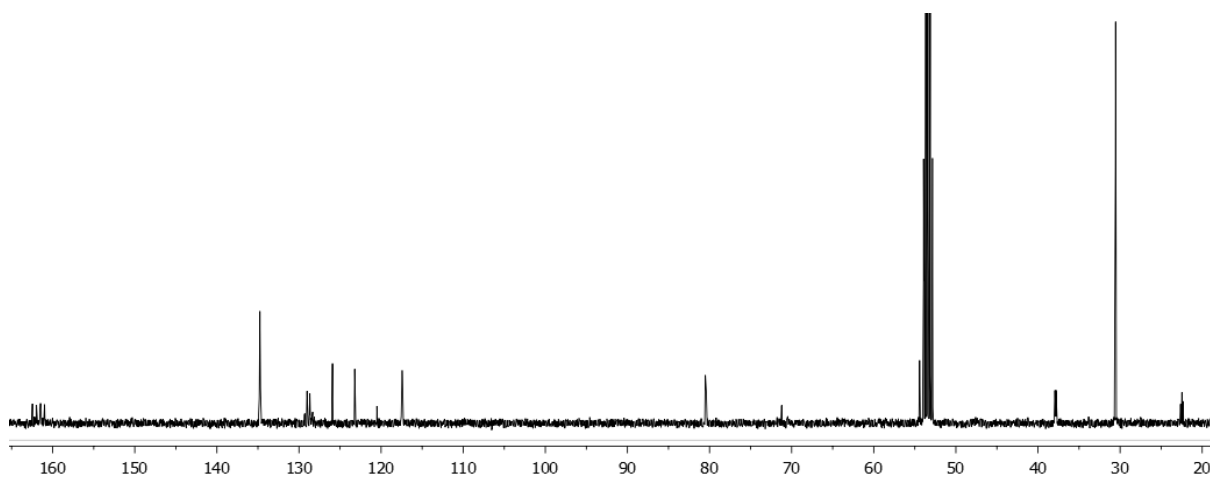

Figure S7:  $^{13}\text{C}\{^1\text{H}\}$  NMR spectrum of complex **7** (100.6 MHz, 298 K,  $\text{CD}_2\text{Cl}_2$ ).

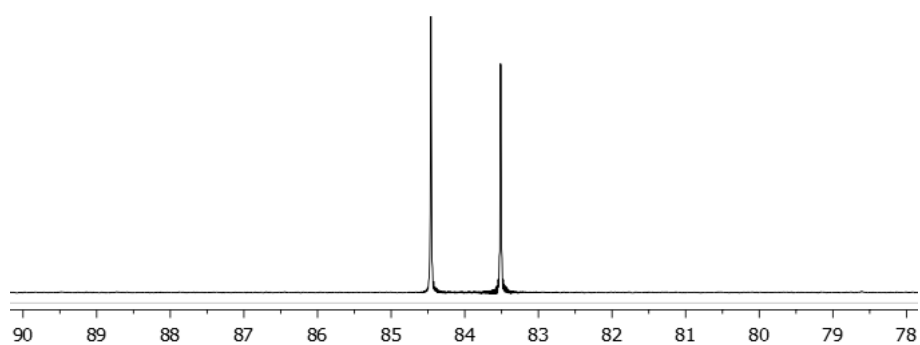

Figure S8:  $^{31}\text{P}\{^1\text{H}\}$  NMR spectrum of complex **7** (162 MHz, 298 K,  $\text{CD}_2\text{Cl}_2$ ).

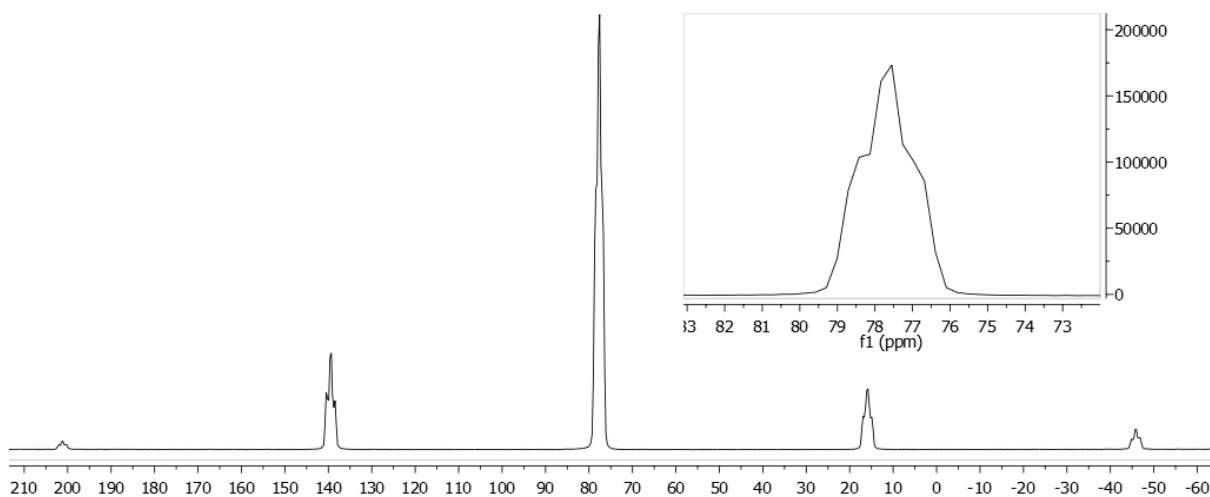

Figure S9:  $^{31}\text{P}\{^1\text{H}\}$  SSNMR spectrum of complex **7** (161.9 MHz, spinning speed 10 kHz, 298 K).



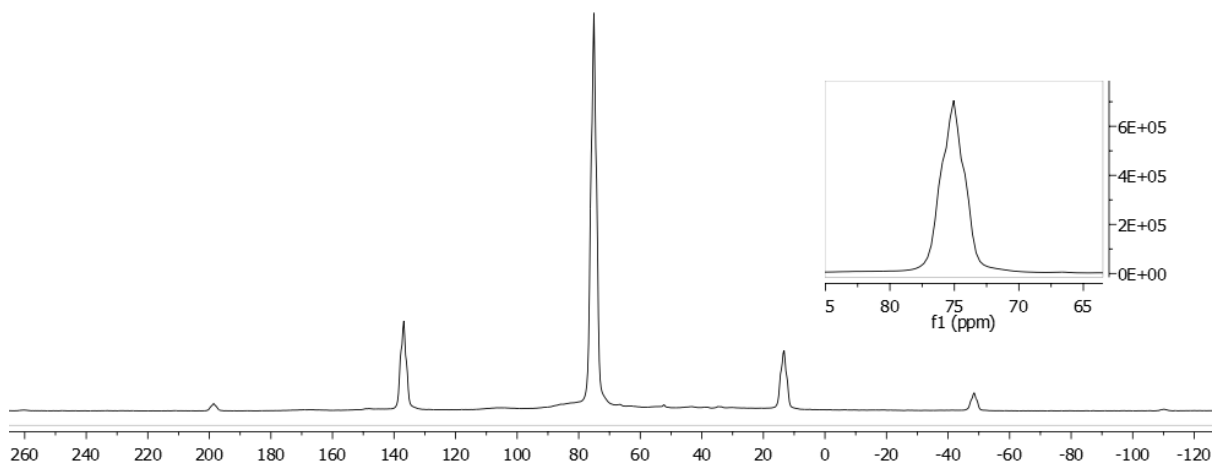

Figure S10:  $^{31}\text{P}\{^1\text{H}\}$  SSNMR spectrum of complex **7** (161.9 MHz, spinning speed 10 kHz, 183 K).

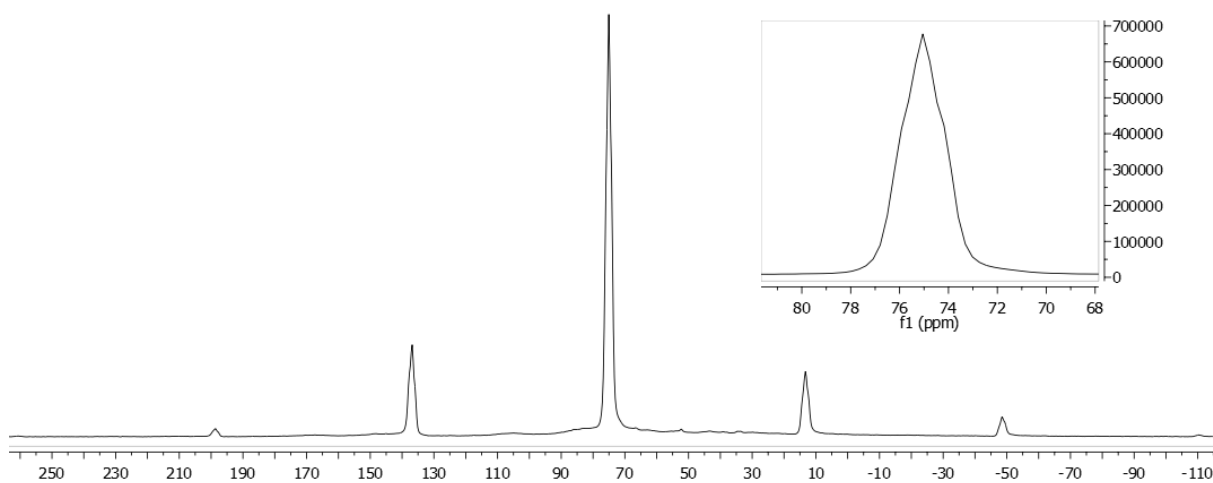

Figure S11:  $^{31}\text{P}\{^1\text{H}\}$  SSNMR spectrum of complex **7** (161.9 MHz, spinning speed 10 kHz, 158 K).

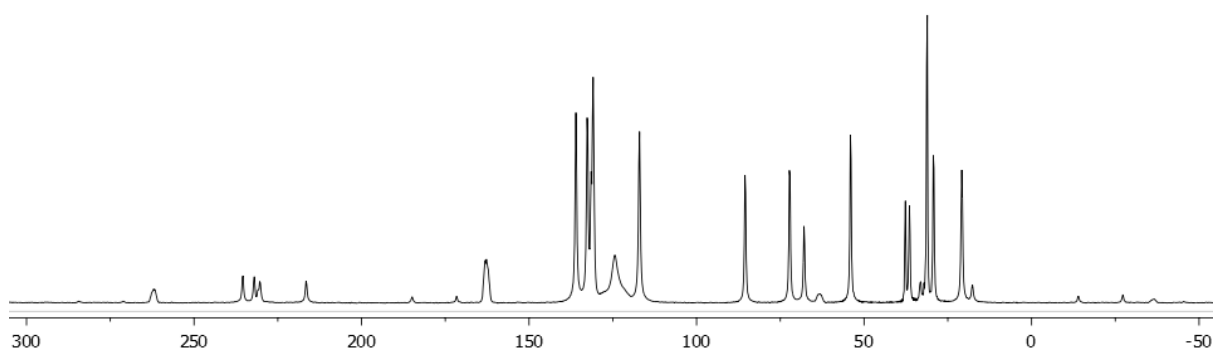

Figure S12:  $^{13}\text{C}\{^1\text{H}\}$  SSNMR spectrum of complex **7** (100.6 MHz, spinning speed 10 kHz, 298 K).

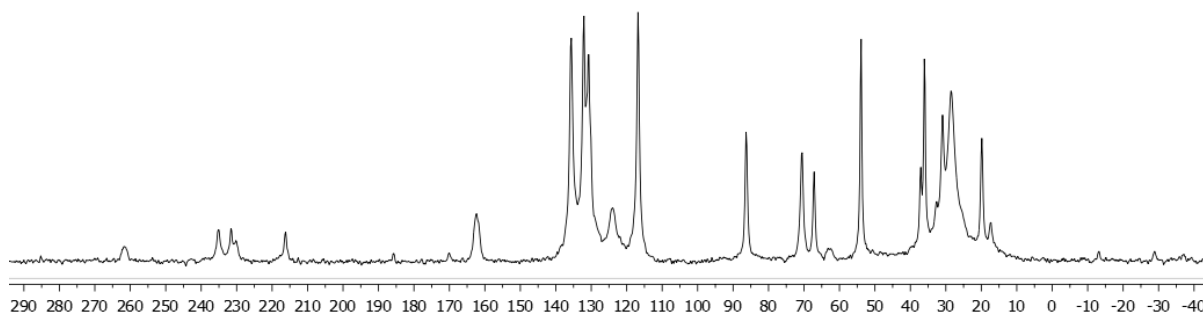

Figure S13:  $^{13}\text{C}\{^1\text{H}\}$  SSNMR spectrum of complex **7** (100.6 MHz, spinning speed 10 kHz, 158 K).

### S3.1.3 Selected Crystallographic and Refinement Data for Complex **7**

**Crystal data for **7** (CCDC 1945264):**  $\text{C}_{57}\text{H}_{60}\text{BF}_{24}\text{P}_2\text{Rh}$ ,  $M = 1376.71$  g/mol, monoclinic,  $C2$ ,  $a = 18.1357(3)$ ,  $b = 18.1424(4)$ ,  $c = 17.9779(4)$  Å,  $\beta = 90.1029(15)^\circ$ ,  $V = 5915.2(2)$  Å<sup>3</sup>,  $Z = 4$ ,  $\lambda(\text{Cu-K}\alpha) = 1.54184$  Å,  $T = 150(1)$  K, orange plate,  $\rho(\text{calcd, g cm}^{-3}) = 1.546$ ,  $\mu(\text{mm}^{-1}) = 3.869$ , 43751 reflections collected, 12248 independent measured reflections ( $R_{\text{int}} = 0.0330$ ),  $F^2$  refinement,  $R_1(\text{obs, } I > 2\sigma(I)) = 0.0269$ ,  $wR_2(\text{all data}) = 0.0711$ , 12088 independent observed reflections [ $|F_o| > 4\sigma(|F_o|)$ ],  $2\theta_{\text{max}} = 152.4^\circ$ ], 1093 restraints, 994 parameters, GOF = 1.049 and residual electron density ( $\text{e \AA}^{-3}$ ) = 0.539/-0.228.

### S3.1.4 Supplementary Analysis of the Solid-State Molecular Structure of Complex **7** by Single-Crystal X-ray Diffraction

The cationic fragment  $[(\text{dtbpe})\text{Rh}(\text{NBD})]^+$  (Figure S14) is surrounded by six  $\text{BARf}_4^-$  counteranions arranged into a near-perfect octahedron (Figure S15). P-symmetric (orthorhombic) and P-asymmetric (monoclinic) solutions were considered for this system. Given the virtual triplet visible in the  $^{31}\text{P}\{^1\text{H}\}$  solid-state NMR spectra at 298 K, 183 K and 158 K, indicating crystallographically distinct P environments, the monoclinic solution was chosen.

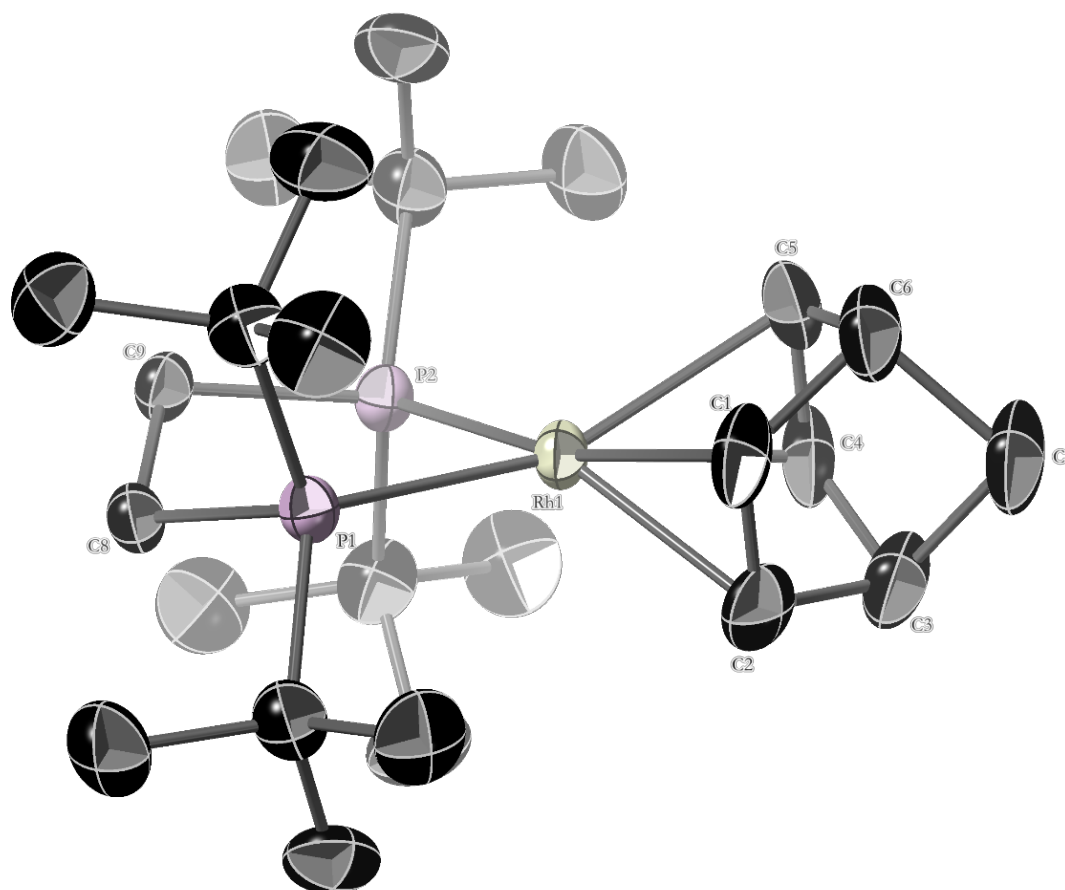

Figure S14: Cationic fragment  $[(dtbpe)Rh(NBD)]^+$  of **7**. 50% displacement ellipsoids. H atoms omitted for clarity. Selected bond lengths (Å) and angles ( $^\circ$ ), where Cent is the centroid of C1–C2 and Cent' is the centroid of C4–C5: Rh1–P1, 2.3517(8); Rh1–P2, 2.3488(8); Rh1–C1, 2.195(4); Rh1–Cent, 2.082(3); Rh1–C2, 2.192(4); Rh1–C4, 2.199(4); Rh1–Cent', 2.085(3); Rh1–C5, 2.192(4); P1–Rh1–P2, 86.34(3); P1–Rh1–Cent, 102.69(10); P2–Rh1–Cent', 102.72(9); C2–Rh1–C4, 65.60(19); Cent–Rh1–Cent', 69.63(13); C1–Rh1–C5, 65.73(19).

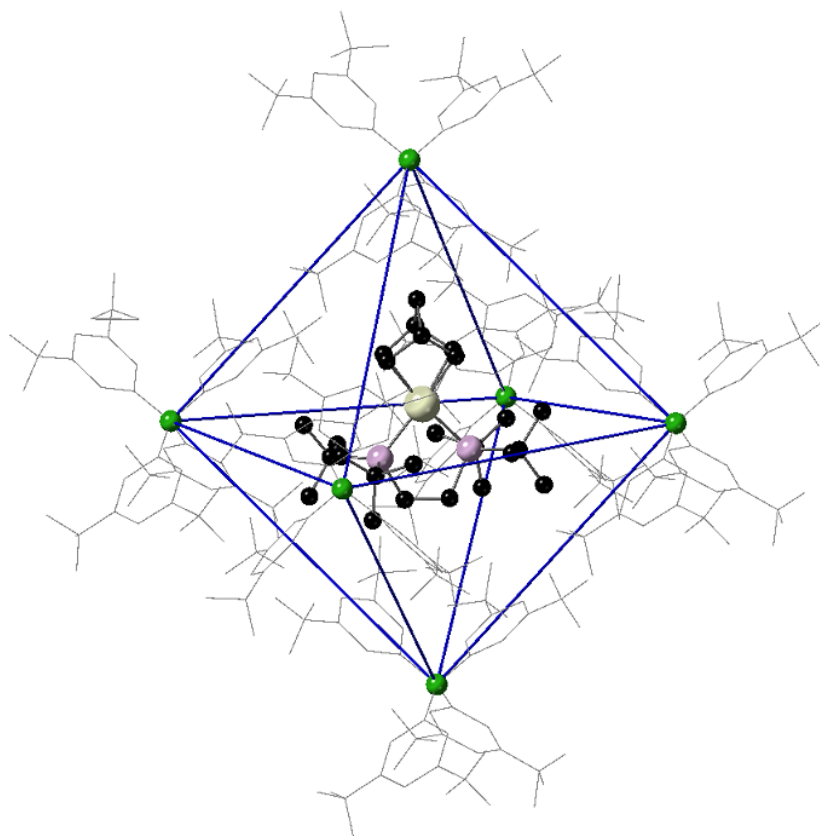

Figure S15: The regular octahedral packing environment of complex **7**; shown is the coordination of six nearest  $\text{BArF}_4^-$  neighbours (modelled as wireframe structures about a B atom ball) about the  $[(\text{dtbpe})\text{Rh}(\text{NBD})]^+$  cation (modelled as ball-and-stick).

### S3.2 *In Situ* Gas/Solid Synthesis and Characterisation of $[(\text{dtbpe})\text{Rh}(\text{NBA})][\text{BArF}_4]$ , Complex **8**

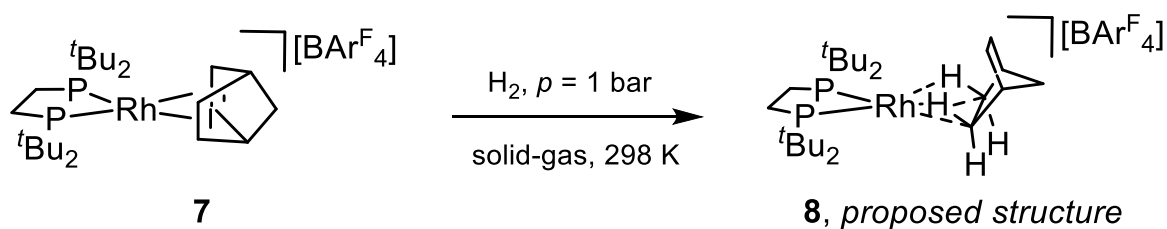

A 4.0 mm zirconia solid-state rotor was packed with c. 25 mg of **7** (c. 20  $\mu\text{mol}$ ). Left unsealed, the rotor was exposed<sup>2</sup> to  $\text{H}_2$  (1 bar) for 50 min and then the rotor was capped under a flow of  $\text{H}_2$  before solid-state NMR studies were undertaken.

*Note:* Due to the poor area of contact between the packed material and the atmosphere, hydrogenation *in situ* took longer than under *ex situ* conditions (see below).

This material can also be prepared by an *ex situ* solid-gas methodology, from finely powdered complex **7**, by reaction with  $\text{H}_2$  gas (1 bar) for 20 min at 298 K in a J. Young's flask. This claret-

coloured material is sensitive to moist air and does not survive in solution, even at 183 K, giving C-Cl activation products in CH<sub>2</sub>Cl<sub>2</sub> (converging on complex **13**) or the arene adduct (complex **9**) in 1,2-difluorobenzene. The extent of this reaction has been monitored *via* CD<sub>3</sub>CN quenching experiments (see Section 3.1). For crushed complex **7**, only *c.* 10 min was necessary for near-quantitative conversion to complex **8** (as determined by <sup>31</sup>P{<sup>1</sup>H} NMR spectroscopy).

<sup>31</sup>P{<sup>1</sup>H} SSNMR (161.9 MHz, 10 kHz spin rate, 298 K): δ 125.8 (vt, <sup>1</sup>J<sub>PRH</sub> ~ 190 Hz).

<sup>31</sup>P{<sup>1</sup>H} SSNMR (161.9 MHz, 10 kHz spin rate, 158 K): δ 119.3 (br. s, *v*<sub>1/2</sub> ~ 400 Hz).

<sup>13</sup>C{<sup>1</sup>H} SSNMR (100.6 MHz, 10 kHz spin rate, 298 K): δ 22.4 (dtbpe CH<sub>2</sub>), 29.3 (<sup>t</sup>Bu CH<sub>3</sub>), 36.4 (<sup>t</sup>Bu C<sub>Q</sub>), 117–136 (BAr<sup>F</sup><sub>4</sub>), 162.6 (BAr<sup>F</sup><sub>4</sub> C-B).

<sup>13</sup>C{<sup>1</sup>H} SSNMR (100.6 MHz, 10 kHz spin rate, 158 K): δ 22.0 (dtbpe CH<sub>2</sub>), 29.1 (<sup>t</sup>Bu CH<sub>3</sub>), 36.1 (<sup>t</sup>Bu C<sub>Q</sub>), 114–140 (BAr<sup>F</sup><sub>4</sub>), 161.5 (BAr<sup>F</sup><sub>4</sub> C-B).

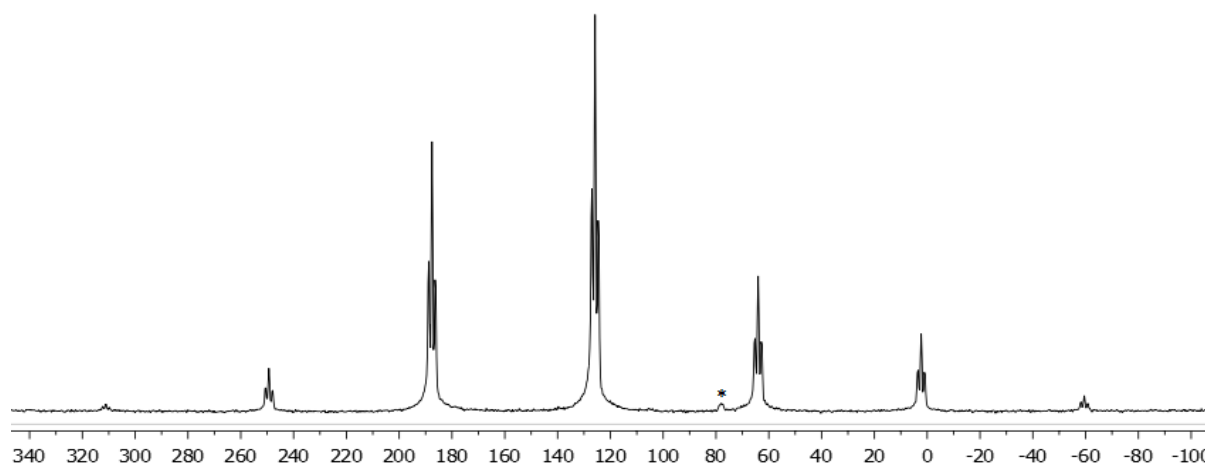

Figure S16: <sup>31</sup>P{<sup>1</sup>H} SSNMR spectrum of complex **8** (161.9 MHz, spinning speed 10 kHz, 298 K). \* indicates traces of unreacted complex **7**.

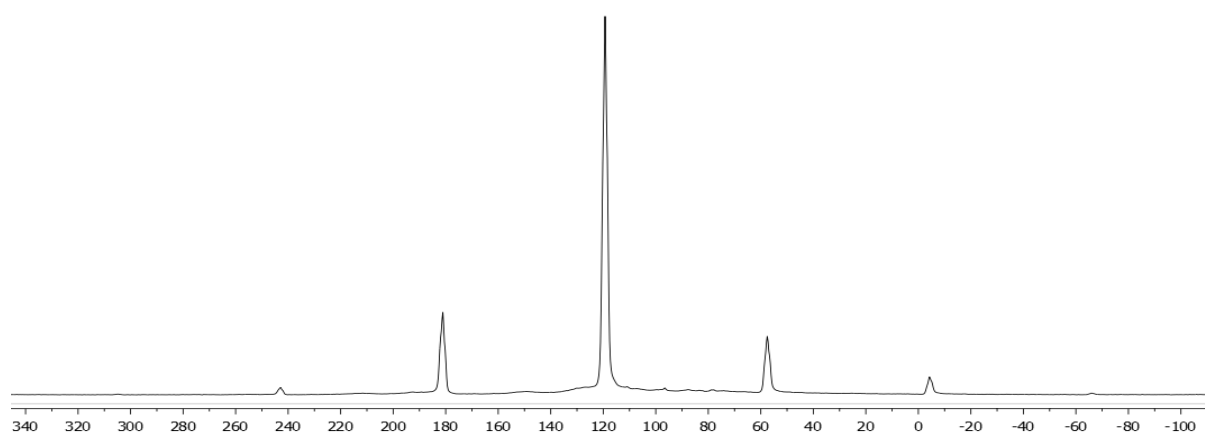

Figure S17: <sup>31</sup>P{<sup>1</sup>H} SSNMR spectrum of complex **8** (161.9 MHz, spinning speed 10 kHz, 158 K).

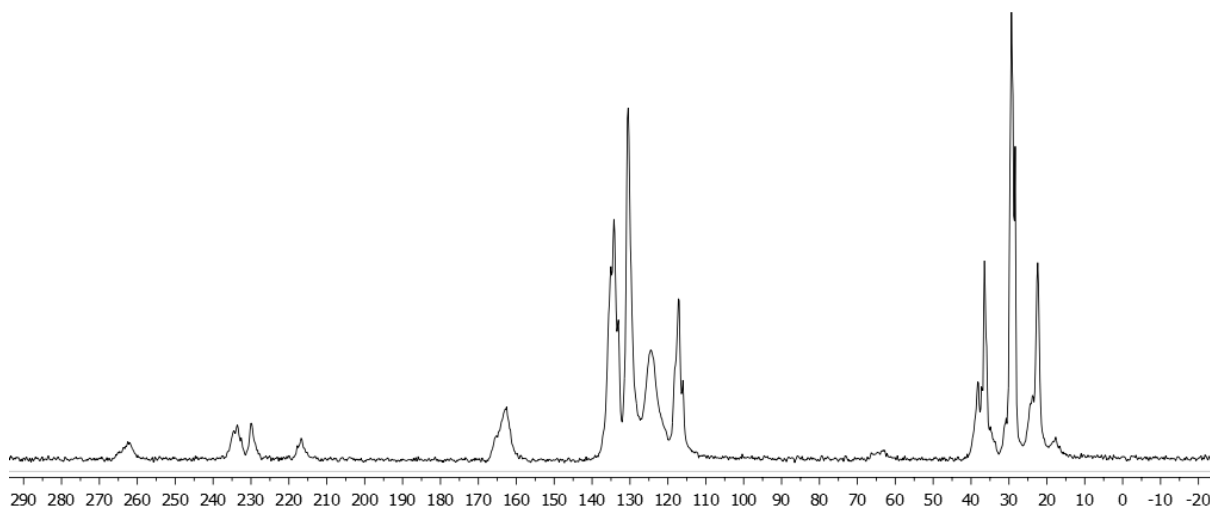

Figure S18:  $^{13}\text{C}\{^1\text{H}\}$  SSNMR spectrum of complex **8** (100.6 MHz, spinning speed 10 kHz, 298 K).

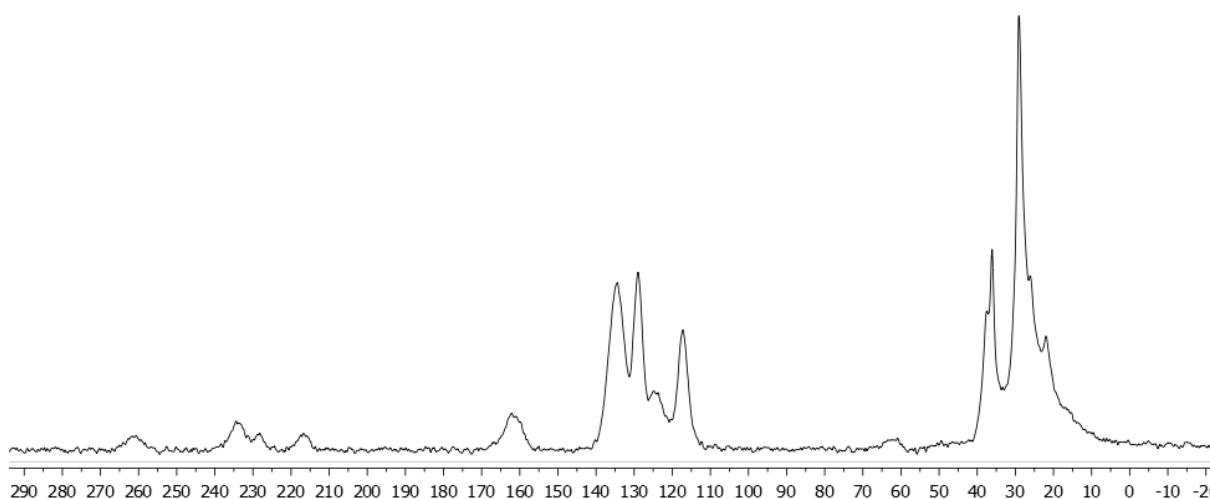

Figure S19:  $^{13}\text{C}\{^1\text{H}\}$  SSNMR spectrum of complex **8** (100.6 MHz, spinning speed 10 kHz, 158 K).

### S3.2.1 Attempted Single Crystal X-ray Diffraction Characterisation of complex **8**

Crystalline samples of **7** (c. 2 mg) were loaded into high-pressure NMR tubes fitted with Young's taps (controlled atmosphere valves). These tubes were evacuated and pressurised with  $\text{H}_2$  (1 bar) for a time  $t$ . After this time  $t$  had elapsed, the tubes were open and their contents immediately interrogated *via* single crystal X-ray diffraction in inert perfluoropolyether oil (Fomblin). In addition to a colour change from red to red-brown, crystals were observed to fracture and burst upon hydrogenation. Crystals for single-crystal x-ray diffraction studies were harvested from intact parts of otherwise split crystals, but diffraction was poor across all  $t$  considered ( $t = 2, 5, 10, 30$  and  $60$  min) and no diffraction data could be acquired for the postulated  $\sigma$ -alkane complex **8**. Section 3.3 includes the results of this experiment.

### S3.3 Synthesis and Characterisation of Single-Crystalline $[(dtbpe)Rh(\eta^6-1,2-C_6H_4F_2)][BAR^F_4]$ , Complex **9**

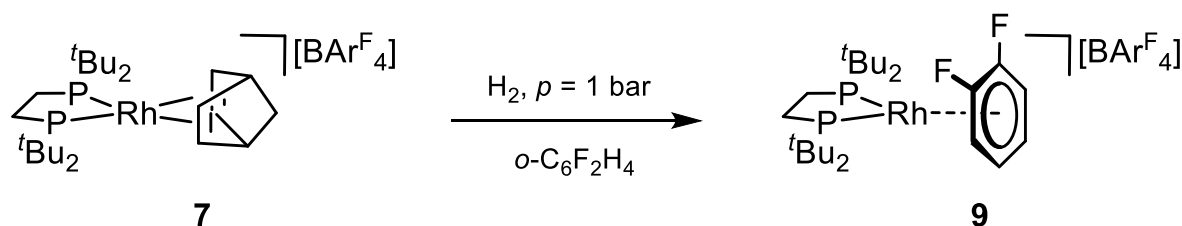

#### Method I

Powdered crystalline complex **7** (25 mg, 18  $\mu\text{mol}$ ) was introduced to a Young's flask and dissolved in 1,2-difluorobenzene (2 mL). The solution was frozen with liquid  $\text{N}_2$  before the flask was evacuated and pressurised with  $\text{H}_2$  (1 bar). After thawing and 30 min of stirring at room temperature (the solution should lighten significantly to a bright orange), the 1,2-difluorobenzene solution was layered with pentane to give crystals of the 1,2-difluorobenzene complex **9** as orange crystals (17 mg, 12  $\mu\text{mol}$ , 68%) after 24 h.

#### Method II

Powdered crystalline complex **7** (25 mg, 18  $\mu\text{mol}$ ) was introduced to a Young's flask. The flask was evacuated and pressurised with  $\text{H}_2$  for 45 min before removal of the  $\text{H}_2$  atmosphere and then pressurisation with argon (1 bar). The resulting claret-coloured solid, **8**, was dissolved in 1,2-difluorobenzene (2 mL) and stirred for 30 min at room temperature before removal of all volatiles *in vacuo* to give complex **9** quantitatively as an orange powder.

Repetition of this protocol with a hydrogenation time of just 10 min still provided near-quantitative conversion (*c.* 97% *versus* unreacted complex **7**), verified by  $^{31}\text{P}\{^1\text{H}\}$  NMR studies in 1,2-difluorobenzene, but optimal time for quantitative conversion was confirmed to be 40–50 min under  $\text{H}_2$  (1 bar).

$^1\text{H}$  NMR (400.1 MHz,  $\text{CD}_2\text{Cl}_2$ , 298 K):  $\delta$  1.25 (d, 36 H,  $^3J_{\text{HP}} = 13.6$  Hz;  $^t\text{Bu}$ ), 1.78 (d,  $^2J_{\text{PP}} = 13.4$  Hz, 4 H; *dtbpe*  $\text{CH}_2$ ), 6.41 (br. m, 2 H; difluorobenzene), 6.86 (m,  $J = 5.0$  Hz,  $J' = 3.1$  Hz, 2 H; difluorobenzene), 7.58 (s, 4 H; *p*-H  $\text{BAR}^{\text{F}}_4^-$ ), 7.74 (s, 8 H; *o*-H  $\text{BAR}^{\text{F}}_4^-$ ).

$^{13}\text{C}\{^1\text{H}\}$  NMR (100.6 MHz,  $\text{CD}_2\text{Cl}_2$ , 298 K):  $\delta$  24.1 (m; *dtbpe*  $\text{CH}_2$ ), 30.3 (s;  $^t\text{Bu}$   $\text{CH}_3$ ), 38.7 (dm,  $^1J_{\text{CP}} = 19.1$  Hz;  $^t\text{Bu}$   $\text{C}_\text{O}$ ), 91.5 (m; difluorobenzene), 95.4 (br. m; difluorobenzene), 118.1 (septet,  $^3J_{\text{CF}} = 3.7$  Hz; *p*- $\text{C}_{\text{aryl}}$   $\text{BAR}^{\text{F}}_4^-$ ), 123.1 (d,  $^1J_{\text{CF}} = 420.3$  Hz; difluorobenzene C-F), 125.2 (q,  $^1J_{\text{CF}} = 272.6$  Hz;  $\text{CF}_3$   $\text{BAR}^{\text{F}}_4^-$ ), 129.5 (qq,  $^2J_{\text{CF}} = 31.7$  Hz,  $^4J_{\text{CF}} = 3.0$  Hz;  $\text{C}_{\text{aryl}}\text{-CF}_3$   $\text{BAR}^{\text{F}}_4^-$ ), 135.4 (s; *o*- $\text{C}_{\text{aryl}}$ ), 162.4 (q,  $^1J_{\text{CB}} = 50.0$  Hz; *i*- $\text{C}_{\text{aryl}}$   $\text{BAR}^{\text{F}}_4^-$ ).

$^{31}\text{P}\{^1\text{H}\}$  NMR (161.9 MHz,  $\text{CD}_2\text{Cl}_2$ , 298 K):  $\delta$  117.7 ( $^1J_{\text{PRh}} = 206$  Hz).

$^{19}\text{F}\{^1\text{H}\}$  NMR (376.5 MHz,  $\text{CD}_2\text{Cl}_2$ , 298 K):  $\delta$  -141.2 (1,2-difluorobenzene), -62.8 ( $\text{Ar}^{\text{F}}\text{-CF}_3$ ).

$^{11}\text{B}\{^1\text{H}\}$  NMR (128.4 MHz,  $\text{CD}_2\text{Cl}_2$ , 298 K):  $\delta$  -6.60 ( $\text{BAr}^{\text{F}}_4^-$ ).

ESI-MS ( $\text{CH}_2\text{Cl}_2$ )  $m/z$  found (calculated) for  $\text{C}_{24}\text{H}_{44}\text{F}_2\text{P}_2\text{Rh}$   $[\text{M}]^+$ : 535.1974 (535.1936).

Elemental analysis found (calculated) for  $\text{C}_{56}\text{H}_{56}\text{BF}_{26}\text{P}_2\text{Rh}$ : C, 48.03% (48.09%); H, 4.13% (4.04%).

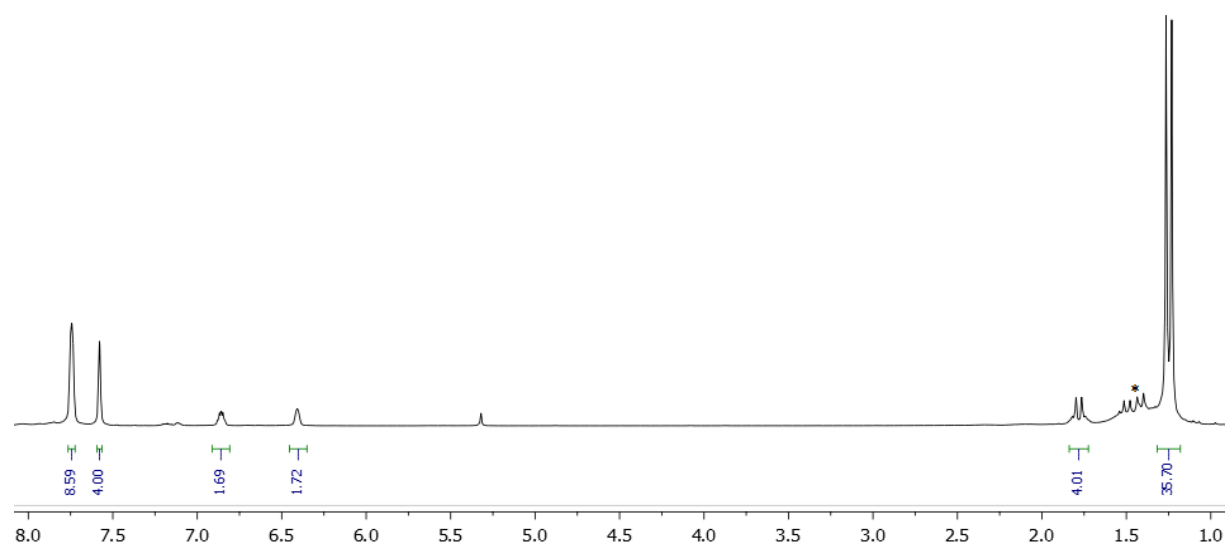

Figure S20:  $^1\text{H}$  NMR spectrum of complex **9** (400.1 MHz, 298 K,  $\text{CD}_2\text{Cl}_2$ ). \* indicates unknown degradation products.

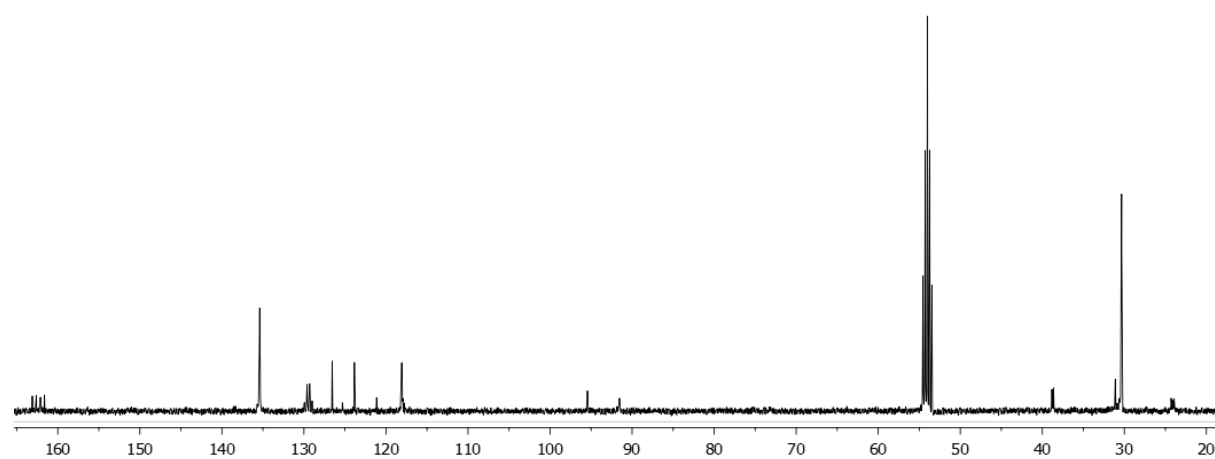

Figure S21:  $^{13}\text{C}\{^1\text{H}\}$  NMR spectrum of complex **9** (100.6 MHz, 298 K,  $\text{CD}_2\text{Cl}_2$ ).



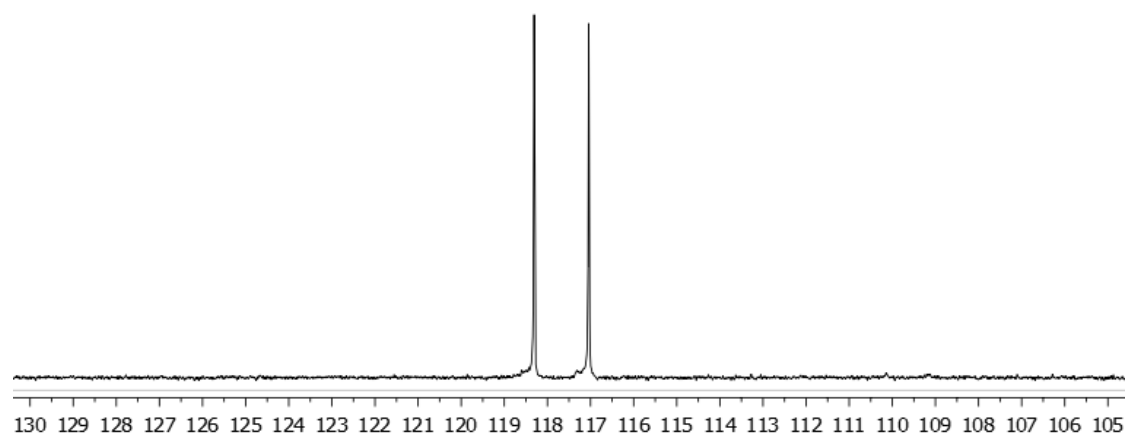

Figure S22:  $^{31}\text{P}\{^1\text{H}\}$  NMR spectrum of complex **9** (161.9 MHz, 298 K,  $\text{CD}_2\text{Cl}_2$ ).

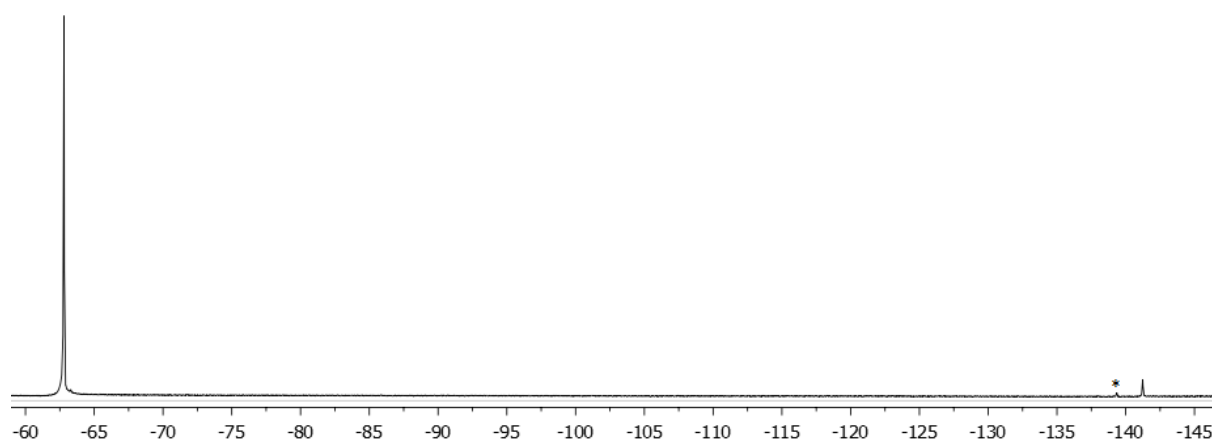

Figure S23:  $^{19}\text{F}\{^1\text{H}\}$  NMR spectrum of complex **9** (376.5 MHz, 298 K,  $\text{CD}_2\text{Cl}_2$ ). \* indicates free 1,2-difluorobenzene.

### S3.3.1 Selected Crystallographic and Refinement Data for Complex **9**

**Crystal data for 9 (CCDC 1945265):**  $\text{C}_{56}\text{H}_{56}\text{BF}_{26}\text{P}_2\text{Rh}$ ,  $M = 1398.66$  g/mol, orthorhombic,  $Pccn$ ,  $a = 35.5500(5)$ ,  $b = 17.7103(2)$ ,  $c = 18.7565(3)$  Å,  $\alpha = \beta = \gamma = 90^\circ$ ,  $V = 11809.1(3)$  Å<sup>3</sup>,  $Z = 8$ ,  $\lambda(\text{Cu-K}\alpha) = 1.54184$  Å,  $T = 150(1)$  K, yellow plate,  $\rho(\text{calcd, g cm}^{-3}) = 1.573$ ,  $\mu(\text{mm}^{-1}) = 3.937$ , 46114 reflections collected, 12210 independent measured reflections ( $R_{\text{int}} = 0.0586$ ),  $F^2$  refinement,  $R_1(\text{obs, } I > 2\sigma(I)) = 0.1069$ ,  $wR_2(\text{all data}) = 0.2856$ , 10373 independent observed reflections [ $|F_o| > 4\sigma(|F_o|)$ ],  $2\theta_{\text{max}} = 152.1^\circ$ , 1749 restraints, 1161 parameters, GOF = 1.032 and residual electron density ( $\text{e \AA}^{-3}$ ) = 1.449/-1.249.

### S3.3.2 Supplementary Analysis of the Solid-State Molecular Structure of Complex 9 by Single-Crystal X-ray Diffraction

The cationic fragment  $[(dtbpe)Rh(1,2\text{-difluorobenzene})]^+$  (Figure S24) is surrounded by six  $BArF_4^-$  counteranions arranged into a near-perfect octahedron (Figure S25). The cationic fragment is disordered over two symmetry-unrelated positions where the minor (c. 22% refined chemical occupancies) and major (c. 78%) components are differentiated by a c.  $83^\circ$  tilt of the P1–Rh1–P2 plane.

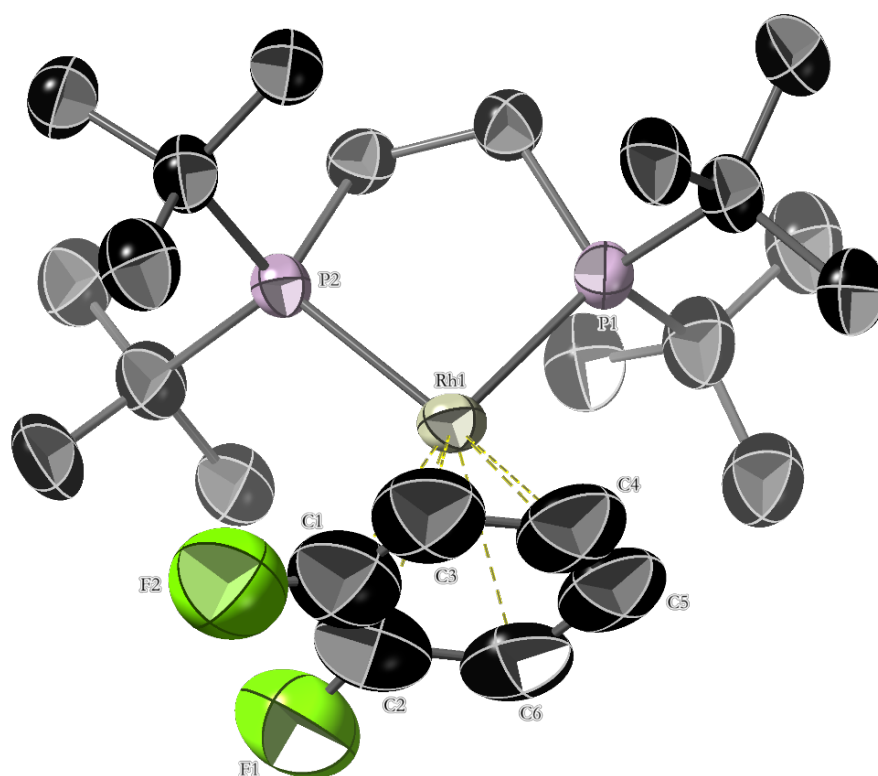

Figure S24: Cationic fragment  $[(dtbpe)Rh(1,2\text{-difluorobenzene})]^+$  of **9**, major (c. 78%) disordered component. 50% displacement ellipsoids. H atoms omitted for clarity. Selected bond lengths ( $\text{\AA}$ ) and angles ( $^\circ$ ), where Cent is the centroid of the arene: Rh1–P1, 2.285(3); Rh1–P2, 2.300(2); Rh1–Cent, 1.862(7); C1–C2, 1.21(3); C2–C6, 1.46(3); C6–C5, 1.37(3); C5–C4, 1.31(3); C4–C3, 1.46(3); C3–C1, 1.34(3); C1–F2, 1.23(2); C2–F1, 1.30(2); P1–Rh1–P2, 86.93(9); C1–C2–C6, 120(2); C2–C6–C5, 117.0(17); C6–C5–C4, 117.9(16); C5–C4–C3, 124.5(17); C4–C3–C1, 111.4(19); C3–C1–C2, 129(2).

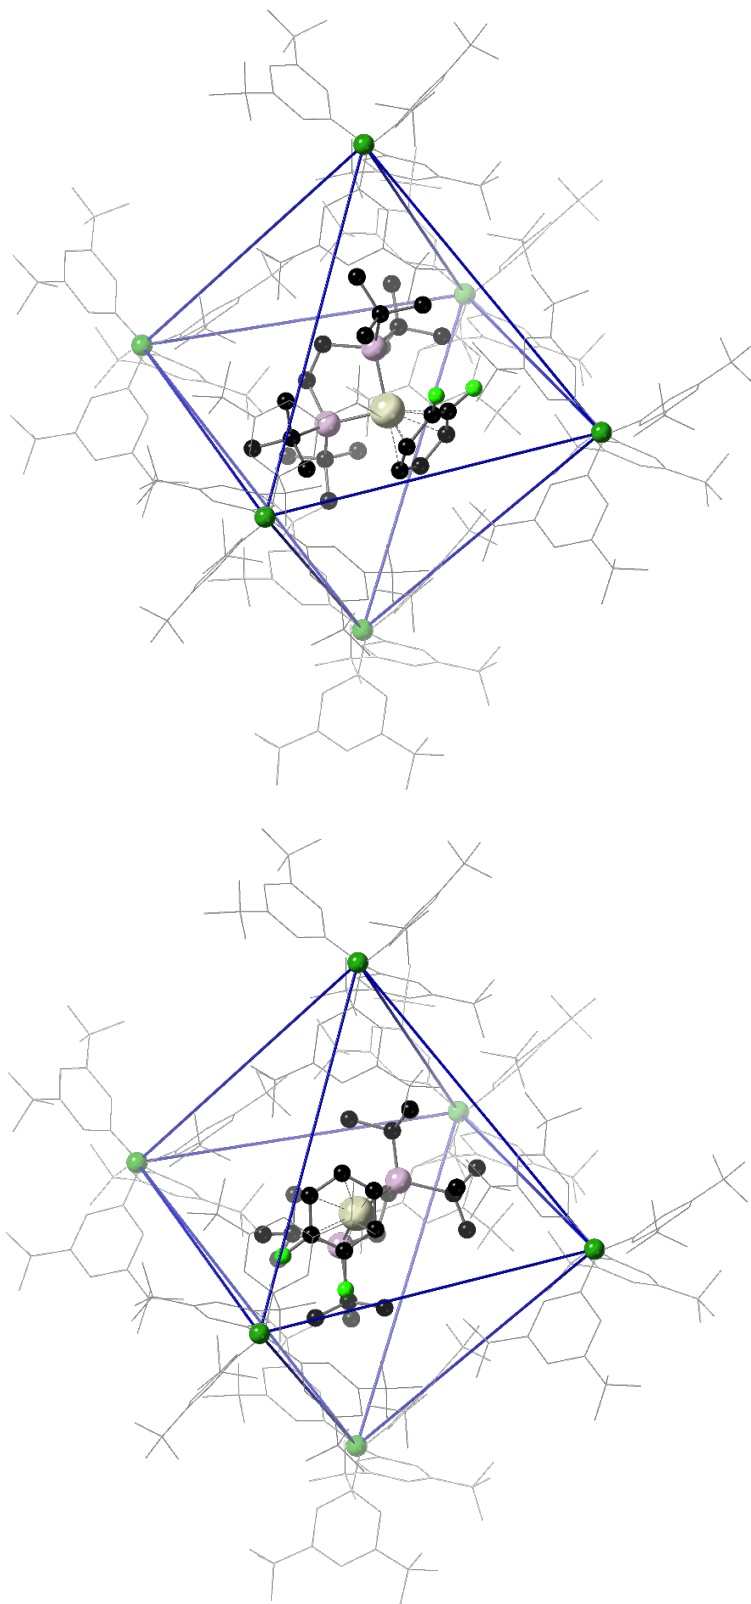

Figure S25: The packing environment of  $[(dtbpe)Rh(1,2\text{-difluorobenzene})][BAr^F_4]$  (**9**), of which both the major (c. 78%, top) and minor (c. 22%, bottom) disordered components are shown (modelled as ball-and-stick), and their six mutual nearest  $BAr^F_4^-$  neighbours (modelled as wireframes with B atom balls).

**S3.4 Synthesis and Characterisation of Single-Crystalline [(dtbpe)Rh(*butenes*)][BAR<sup>F</sup><sub>4</sub>] (*butenes* = 1-butene, *cis*-2-butene), Complex 10/11**

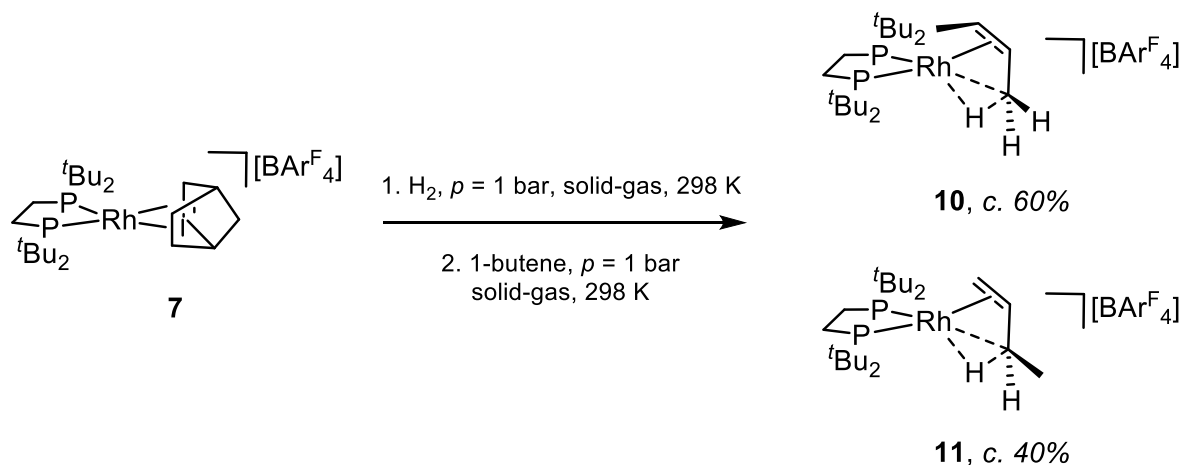

Crystalline complex **7** (c. 2 mg) was introduced to a high-pressure NMR tube fitted with a Young's tap (controlled atmosphere valve), before the tube was evacuated and pressurised with H<sub>2</sub> (1 bar) to form complex **8**. After 45 min, the NMR tube was again evacuated, and pressurised with 1-butene (1 bar) for 48 hours. The resulting air-sensitive orange crystals of [(dtbpe)Rh(*butenes*)][BAR<sup>F</sup><sub>4</sub>], complexes **10** ([[(dtbpe)Rh(*cis*-2-butene)][BAR<sup>F</sup><sub>4</sub>], c. 60%) and **11** ([[(dtbpe)Rh(1-butene)][BAR<sup>F</sup><sub>4</sub>], c. 40%, proportions in the solid state ascertained from single-crystal x-ray diffraction) are stable indefinitely under an argon atmosphere and for at least seven days under an atmosphere of *butenes*.

Samples for solid-state NMR analysis were prepared *in situ*. A 4.0 mm zirconia solid-state rotor was packed with c. 25 mg of **7** (c. 20 μmol). Left unsealed, the rotor was introduced<sup>2</sup> to H<sub>2</sub> (1 bar) for 50 min, followed by evacuation and re-pressurisation with 1-butene (1 bar) for 48 hours and closure of the rotor under a flow of 1-butene.

Rapid libration and allyl hydride/alkene tautomerism of the olefin complexes has been previously established,<sup>2</sup> and is likely responsible for these species' broadness in their NMR spectra in CD<sub>2</sub>Cl<sub>2</sub> at 183 K. Cross-peaks visible in the <sup>1</sup>H/<sup>1</sup>H COSY NMR spectrum (CD<sub>2</sub>Cl<sub>2</sub>, 183 K; *Figure S26*) at 183 K confirm the presence of 2-butene olefinic CH coincident with the *protio*-solvent and correlating with CH<sub>3</sub> at δ<sub>H</sub> = 0.41 ppm. Comparison with the independently synthesised butadiene complex **12** (*vide infra*) confirms that dehydrogenation to give the butadiene complex does *not* occur appreciably in the solid-state, in contrast to complex **1**.

The <sup>1</sup>H NMR spectrum (CD<sub>2</sub>Cl<sub>2</sub>, 183 K; *Figure S26*) suggests that the *cis*-2-butene fragment is undergoing a fluxional process, providing a single signal for agostic CH<sub>3</sub> and for olefinic CH. Where two <sup>1</sup>H <sup>t</sup>Bu environments are observed for the 1-butene complex, in the *cis*-2-butene complex only one environment is observed. In the <sup>1</sup>H NMR spectrum for the 1-butene complex, agostic CH, allylic non-agostic CH, CH<sub>3</sub>, and all three olefinic CH are resolvable. Only one olefinic carbon is resolvable in the <sup>13</sup>C{<sup>1</sup>H} NMR spectrum (CD<sub>2</sub>Cl<sub>2</sub>, 183 K; *Figure S28*).

Where the NBA complex **8** produces a virtual triplet in the  $^{31}\text{P}\{^1\text{H}\}$  SSNMR spectrum at 298 K (Figure S16), the butenes complex **10/11** produces a more complicated resonance from overlapping signals of two doublets of doublets (Figure S33). Furthermore, no significant signals are visible in the alkene region of the  $^{13}\text{C}\{^1\text{H}\}$  solid-state NMR (Figure S29) at 298 K, but signals do emerge in this region upon cooling to 183 K (Figure S30). Similar cooling produces a loss of definition in the  $^{31}\text{P}\{^1\text{H}\}$  solid-state NMR (Figure S34).

$^1\text{H}$  NMR (400.1 MHz,  $\text{CD}_2\text{Cl}_2$ , 183 K):  $\delta$  0.05 (br. s, 0.4 H; agostic  $\text{CH}^*$ ), 0.41 (br. s, 3.6 H; agostic  $\text{CH}_3^\dagger$ ), 1.06 (d,  $^3J_{\text{HP}} = 13.8$  Hz, c. 7 H;  $^t\text{Bu}^*$ ), 1.19 (vdd,  $^3J_{\text{HP}} = 13.2$  Hz, c. 22 H;  $^t\text{Bu}^\dagger$ ), 1.27 (d,  $^3J_{\text{HP}} = 13.6$  Hz, c. 7 H;  $^t\text{Bu}^*$ ), 1.45 (br. t,  $^3J_{\text{HH}} \sim 5.5$  Hz, 1.2 H;  $\text{CH}_3^*$ ), 1.65–2.02 (m,  $\Sigma = 4.0$  H; *dtbpe*  $\text{CH}_2^{*\dagger}$ ), 2.09 (br. s, 0.4 H; allylic non-agostic  $\text{CH}^*$ ), 3.37 (d,  $^3J_{\text{HH}} = 14.0$  Hz, 0.4 H; olefinic  $\text{CH}^*$ ), 4.74 (m, 0.4 H; olefinic  $\text{CH}^*$ ), 4.86 (d,  $J = 7.5$  Hz, 0.4 H; olefinic  $\text{CH}^*$ ), 7.53 (s, 4 H; *p*-H), 7.71 (s, 8 H, *o*-H). Olefinic  $\text{CH}^\dagger$  is obscured by the protio-solvent, confirmed by COSY experiments.

$^{13}\text{C}\{^1\text{H}\}$  NMR (100.6 MHz,  $\text{CD}_2\text{Cl}_2$ , 183 K):  $\delta$  11.2 (d,  $^2J_{\text{CRh}} = 4.8$  Hz; agostic  $\text{CH}_n^*$ ), 13.3 (br. s $^\dagger$ ), 18.0 (s; 1-butene  $\text{CH}_3$ ), 20.2 (br. m $^\dagger$ ), 25.5 (br. m $^\dagger$ ), 29.7 (m;  $^t\text{Bu}$   $\text{CH}_3$ ), 35.9 (d,  $^1J_{\text{CP}} \sim 19$  Hz;  $^t\text{Bu}$   $\text{C}_Q^\dagger$ ), 36.2 (d,  $^1J_{\text{CP}} \sim 18$  Hz;  $^t\text{Bu}$   $\text{C}_Q^*$ ), 36.4 (d,  $^1J_{\text{CP}} \sim 18$  Hz;  $^t\text{Bu}$   $\text{C}_Q^*$ ), 37.5 (d,  $^1J_{\text{CP}} \sim 18$  Hz;  $^t\text{Bu}$   $\text{C}_Q^*$ ), 37.9 (d,  $^1J_{\text{CP}} \sim 18$  Hz;  $^t\text{Bu}$   $\text{C}_Q^*$ ), 38.2 (d,  $^1J_{\text{CP}} \sim 19$  Hz;  $^t\text{Bu}$   $\text{C}_Q^\dagger$ ), 90.2 (olefinic  $\text{C}^*$ ), 90.3 (olefinic  $\text{C}^\dagger$ ), 90.4 (olefinic  $\text{C}^*$ ), 117.2 (br. sept,  $^3J_{\text{CF}} \sim 4$  Hz; *p*- $\text{C}_{\text{aryl}}$ ), 124.1 (q,  $^1J_{\text{CF}} = 272.6$  Hz;  $\text{CF}_3$ ), 128.3 (qm,  $^2J_{\text{CF}} \sim 30$  Hz;  $\text{C}_{\text{aryl}}\text{-CF}_3$ ), 134.3 (s; *o*- $\text{C}_{\text{aryl}}$ ), 161.5 (q,  $^1J_{\text{CB}} \approx 50$  Hz ( $^{11}\text{B}$ ); *i*- $\text{C}_{\text{aryl}}$ ).

\* corresponds to [(*dtbpe*)Rh(1-butene)][ $\text{BAR}^{\text{F}_4}$ ], complex **11** (minor, c. 40%);  $^\dagger$  corresponds to [(*dtbpe*)Rh(*cis*-2-butene)][ $\text{BAR}^{\text{F}_4}$ ], complex **10** (major, c. 60%). All  $^1\text{H}$  NMR resonances are scaled according to  $\text{BAR}^{\text{F}_4^-}$  aryl C-H integrals normalised to 8H:4H.

$^{13}\text{C}\{^1\text{H}\}$  SSNMR (100.6 MHz, 10 kHz spin rate, 298 K):  $\delta$  10–40 (*dtbpe*), 115–140 ( $\text{BAR}^{\text{F}_4}$ ), 163 ( $\text{BAR}^{\text{F}_4}$  C-B).

$^{13}\text{C}\{^1\text{H}\}$  SSNMR (100.6 MHz, 10 kHz spin rate, 183 K):  $\delta$  10–40 (*dtbpe*), 88.3 (olefinic C), 88.9 (olefinic C), 90.5 (olefinic C), 115–140 ( $\text{BAR}^{\text{F}_4}$ ), 163 ( $\text{BAR}^{\text{F}_4}$  C-B).

$^{31}\text{P}\{^1\text{H}\}$  NMR (161.9 MHz,  $\text{CD}_2\text{Cl}_2$ , 183 K):  $\delta$  112.9 (dd,  $^2J_{\text{PRh}} = 162$  Hz,  $^3J_{\text{PP}} = 16$  Hz; P *trans* to  $\sigma^*$ ), 114.4 (dd,  $^2J_{\text{PRh}} = 162$  Hz,  $^3J_{\text{PP}} = 16$  Hz; P *trans* to  $\sigma^\dagger$ ), 114.9 (dd,  $^2J_{\text{PRh}} = 220$  Hz,  $^3J_{\text{PP}} = 16$  Hz; P *trans* to  $\pi^\dagger$ ), 116.2 (dd,  $^2J_{\text{PRh}} = 205$  Hz,  $^3J_{\text{PP}} = 15$  Hz; P *trans* to  $\pi^*$ ).

$^{31}\text{P}\{^1\text{H}\}$  SSNMR (161.9 MHz, 10 kHz spin rate, 298 K):  $\delta$  113.9 (m,  $\nu_{1/2} = 200$  Hz).

$^{31}\text{P}\{^1\text{H}\}$  SSNMR (161.9 MHz, 10 kHz spin rate, 183 K):  $\delta$  111.1 (br. s,  $\nu_{1/2} = 600$  Hz).

$^{19}\text{F}\{^1\text{H}\}$  NMR (376.5 MHz,  $\text{CD}_2\text{Cl}_2$ , 298 K):  $\delta$  -62.8 ( $\text{Ar}^{\text{F}}\text{-CF}_3$ ).

$^{19}\text{F}\{^1\text{H}\}$  NMR (376.5 MHz,  $\text{CD}_2\text{Cl}_2$ , 183 K):  $\delta$  -62.2 ( $\text{Ar}^{\text{F}}\text{-CF}_3$ ).

$^{11}\text{B}\{^1\text{H}\}$  NMR (128.4 MHz,  $\text{CD}_2\text{Cl}_2$ , 298 K):  $\delta$  -6.63 ( $\text{BAR}^{\text{F}_4^-}$ ).

$^{11}\text{B}\{^1\text{H}\}$  NMR (128.4 MHz,  $\text{CD}_2\text{Cl}_2$ , 183 K):  $\delta -6.87$  ( $\text{BAR}^{\text{F}_4^-}$ ).

*This material does not survive in  $\text{CH}_2\text{Cl}_2$  solution long enough at 298 K to permit mass spectrometry.*

Elemental analysis found (calculated) for  $\text{C}_{54}\text{H}_{60}\text{BF}_{24}\text{P}_2\text{Rh}$ : C, 48.27 (48.38); H, 4.40 (4.51)

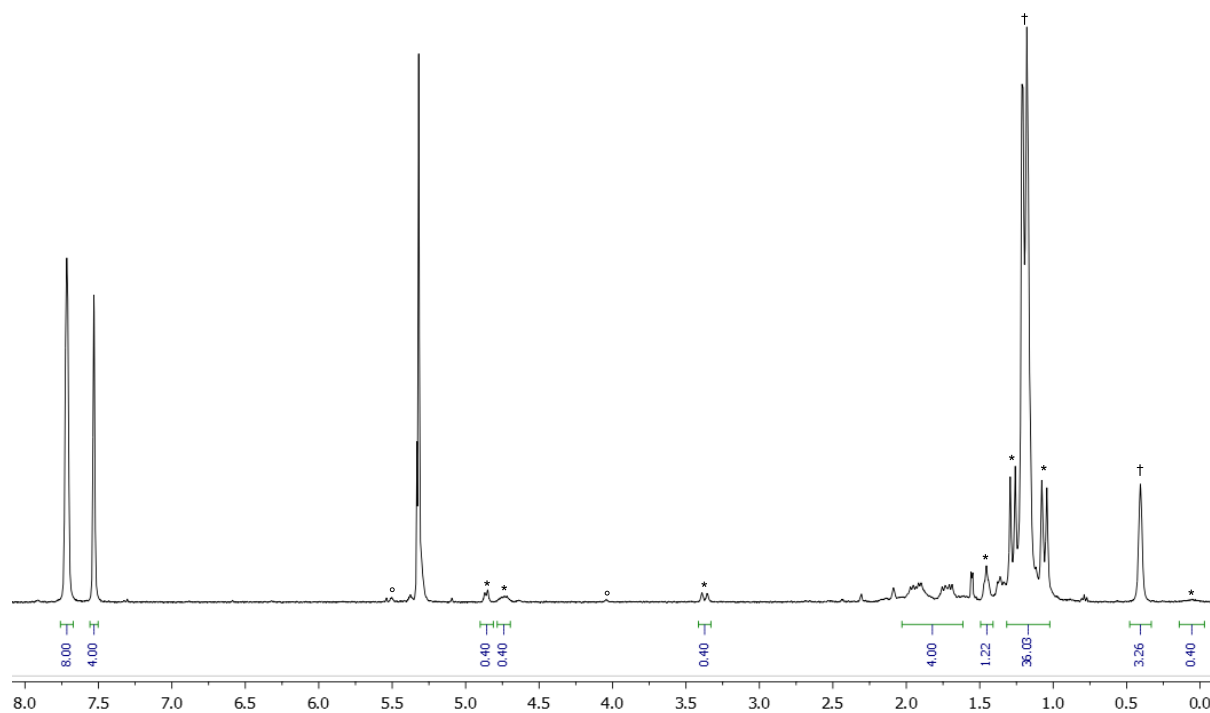

Figure S26:  $^1\text{H}$  NMR spectrum of complex **10/11** (400.1 MHz, 183 K,  $\text{CD}_2\text{Cl}_2$ ). \* corresponds to  $[(\text{dtbpe})\text{Rh}(1\text{-butene})][\text{BAR}^{\text{F}_4}]$ , complex **11** (minor, c. 40%); † corresponds to  $[(\text{dtbpe})\text{Rh}(\text{cis-2-butene})][\text{BAR}^{\text{F}_4}]$ , complex **10** (major, c. 60%). ° corresponds to unreacted **7** (<4%).

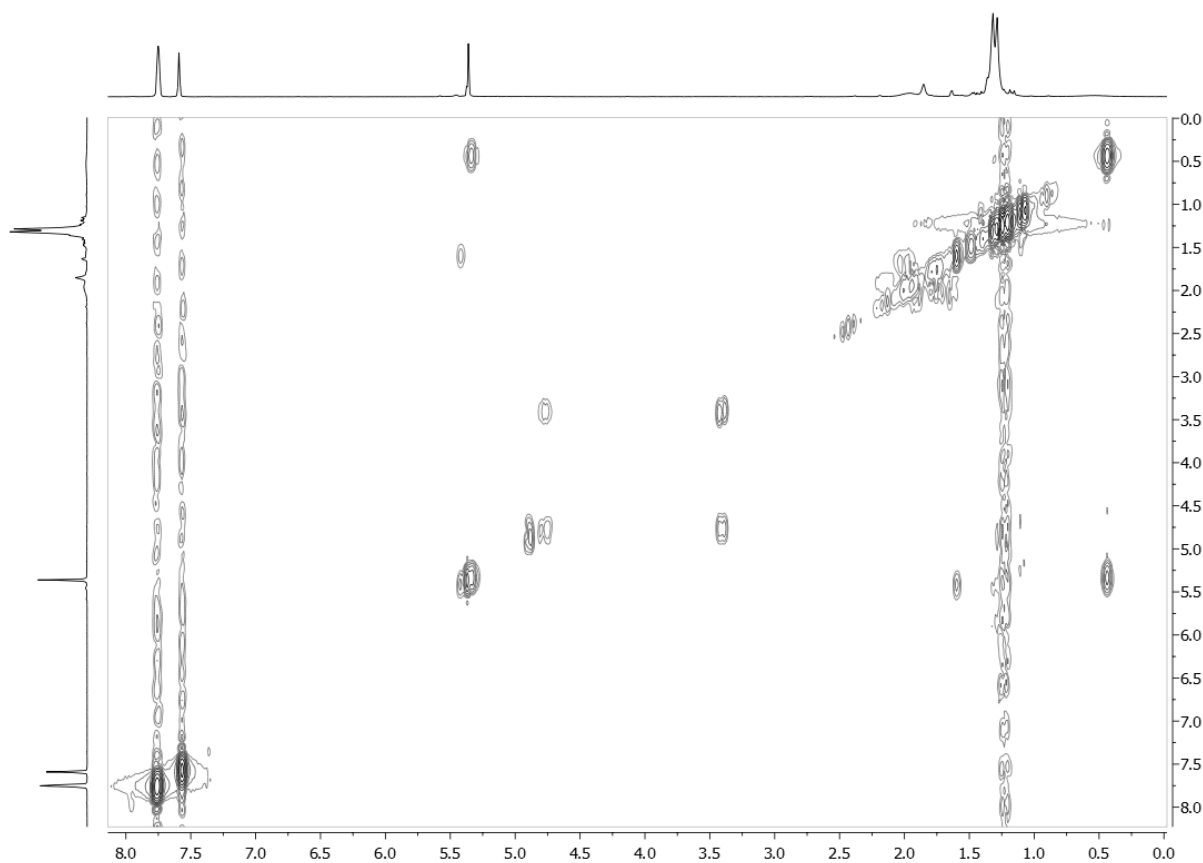

Figure S27:  $^1\text{H}/^1\text{H}$  COSY NMR spectrum of complex **10/11** (400.1 MHz, 183 K,  $\text{CD}_2\text{Cl}_2$ ).

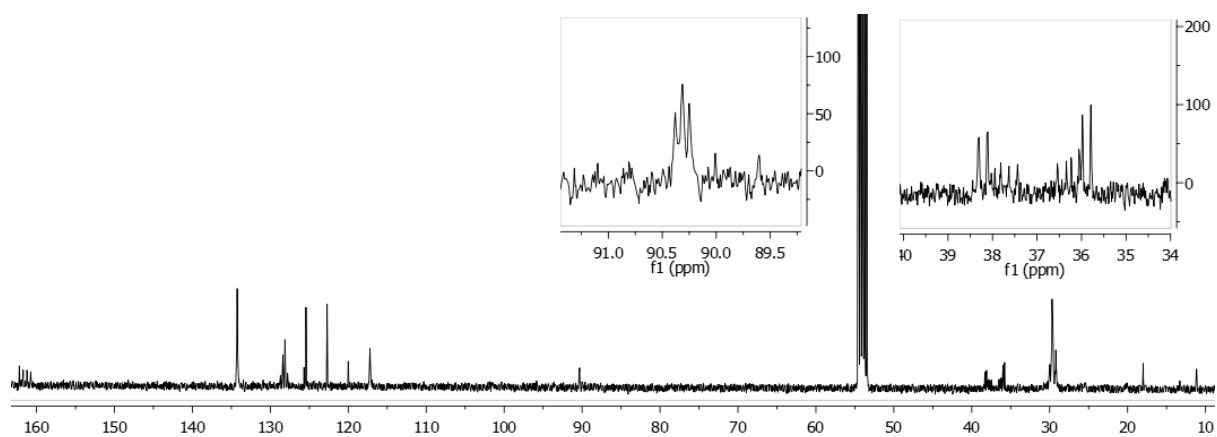

Figure S28:  $^{13}\text{C}\{^1\text{H}\}$  NMR spectrum of complex **10/11** (100.6 MHz, 183 K,  $\text{CD}_2\text{Cl}_2$ ).

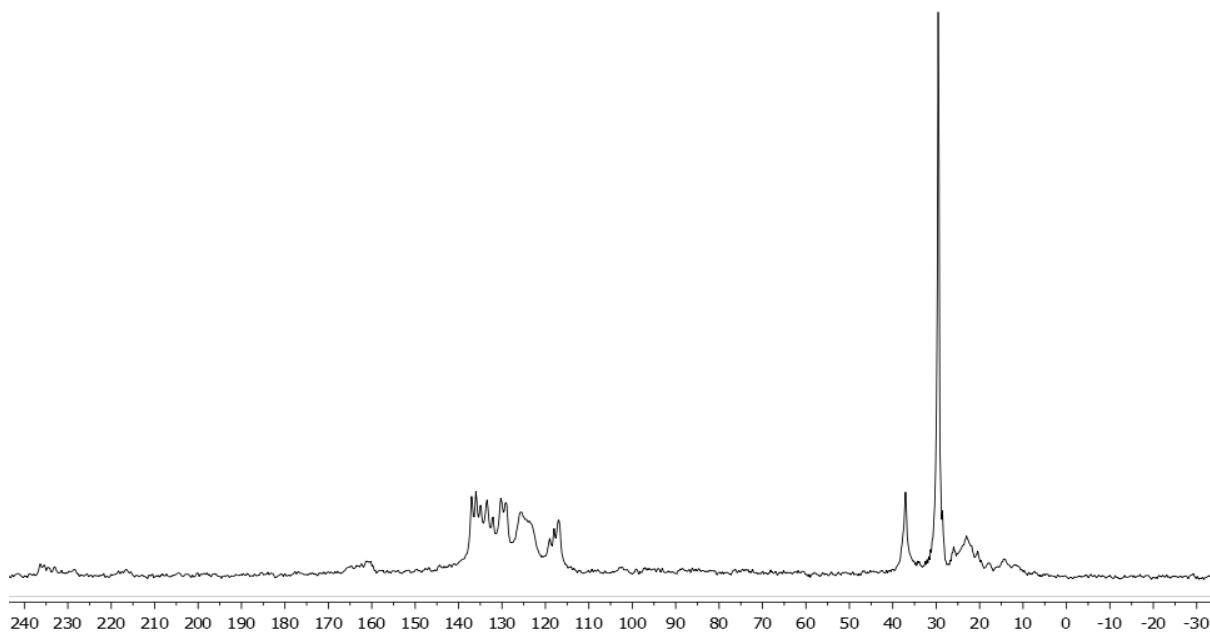

Figure S29:  $^{13}\text{C}\{^1\text{H}\}$  SSNMR spectrum of complex **10/11** (100.6 MHz, spinning speed 10 kHz, 298 K) prepared in situ from **8**.

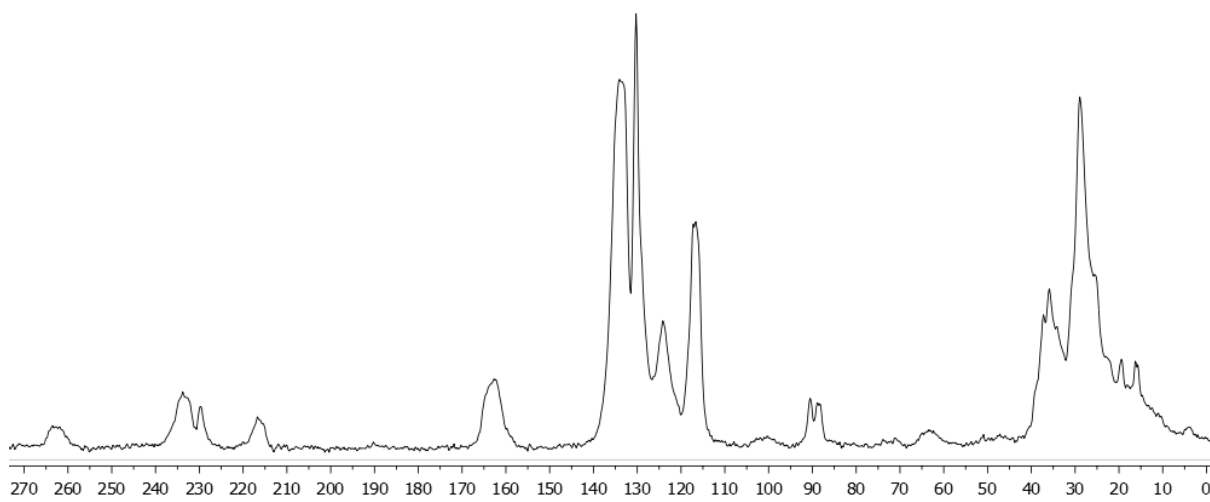

Figure S30:  $^{13}\text{C}\{^1\text{H}\}$  SSNMR spectrum of complex **10/11** (100.6 MHz, spinning speed 10 kHz, 183 K) prepared in situ from **8**.



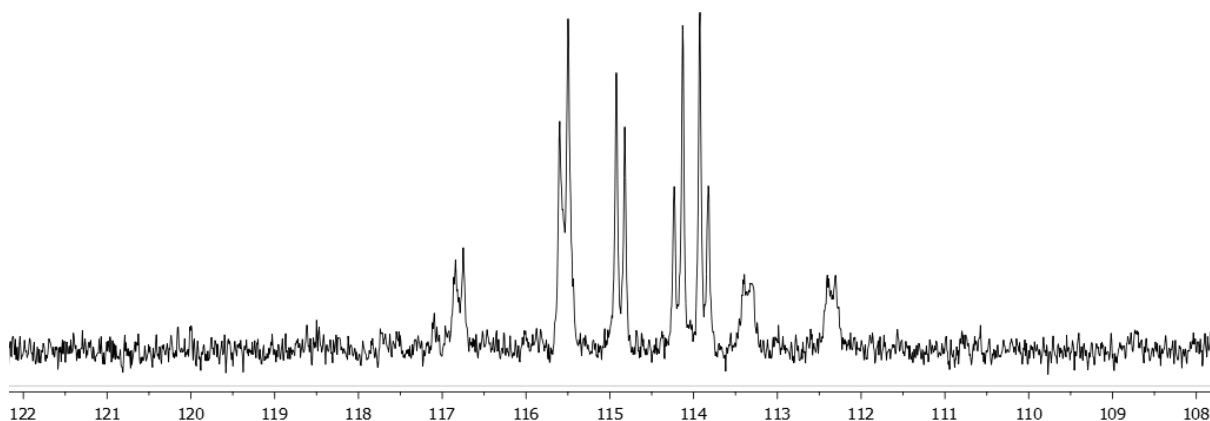

Figure S31:  $^{31}\text{P}\{^1\text{H}\}$  NMR spectrum of complex **10/11** (161.9 MHz, 183 K,  $\text{CD}_2\text{Cl}_2$ )

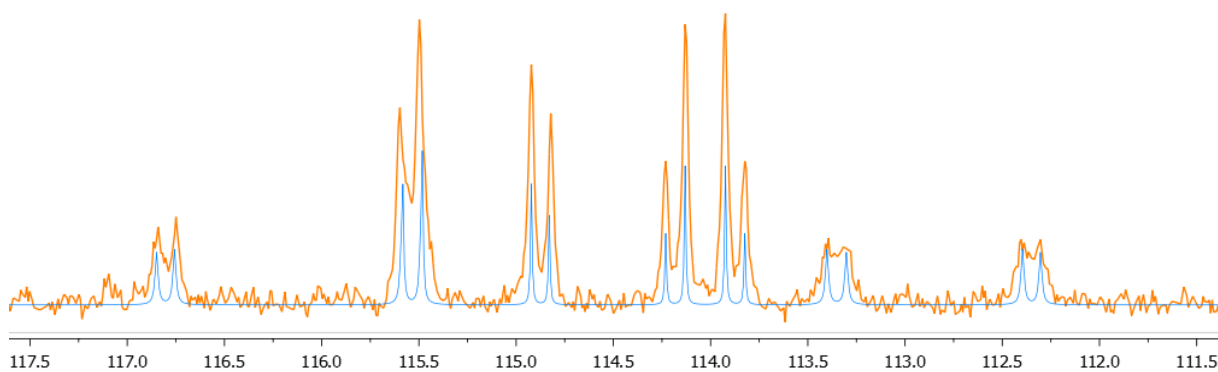

Figure S32:  $^{31}\text{P}\{^1\text{H}\}$  NMR spectrum of complex **10/11** (161.9 MHz, 183 K,  $\text{CD}_2\text{Cl}_2$ ; in orange) including a spin simulation (in blue). Complex **10** is modelled as:  $\delta$  114.38 (dd,  $^2J_{\text{PRh}} = 162$  Hz,  $^3J_{\text{PP}} = 16$  Hz; P trans to  $\sigma$ ), 114.85 (dd,  $^2J_{\text{PRh}} = 220$  Hz,  $^3J_{\text{PP}} = 16$  Hz; P trans to  $\pi$ ), with a 1.5 Hz linewidth. Complex **11** is modelled as:  $\delta$  112.85 (dd,  $^2J_{\text{PRh}} = 162$  Hz,  $^3J_{\text{PP}} = 16$  Hz; P trans to  $\sigma$ ), 116.17 (dd,  $^2J_{\text{PRh}} = 205$  Hz,  $^3J_{\text{PP}} = 15$  Hz; P trans to  $\pi$ ), with a 3.0 Hz linewidth.

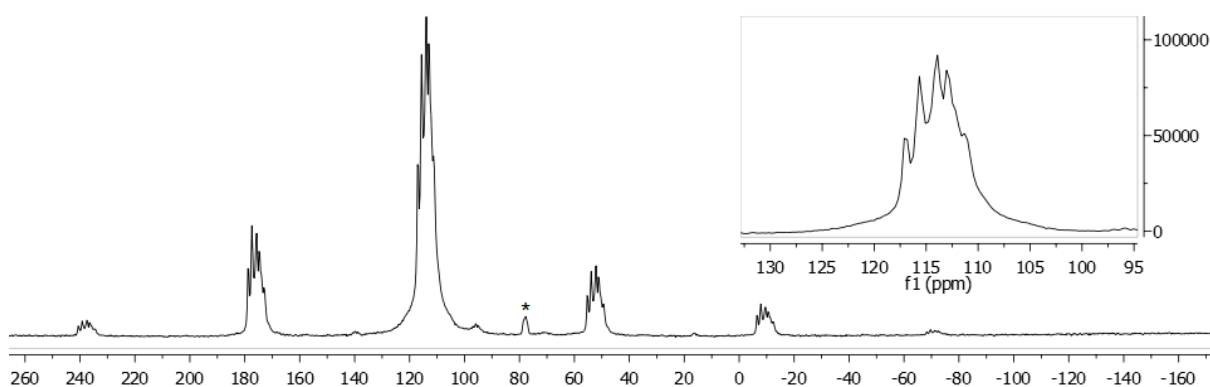

Figure S33:  $^{31}\text{P}\{^1\text{H}\}$  SSNMR spectrum of complex **10/11** (161.9 MHz, spinning speed 10 kHz, 298 K) prepared in situ from **8**. \* indicates unreacted **7**.

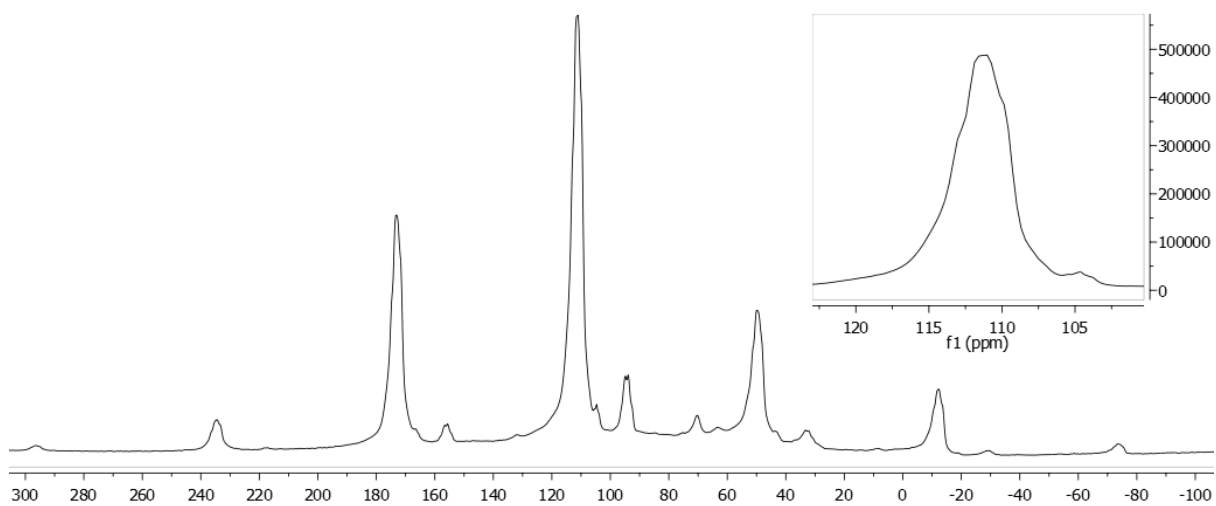

Figure S34:  $^{31}\text{P}\{^1\text{H}\}$  SSNMR spectrum of complex **10/11** (161.9 MHz, spinning speed 10 kHz, 183 K) prepared in situ from **8**.

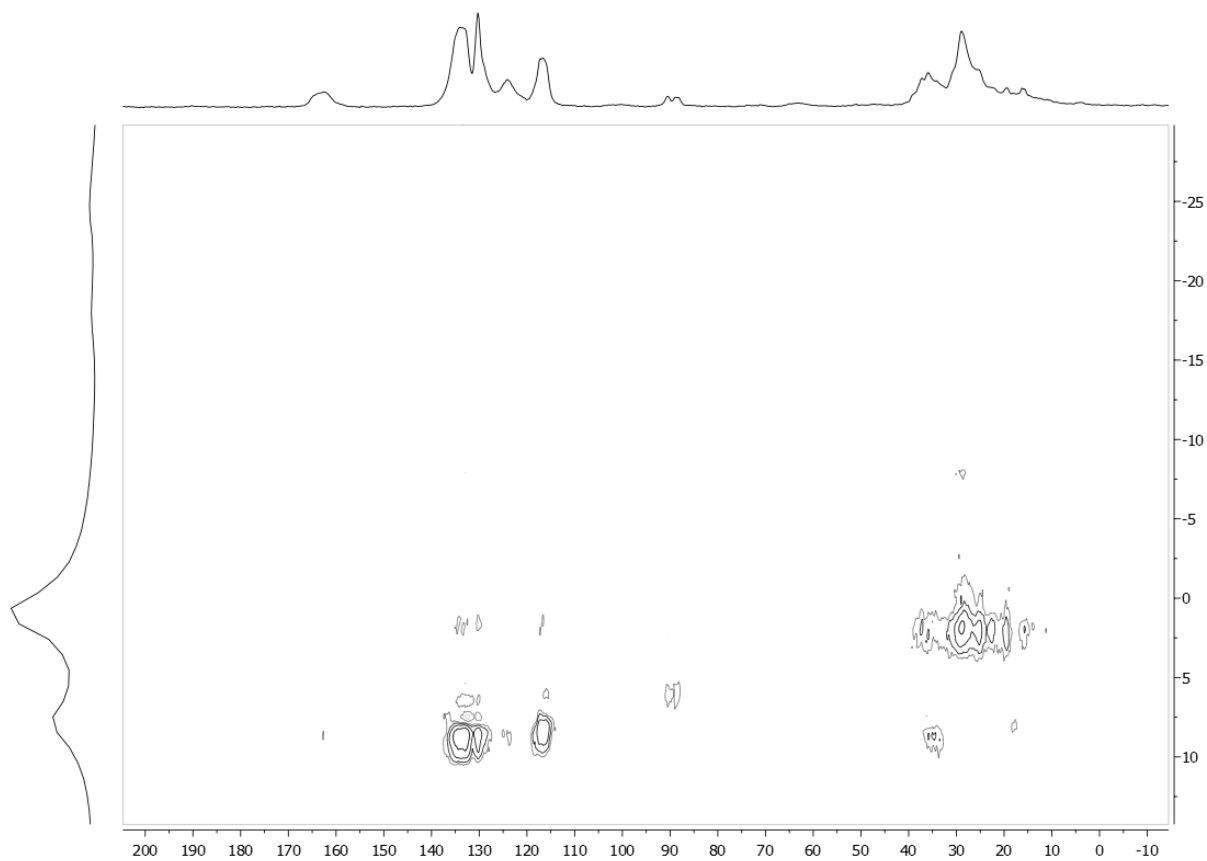

Figure S35:  $^{13}\text{C}/^1\text{H}$  SSNMR HETCOR spectrum of complex **10/11** (spinning speed 10 kHz, 183 K) prepared in situ from **8**.

### S3.4.1 Selected Crystallographic and Refinement Data for Complex 10/11

**Crystal data for 10 and 11 (CCDC 1945266):** C<sub>54</sub>H<sub>60</sub>BF<sub>26</sub>P<sub>2</sub>Rh, M = 1340.68 g/mol, monoclinic, P2<sub>1</sub>/c, a = 13.8945(2), b = 17.8193(2), c = 23.5243(4) Å, β = 96.4570(10)°, V = 5887.44(14) Å<sup>3</sup>, Z = 4, λ(Cu-Kα) = 1.54184 Å, T = 150(1) K, orange plate, ρ(calcd, g cm<sup>-3</sup>) = 1.539, μ (mm<sup>-1</sup>) = 3.936, 55357 reflections collected, 12140 independent measured reflections (R<sub>int</sub> = 0.0531), F<sup>2</sup> refinement, R<sub>1</sub>(obs, I > 2σ(I)) = 0.0410, wR<sub>2</sub>(all data) = 0.1133, 9711 independent observed reflections [|F<sub>o</sub>| > 4σ(|F<sub>o</sub>|)], 2θ<sub>max</sub> = 153.4°, 961 restraints, 988 parameters, GOF = 1.025 and residual electron density (e Å<sup>-3</sup>) = 0.738/-1.021.

### S3.4.2 Supplementary Analysis of the Solid-State Molecular Structure of Complex 10/11 by Single-Crystal X-ray Diffraction

The solid-state molecular structures of the two disordered cations of complexes **10** and **11** are shown in *Figure S35*.

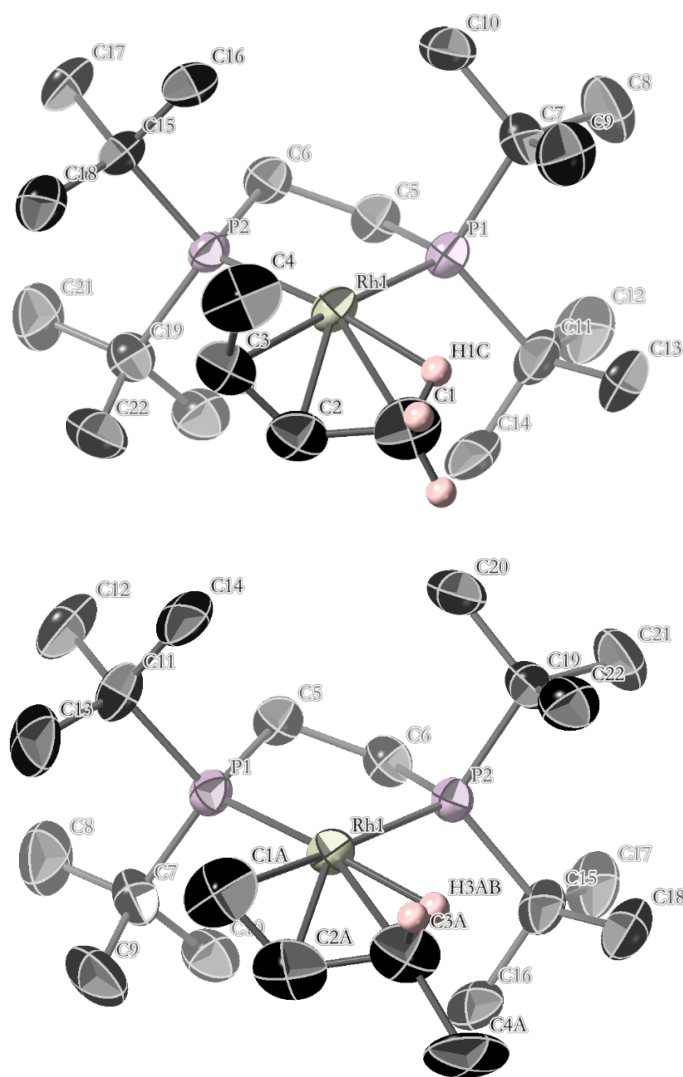

Figure S36: Cationic fragments  $[(dtbpe)Rh(\text{cis-2-butene})]^+$  (**10**) and  $[(dtbpe)Rh(1\text{-butene})]^+$  (**11**) (top and bottom respectively) of  $[(dtbpe)Rh(\text{butenes})][\text{BAR}^F_4]$ . 50% displacement ellipsoids. H atoms omitted for clarity excepting those associated with agostic positions. Selected bond lengths (Å) and angles (deg), where Cent1 is the centroid of C1A–C2A and Cent2 is the centroid of C2–C3: Rh1–P1, 2.2652(9); Rh1–P2, 2.2616(8); Rh1–H3AB, 1.8146(4); Rh1–H1C, 1.8953(3); Rh1–C2, 2.167(7); Rh1–C3, 2.356(10); Rh1–C1A, 2.250(10); Rh1–C2A, 2.155(7); Rh1–Cent1, 2.095(7); Rh1–Cent2, 2.161(6); C1–C2, 1.475(13); C2–C3, 1.346(12); C3–C4, 1.467(14); C1A–C2A, 1.362(13); C2A–C3A, 1.525(15); C3A–C4A, 1.541(18); P2–Rh1–C2, 117.26(19); P2–Rh1–Cent2, 106.99(17); P2–Rh1–C3, 96.6(3); P1–Rh1–C2A, 119.8(2); P1–Rh1–Cent1, 108.6(2); P1–Rh1–C1A, 96.8(3).

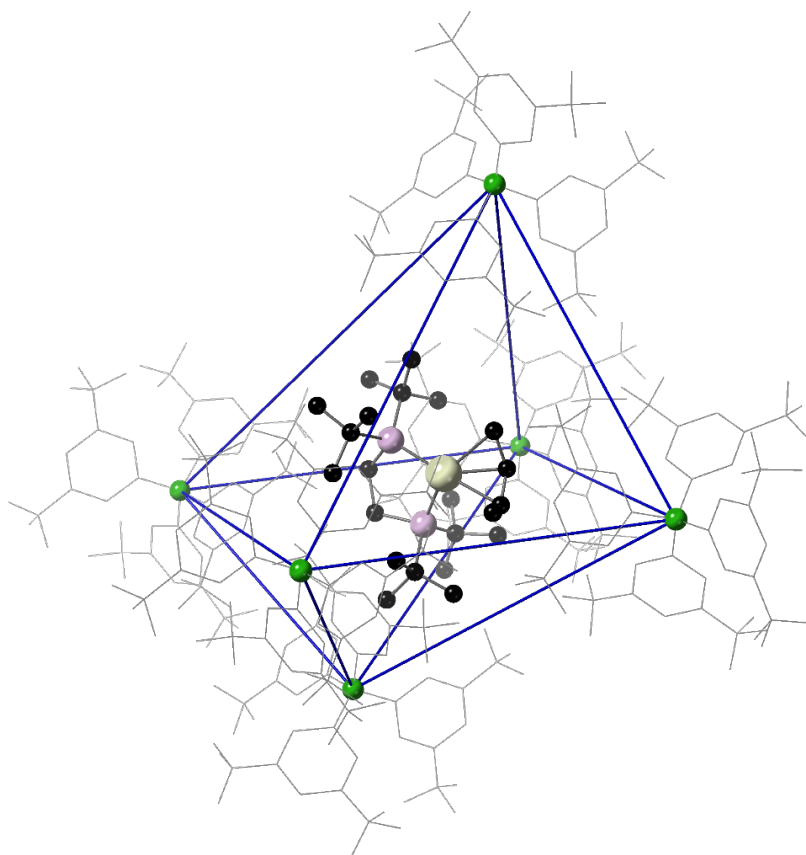

Figure S37: The packing environment of  $[(dtbpe)Rh(\text{butenes})][BARF_4]$  (**10/11**), of which the component  $L = \text{cis-2-butene}$  (**10**) is shown (modelled as ball-and-stick), and its six nearest  $BARF_4^-$  neighbours (modelled as wireframes with B atom balls).

### S3.5 Synthesis and Characterisation of Single-Crystalline C-Cl Activated Product $[(dtbpe)Rh(\mu\text{-CH}_2)(\mu\text{-Cl})_2Rh(dtbp)]_2[BARF_4]_2$ , Complex **12**

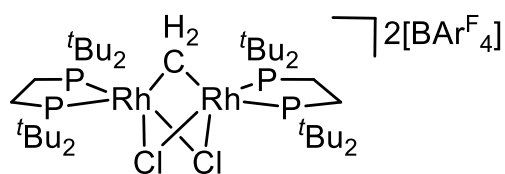

**12**

#### Method I

Fine crystalline **14** (5 mg, 2  $\mu\text{mol}$ , as prepared below) was introduced to an NMR tube fitted with a Young's tap and dissolved in  $\text{CH}_2\text{Cl}_2$  (0.4 mL). After 2 weeks, when only one  $^{31}\text{P}\{^1\text{H}\}$  NMR resonance was observed, the contents of the NMR tube were concentrated by 50% and layered with pentane.

This gave orange crystals of  $[(dtbpe)Rh(\mu-CH_2)(\mu-Cl)_2Rh(dtbppe)][BAr^F_4]_2$ , complex **12** (c. 0.5 mg, c. 10%), after 6 hours. While conversion was quantitative as observed *via* NMR, isolated crystalline yield was poor.

### Method II

Crushed complex **7** (c. 5 mg) was introduced to an NMR tube fitted with a Young's tap. The tube was evacuated and re-pressurised with H<sub>2</sub> (1 bar) for 45 min to give complex **8**, before the H<sub>2</sub> atmosphere was evacuated and the tube was backfilled with argon. CH<sub>2</sub>Cl<sub>2</sub> (0.4 mL) was then introduced at room temperature to dissolve complex **8**. The solution was left for 48 hours before quantitative conversion to complex **12** was obtained, observed *via*  $^{31}P\{^1H\}$  NMR; initially, a broad doublet in the  $^{31}P\{^1H\}$  NMR was visible at  $\delta_P = 120.3$  ppm ( $^1J_{PRh} \sim 220$  Hz).

### Method III

This complex is likewise generated from the quenching of **10/11** in CH<sub>2</sub>Cl<sub>2</sub> at room temperature; after 48 hours at 298 K, complex **12** was obtained quantitatively, observed *via*  $^1H$  and  $^{31}P\{^1H\}$  NMR.

$^1H$  NMR (400.1 MHz, CD<sub>2</sub>Cl<sub>2</sub>, 298 K):  $\delta$  1.42 (d, 18 H,  $^3J_{HP} = 14.9$  Hz; <sup>t</sup>Bu), 1.50 (d, 18 H,  $^3J_{HP} = 14.2$  Hz; <sup>t</sup>Bu), 1.94 (m, 2 H; *dtbpe* CH<sub>2</sub>), 2.18 (s, 2 H; bridging CH<sub>2</sub>), 2.32 (m, 2 H; *dtbpe* CH<sub>2</sub>), 7.56 (s, 4 H; *p*-H), 7.71 (s, 8 H; *o*-H).

$^{31}P\{^1H\}$  NMR (162 MHz, CD<sub>2</sub>Cl<sub>2</sub>, 298 K):  $\delta$  98.0 (br. d,  $^1J_{PRh} \sim 150$  Hz).

$^{19}F\{^1H\}$  NMR (376.5 MHz, CD<sub>2</sub>Cl<sub>2</sub>, 298 K):  $\delta$  -62.8 (Ar<sup>F</sup>-CF<sub>3</sub>).

$^{11}B\{^1H\}$  NMR (128.39 MHz, CD<sub>2</sub>Cl<sub>2</sub>, 298 K):  $\delta$  -6.65 (BAr<sup>F</sup><sub>4</sub><sup>-</sup>).

ESI-MS (CH<sub>2</sub>Cl<sub>2</sub>) *m/z* found (calculated) for C<sub>37</sub>H<sub>82</sub>P<sub>4</sub>Rh<sub>2</sub>Cl<sub>2</sub> [M]<sup>2+</sup>: 463.1460 (463.1422).

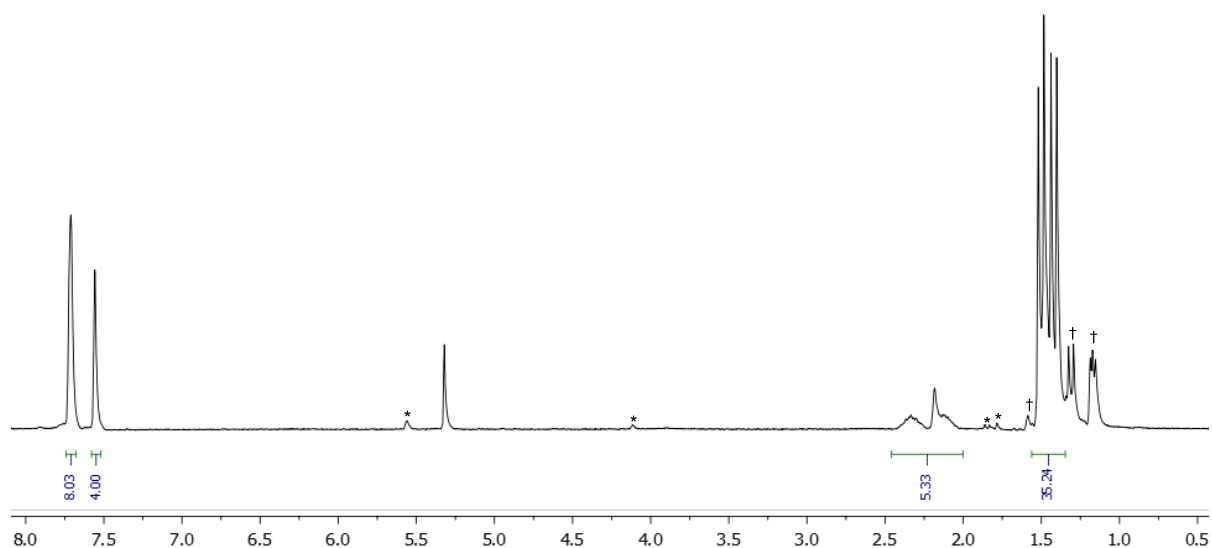

Figure S38:  $^1\text{H}$  NMR spectrum of complex **12** (400.1 MHz, 298 K,  $\text{CD}_2\text{Cl}_2$ ) as generated in situ via Method II. As such, \* corresponds to unreacted **7** (<5%) and † to free NBA.

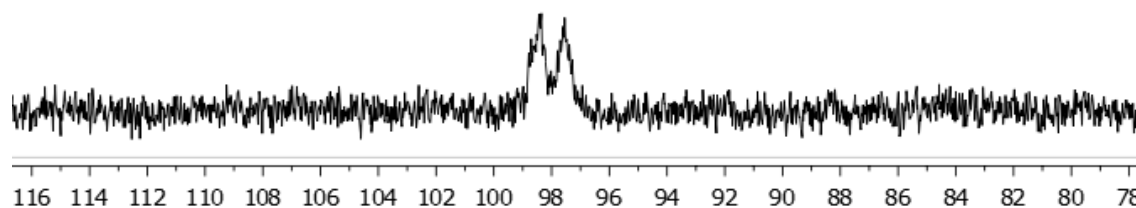

Figure S39:  $^1\text{H}$  NMR spectrum of complex **12** (161.9 MHz, 298 K,  $\text{CD}_2\text{Cl}_2$ ) as generated in situ via Method II.

### S3.5.1 Selected Crystallographic and Refinement Data for Complex 12

**Crystal data for 12 (CCDC 1945268):**  $\text{C}_{101}\text{H}_{106}\text{B}_2\text{Cl}_2\text{F}_{48}\text{P}_4\text{Rh}_2$ ,  $M = 2654.07$  g/mol, orthorhombic,  $P2_12_12$ ,  $a = 24.0564(2)$ ,  $b = 18.6694(2)$ ,  $c = 12.35080(10)$  Å,  $\alpha = \beta = \gamma = 90^\circ$ ,  $V = 5546.97(9)$  Å<sup>3</sup>,  $Z = 2$ ,  $\lambda(\text{Cu-K}\alpha) = 1.54184$  Å,  $T = 150(1)$  K, yellow trapezoid,  $\rho(\text{calcd, g cm}^{-3}) = 1.589$ ,  $\mu(\text{mm}^{-1}) = 4.534$ , 55033 reflections collected, 11519 independent measured reflections ( $R_{\text{int}} = 0.0493$ ),  $F^2$  refinement,  $R_1(\text{obs, } I > 2\sigma(I)) = 0.0441$ ,  $wR_2(\text{all data}) = 0.1130$ , 10839 independent observed reflections [ $|F_o| > 4\sigma(|F_o|)$ ],  $2\theta_{\text{max}} = 152.5^\circ$ , 667 restraints, 869 parameters, GOF = 1.030 and residual electron density ( $\text{e \AA}^{-3}$ ) = 1.878/-0.906.

### S3.5.2 Supplementary Analysis of the Solid-State Molecular Structure of Complex 12 by Single-Crystal X-ray Diffraction

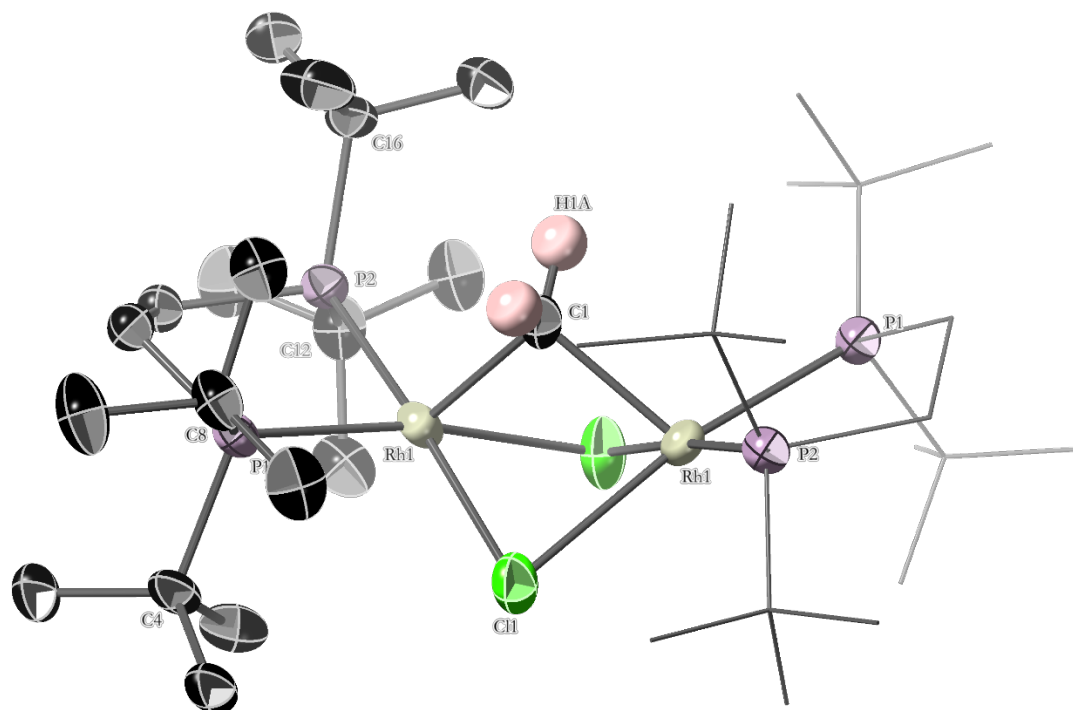

Figure S40: Cationic fragment  $[(dtbpe)Rh(\mu-CH_2)(\mu-Cl)_2Rh(dtbp)]^{2+}$  of **12**. 50% displacement ellipsoids. H atoms omitted for clarity excepting bridging methylene. Selected bond lengths (Å) and angles (deg): Rh1–Rh1, 3.0312(8); Rh1–C1, 2.045(6); Rh1–Cl1, 2.4431(16); Rh1–P1, 2.3165(14); Rh1–P2, 2.3475(15); P1–Rh1–P2, 86.77(5); P1–Rh1–C1, 109.54(13); P2–Rh1–C1, 104.79(13); C1–Rh1–Cl1, 79.72(14); Rh1–Rh1–Cl1, 51.49(4); Cl1–Rh1–Cl1, 82.61(6).

### S3.6 Synthesis and Characterisation of Single-Crystalline $[(dtbpe)Rh(\eta^4-C_4H_6)][BAR^F_4]$ , Complex 13

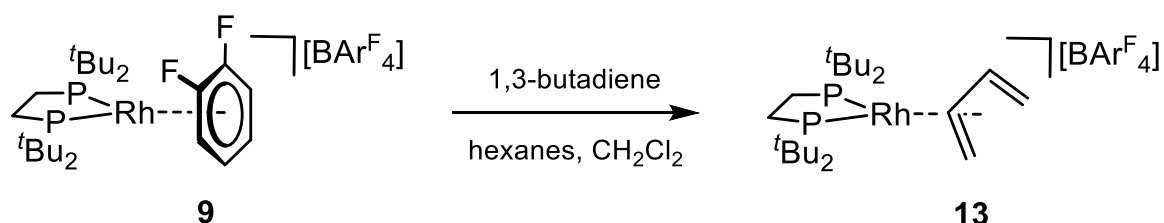

Powdered crystalline complex **7** (25 mg, 18  $\mu$ mol) was introduced to a Young's flask and dissolved in 1,2-difluorobenzene (2 mL). The solution was frozen with liquid  $N_2$  and the flask was evacuated before re-pressurisation with  $H_2$  (1 bar).



After thawing and 30 min of stirring at room temperature, all volatiles were removed *in vacuo* to give the difluorobenzene adduct [(dtbpe)Rh( $\eta^6$ -1,2-difluorobenzene)][BAR<sup>F</sup><sub>4</sub>], complex **9**, as an orange solid. This was then re-dissolved in CH<sub>2</sub>Cl<sub>2</sub> (2 mL), and a solution of 1,3-butadiene in hexanes (0.5 mL, c. 15 wt%, c. 1,000  $\mu$ mol) was introduced.

Stirring was continued for a further 2 hours – over which time the solution turned a deep red – before volatiles were removed *in vacuo*. The product was then redissolved in CH<sub>2</sub>Cl<sub>2</sub> (2 mL) and layered with hexane to give dark purple crystals of [(dtbpe)Rh( $\eta^4$ -C<sub>4</sub>H<sub>6</sub>)][BAR<sup>F</sup><sub>4</sub>] $\cdot$ CH<sub>2</sub>Cl<sub>2</sub>, complex **13** $\cdot$ CH<sub>2</sub>Cl<sub>2</sub> (17 mg, 13  $\mu$ mol, 72%) after 48 hours. The butadiene complex **13** degraded in CH<sub>2</sub>Cl<sub>2</sub> over time to give unknown products, and, unlike the parent NBD complex **7**, was sensitive to moist air. Hydrogenation of a c. 2 mg sample of crushed complex **7** in a high-pressure NMR tube fitted with a Young's tap (controlled atmosphere valve; H<sub>2</sub> 1 bar, 45 min) followed by evacuation and pressurisation with 1-butene (1 bar) at 70 °C for 48 hours generates butadiene complex **13** (c. 95%), confirmed through <sup>1</sup>H and <sup>31</sup>P{<sup>1</sup>H} NMR analysis.

<sup>1</sup>H NMR (400.1 MHz, CD<sub>2</sub>Cl<sub>2</sub>, 298 K):  $\delta$  1.18 (d, 18 H, <sup>3</sup>J<sub>HP</sub> = 13.6 Hz; <sup>t</sup>Bu), 1.40 (d, 18 H, <sup>3</sup>J<sub>HP</sub> = 13.6 Hz; <sup>t</sup>Bu), 2.02 (m, 4 H; CH<sub>2</sub>), 2.71 (dm, 2 H, <sup>3</sup>J<sub>HH</sub> = 14.8 Hz; CH), 4.73 (m, 2 H; CH), 5.52 (m, 2 H; CH), 7.56 (s, 4 H; *p*-H), 7.72 (br. m, 8 H; *o*-H).

<sup>13</sup>C{<sup>1</sup>H} NMR (100.6 MHz, CD<sub>2</sub>Cl<sub>2</sub>, 298 K):  $\delta$  24.3 (m; *dtbpe* CH<sub>2</sub>), 30.2 (s; <sup>t</sup>Bu CH<sub>3</sub>), 31.6 (s; <sup>t</sup>Bu CH<sub>3</sub>), 38.8 (m; <sup>t</sup>Bu C<sub>Q</sub>), 61.9 (q, *J* = 5.5 Hz; butadiene CH<sub>2</sub>), 101.8 (d, *J* = 5.8 Hz; butadiene CH), 118.0 (m; *p*-C<sub>aryl</sub>), 125.1 (q, <sup>1</sup>J<sub>CF</sub> = 273.5 Hz; CF<sub>3</sub>), 129.4 (qq, <sup>2</sup>J<sub>CF</sub> = 31.4 Hz, <sup>4</sup>J<sub>CF</sub> = 2.8 Hz; C<sub>aryl</sub>-CF<sub>3</sub>), 135.3 (s; *o*-C<sub>aryl</sub>), 162.3 (q, <sup>1</sup>J<sub>CB</sub> = 49.9 Hz (<sup>11</sup>B); *i*-C<sub>aryl</sub>).

<sup>13</sup>C{<sup>1</sup>H} SSNMR (100.6 MHz, 10 kHz spin rate, 298 K):  $\delta$  23.2 (*dtbpe* CH<sub>2</sub>), 29.2 (<sup>t</sup>Bu CH<sub>3</sub>), 37.9 (<sup>t</sup>Bu C<sub>Q</sub>), 58.9 (butadiene CH<sub>2</sub>), 61.5 (butadiene CH<sub>2</sub>), 99.3 (butadiene CH), 101.4 (butadiene CH), 115–137 (BAR<sup>F</sup><sub>4</sub>), 163.9 (BAR<sup>F</sup><sub>4</sub> C-B).

<sup>31</sup>P{<sup>1</sup>H} NMR (161.9 MHz, CD<sub>2</sub>Cl<sub>2</sub>, 298 K):  $\delta$  97.8 (br. d, <sup>2</sup>J<sub>PRh</sub> = 173 Hz).

<sup>31</sup>P{<sup>1</sup>H} SSNMR (161.9 MHz, 10 kHz spin rate):  $\delta$  95.5 (s) (*v*<sub>1/2</sub> = 400 Hz).

<sup>19</sup>F{<sup>1</sup>H} NMR (376.5 MHz, CD<sub>2</sub>Cl<sub>2</sub>, 298 K):  $\delta$  -62.9 (Ar<sup>F</sup>-CF<sub>3</sub>).

<sup>11</sup>B{<sup>1</sup>H} NMR (128.9 MHz, CD<sub>2</sub>Cl<sub>2</sub>, 298 K):  $\delta$  -6.61 (BAR<sup>F</sup><sub>4</sub><sup>-</sup>).

ESI-MS (CH<sub>2</sub>Cl<sub>2</sub>) *m/z* found (calculated) for C<sub>29</sub>H<sub>46</sub>P<sub>2</sub>Rh [M]<sup>+</sup>: 475.2145 (475.2124).

Elemental analysis found (calculated) for C<sub>54</sub>H<sub>58</sub>BF<sub>24</sub>P<sub>2</sub>Rh: C, 48.79 (48.45); H, 4.45 (4.37).

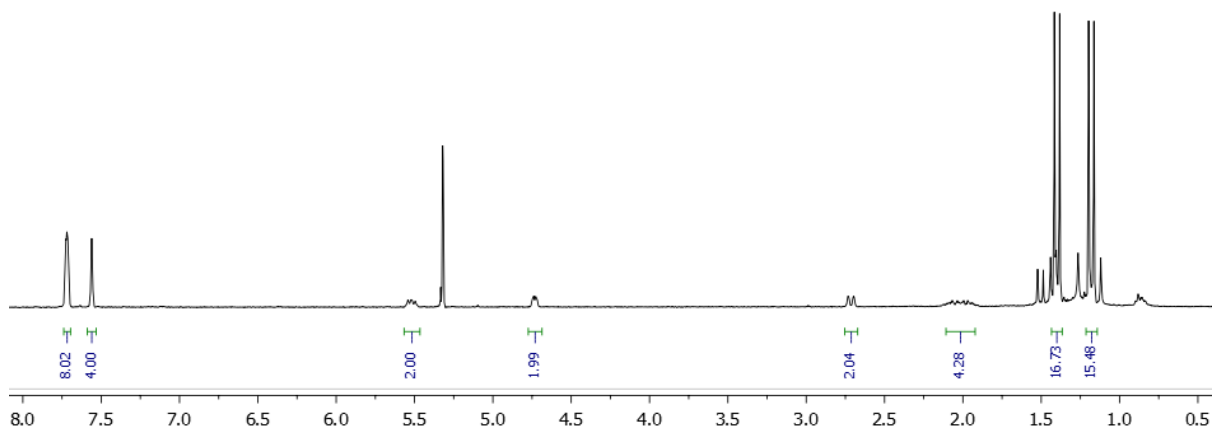

Figure S41:  $^1\text{H}$  NMR spectrum of complex **13** (400.1 MHz, 298 K,  $\text{CD}_2\text{Cl}_2$ ).

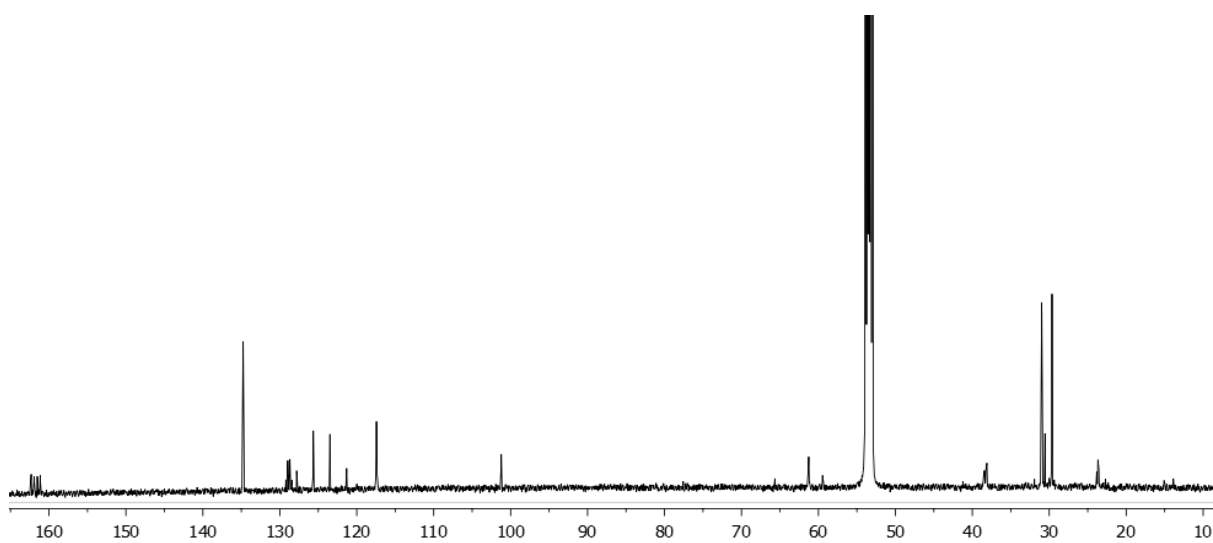

Figure S42:  $^{13}\text{C}\{^1\text{H}\}$  NMR spectrum of complex **13** (100.6 MHz, 298 K,  $\text{CD}_2\text{Cl}_2$ ).

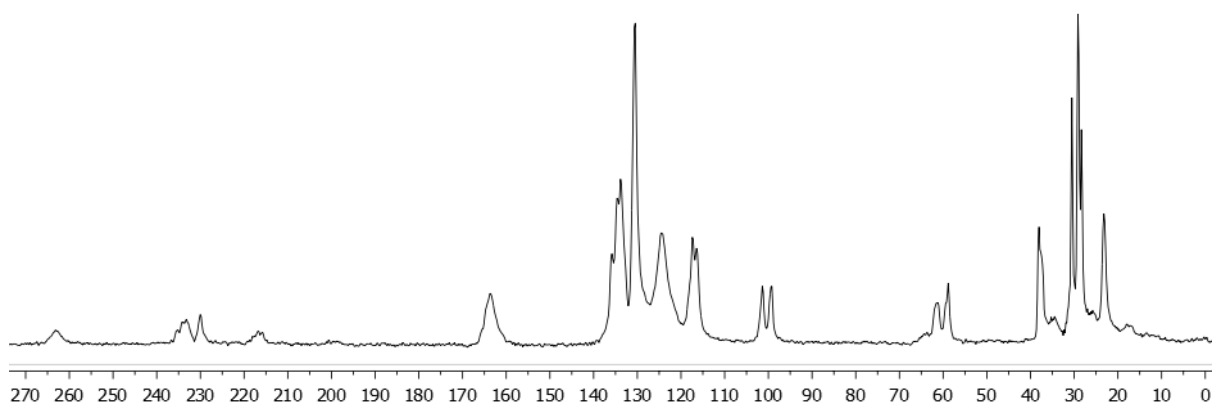

Figure S43:  $^{13}\text{C}\{^1\text{H}\}$  SSNMR spectrum of complex **13** (100.6 MHz, spinning speed 10 kHz, 298 K).

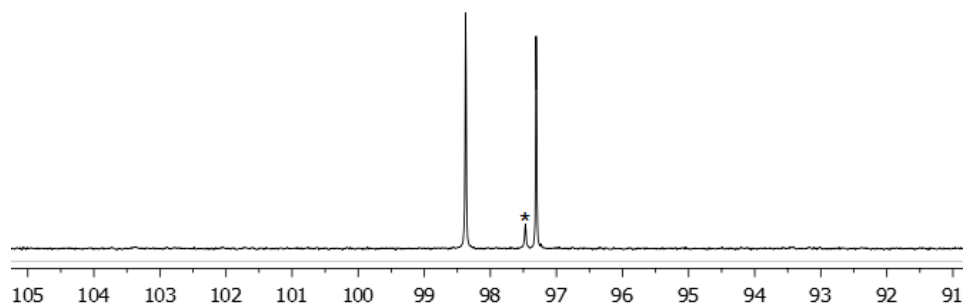

Figure S44:  $^{31}\text{P}\{^1\text{H}\}$  NMR spectrum of complex **13** (161.9 MHz, 298 K,  $\text{CD}_2\text{Cl}_2$ ). \* indicates an unknown degradation product.

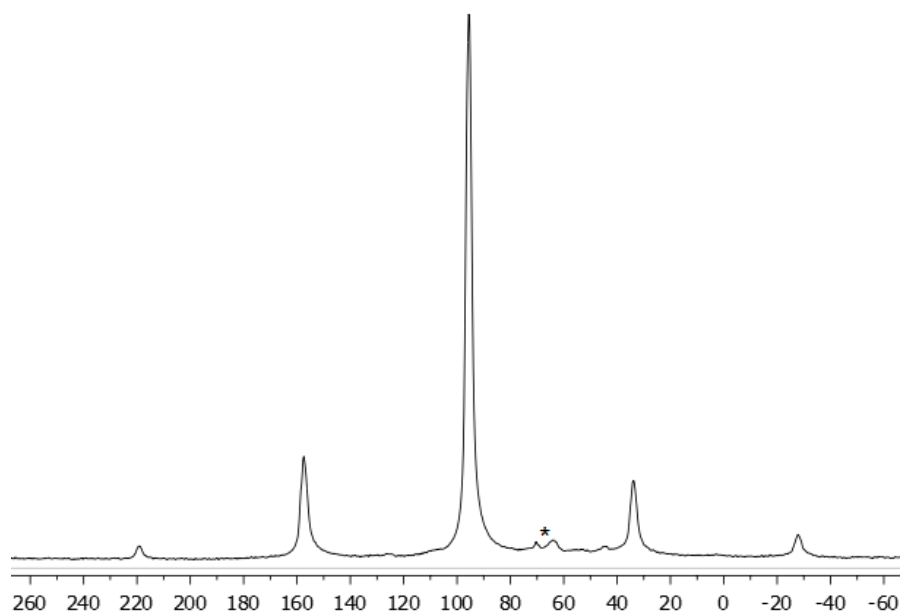

Figure S45:  $^{31}\text{P}\{^1\text{H}\}$  SSNMR spectrum of complex **13** (161.9 MHz, spinning speed 10 kHz, 298 K). \* indicates an unknown degradation product(s).

### S3.6.1 Selected Crystallographic and Refinement Data for Complex 13

**Crystal data for 13 (CCDC 1945267):**  $\text{C}_{54}\text{H}_{58}\text{BF}_{24}\text{P}_2\text{Rh}$ ,  $M = 1338.66$  g/mol, monoclinic,  $P2_1/n$ ,  $a = 17.59335(7)$ ,  $b = 18.77356(10)$ ,  $c = 35.33268(14)$  Å,  $\beta = 91.6093(4)^\circ$ ,  $V = 11665.42(9)$  Å<sup>3</sup>,  $Z = 8$ ,  $\lambda(\text{Cu-K}\alpha) = 1.54184$  Å,  $T = 150(1)$  K, red plate,  $\rho(\text{calcd, g cm}^{-3}) = 1.524$ ,  $\mu(\text{mm}^{-1}) = 3.905$ , 301140 reflections collected, 24335 independent measured reflections ( $R_{\text{int}} = 0.0482$ ),  $F^2$  refinement,  $R_1(\text{obs, } I > 2\sigma(I)) = 0.0332$ ,  $wR_2(\text{all data}) = 0.0874$ , 21819 independent observed reflections [ $|F_o| > 4\sigma(|F_o|)$ ],  $2\theta_{\text{max}} = 153.1^\circ$ ], 1473 restraints, 1827 parameters,  $\text{GOF} = 1.017$  and residual electron density ( $\text{e \AA}^{-3}$ ) = 0.639/-0.745.

### S3.6.2 Supplementary Analysis of the Solid-State Molecular Structure of Complex **13** by Single-Crystal X-ray Diffraction

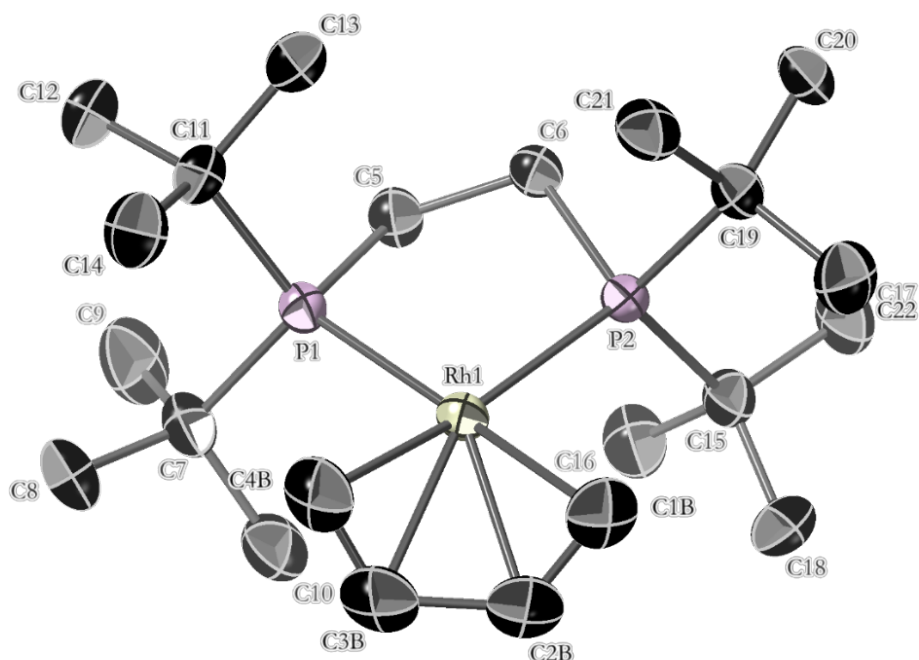

Figure S46: Cationic fragment  $[(dtbpe)Rh(\eta^4-C_4H_6)]^+$  of **13**. 50% displacement ellipsoids. H atoms omitted for clarity. There are two independent fragments  $[(dtbpe)Rh(\eta^4-C_4H_6)]^+$ , from which one disordered position of butadiene is shown (C1B–C4B); the alternative position arises from a c.  $180^\circ$  rotation of the butadiene fragment relative to the  $[(dtbpe)Rh]^+$  fragment. Selected bond lengths (Å) and angles (deg): Rh1–P1, 2.3316(10); Rh1–P2, 2.3244(7); Rh1–C1B, 2.255(11); Rh1–C2B, 2.193(8); Rh1–C3B, 2.199(10); Rh1–C4B, 2.240(14); C1B–C2B, 1.337(17); C2B–C3B, 1.447(15); C3B–C4B, 1.349(18); P1–Rh1–P2, 87.06(3); C1B–C2B–C3B, 121.8(11); C2B–C3B–C4B, 119.4(10).

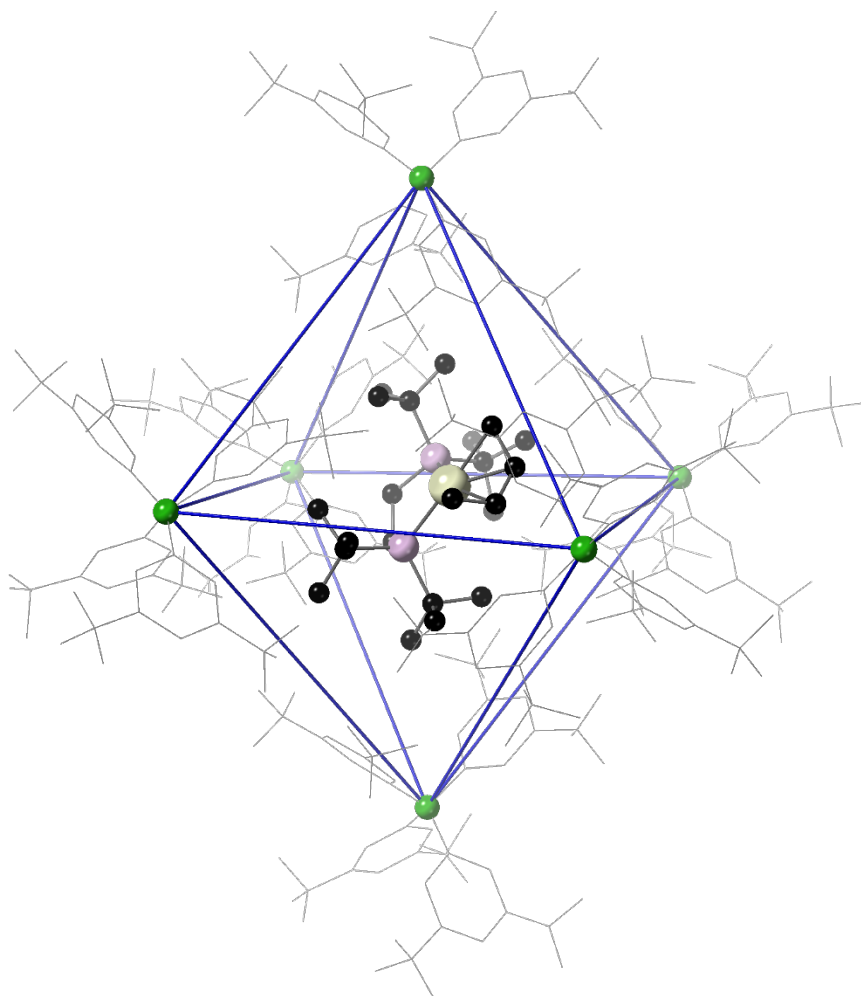

Figure S47: The octahedral packing environment of  $[(dtbpe)Rh(\eta^4-C_4H_6)][BAR^F_4]$ , complex **13**.

### S3.7 Synthesis and Characterisation of Single-Crystalline $\{[(dtbpe)RhH(\mu-H)]_2\}[BAR^F_4]_2$ , Complex **14**

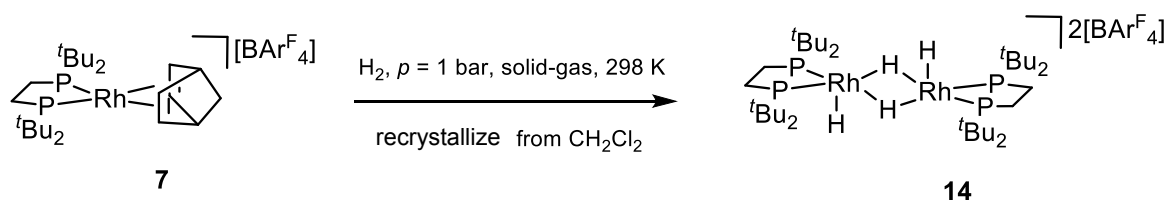

Crushed crystalline **7** (25 mg, 18  $\mu$ mol) was introduced to a Young's flask before the flask was evacuated and re-pressurised with  $H_2$  (1 bar), initially forming complex **8**. After 24 hours, the material had yellowed significantly: the flask was evacuated ( $p < 10^{-2}$  mbar, 5 min) and  $H_2$  (1 bar) was reintroduced; this was repeated after an additional 24 hours.

After a third 24 hour period (72 hours in total), the bright yellow resulting solid was dissolved in CH<sub>2</sub>Cl<sub>2</sub> (1 mL) for crystallisation. This solution was immediately frozen with liquid N<sub>2</sub>, before the headspace was evacuated and re-pressurised with H<sub>2</sub> (1 bar) to prevent dehydrogenation and formation of C-Cl activated complex **12** upon thawing. Crystallisation was carried out at 2 °C, providing bright yellow crystals of {[(dtbpe)RhH(μ-H)]<sub>2</sub>}[BAR<sup>F</sup><sub>4</sub>]<sub>2</sub>, complex **14** (19 mg, 7 μmol, 73%), after 6 hours. The supernatant was removed *via* cannula under pressure of H<sub>2</sub>. Once extracted, the crystals can survive indefinitely under an atmosphere of argon, and are not sensitive to vacuum ( $p = 10^{-3}$  mbar). Dissolution of crystalline complex **14** in CD<sub>2</sub>Cl<sub>2</sub> and immediate NMR interrogation at 183 K produced spectra comparable to the amorphous material produced after 72 hours under H<sub>2</sub> without a crystallisation step. The solution-phase NMR information given below corresponds to this method. This complex was also accessible from the butadiene complex, **13**: a crushed crystalline sample of complex **12** (c. 25 mg, c. 20 μmol) was introduced to a Young's flask before the flask was evacuated and re-pressurised with H<sub>2</sub> (1 bar). A yellow solid was generated almost immediately; NMR studies conducted on the resulting solid at 183 K after 20 min under H<sub>2</sub> confirmed quantitative conversion to the dihydride **14**. This material was also prepared *in situ* for solid-state NMR studies (crystalline **14** was studied by solid-state NMR separately).

#### In Situ Method I from Butenes Complex 10/11

A 4.0 mm zirconia solid-state rotor was packed with c. 25 mg of **7** (c. 20 μmol). Left unsealed, the rotor was introduced<sup>2</sup> to H<sub>2</sub> (1 bar) for 50 min to give complex **8**, before evacuation and re-pressurisation with 1-butene (1 bar) for 48 hours to give complex **10/11**. Evacuation and re-pressurisation with H<sub>2</sub> (1 bar) for a further 50 min gave complex **14**. The rotor was capped under a flow of H<sub>2</sub> before solid-state NMR studies were undertaken.

#### In Situ Method II Directly from Complex 8

A 4.0 mm zirconia solid-state rotor was packed with c. 25 mg of **7** (c. 20 μmol). Left unsealed, the rotor was introduced<sup>2</sup> to H<sub>2</sub> (1 bar) for 50 min to give complex **8**, followed by evacuation and a second charge of H<sub>2</sub> (1 bar) for 16 hours. The rotor was capped under a flow of H<sub>2</sub> before solid-state NMR studies were undertaken.

*Due to the tendency of this species to slowly degrade in solution coupled with its generally poor solubility, a clean solution-phase <sup>13</sup>C{<sup>1</sup>H} spectrum could not be achieved. Such a tendency to degrade also prevented the acquisition of elemental microanalysis data.*

<sup>1</sup>H NMR (400.1 MHz, CD<sub>2</sub>Cl<sub>2</sub>, 298 K): δ 1.36 (d, 36 H, <sup>3</sup>J<sub>HP</sub> = 12.8 Hz; <sup>t</sup>Bu), 2.23 (d, 4 H, <sup>2</sup>J<sub>HP</sub> = 12.0 Hz; CH<sub>2</sub>), 7.56 (s, 4 H; *p*-H), 7.72 (s, 8 H; *o*-H), *Rh-H* poorly resolved.

<sup>1</sup>H NMR (400.1 MHz, CD<sub>2</sub>Cl<sub>2</sub>, 183 K): δ -27.6 (br. d, <sup>1</sup>J<sub>HRh</sub> ~ 48 Hz, 2 H; terminal Rh-H), -4.70 (br. tt, <sup>1</sup>J<sub>HRh</sub> ~ 30 Hz, <sup>2</sup>J<sub>HP</sub> ~ 65 Hz, 2 H; bridging Rh-H), 1.17 (br. d, <sup>3</sup>J<sub>PH</sub> ~ 9 Hz, 18H; <sup>t</sup>Bu), 1.27

(br. d,  $^3J_{\text{PH}} \sim 8$  Hz, 18 H;  $^t\text{Bu}$ ), 2.00 (br. s, 2 H;  $\text{CH}_2$ ), 2.12 (br. s, 2 H;  $\text{CH}_2$ ), 7.52 (s, 4 H;  $p\text{-H}$ ), 7.70 (s, 8 H;  $o\text{-H}$ ).

$^1\text{H}\{^{31}\text{P}\}$  NMR (400.1 MHz,  $\text{CD}_2\text{Cl}_2$ , 183 K):  $\delta$  -27.6 (br. d,  $^1J_{\text{HRh}} \sim 48$  Hz, 2 H; terminal Rh-H), -4.70 (br. tt,  $^1J_{\text{HRh}} \sim 30$  Hz,  $^2J_{\text{HH}} \sim 25$  Hz, 2 H; bridging Rh-H), 1.18 (s, 18 H;  $^t\text{Bu}$ ), 1.27 (s, 18 H;  $^t\text{Bu}$ ), 2.00 (br. s, 2 H;  $\text{CH}_2$ ), 2.12 (br. s, 2 H;  $\text{CH}_2$ ), 7.52 (s, 4 H;  $p\text{-H}$ ), 7.70 (s, 8 H;  $o\text{-H}$ ).

$^{13}\text{C}\{^1\text{H}\}$  SSNMR (100.6 MHz, 10 kHz spin rate, 298 K):  $\delta$  22.3 (dtbpe  $\text{CH}_2$ ), 29.1 ( $^t\text{Bu}$   $\text{CH}_3$ ), 37.6 ( $^t\text{Bu}$   $\text{C}_\text{Q}$ ), 117–136 ( $\text{BAr}^{\text{F}}_4$ ), 161.8 ( $\text{BAr}^{\text{F}}_4$  C-B).

$^{31}\text{P}\{^1\text{H}\}$  NMR (161.9 MHz,  $\text{CD}_2\text{Cl}_2$ , 298 K):  $\delta$  123.0 (dm,  $^2J_{\text{PRh}} \sim 108$  Hz,  $^2J_{\text{PP}'} \sim 20$  Hz).

$^{31}\text{P}\{^1\text{H}\}$  NMR (161.9 MHz,  $\text{CD}_2\text{Cl}_2$ , 183 K):  $\delta$  121.9 (dm,  $^2J_{\text{PRh}} \sim 108$  Hz,  $^2J_{\text{PP}'} \sim 20$  Hz).

$^{31}\text{P}\{^1\text{H}\}$  SSNMR (161.9 MHz, 10 kHz spin rate, 298 K):  $\delta$  117.7 (br. d,  $^1J_{\text{PRh}} \sim 180$  Hz).

$^{19}\text{F}\{^1\text{H}\}$  NMR (376.5 MHz,  $\text{CD}_2\text{Cl}_2$ , 298 K):  $\delta$  -62.8 ( $\text{Ar}^{\text{F}}\text{-CF}_3$ ).

$^{19}\text{F}\{^1\text{H}\}$  NMR (376.5 MHz,  $\text{CD}_2\text{Cl}_2$ , 183 K):  $\delta$  -62.2 ( $\text{Ar}^{\text{F}}\text{-CF}_3$ ).

$^{11}\text{B}\{^1\text{H}\}$  NMR (128.4 MHz,  $\text{CD}_2\text{Cl}_2$ , 298 K):  $\delta$  -6.63 ( $\text{BAr}^{\text{F}}_4^-$ ).

$^{11}\text{B}\{^1\text{H}\}$  NMR (128.4 MHz,  $\text{CD}_2\text{Cl}_2$ , 183 K):  $\delta$  -6.87 ( $\text{BAr}^{\text{F}}_4^-$ ).

ESI-MS ( $\text{CH}_2\text{Cl}_2$ )  $m/z$  found (calculated) for  $\text{C}_{36}\text{H}_{80}\text{P}_4\text{Rh}_2$   $[\text{M}]^{2+}$ : 423.1853 (423.1811).

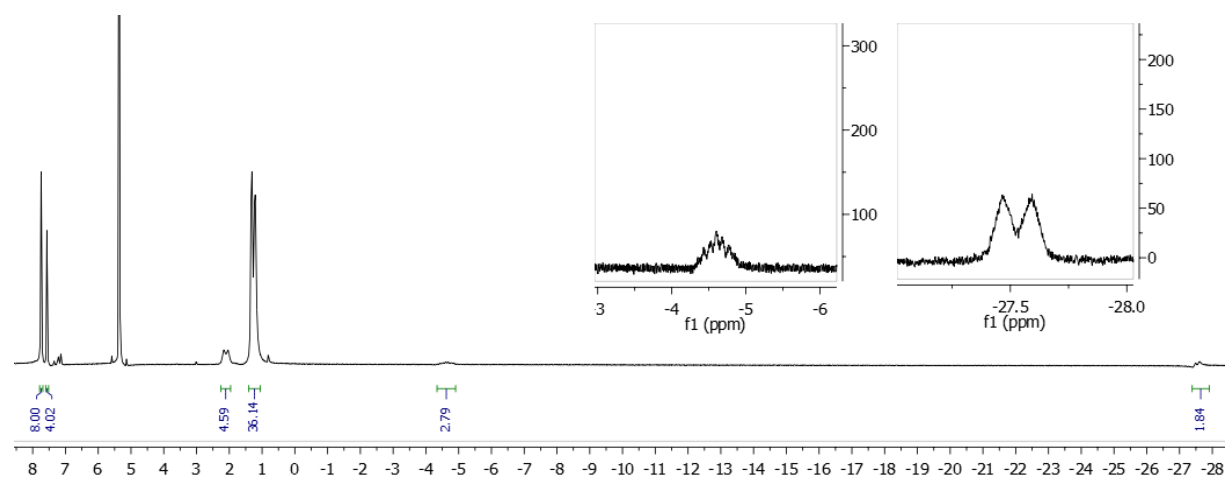

Figure S48:  $^1\text{H}$  NMR spectrum of complex **14** (400.1 MHz, 183 K,  $\text{CD}_2\text{Cl}_2$ ). The metal hydrides are detailed.

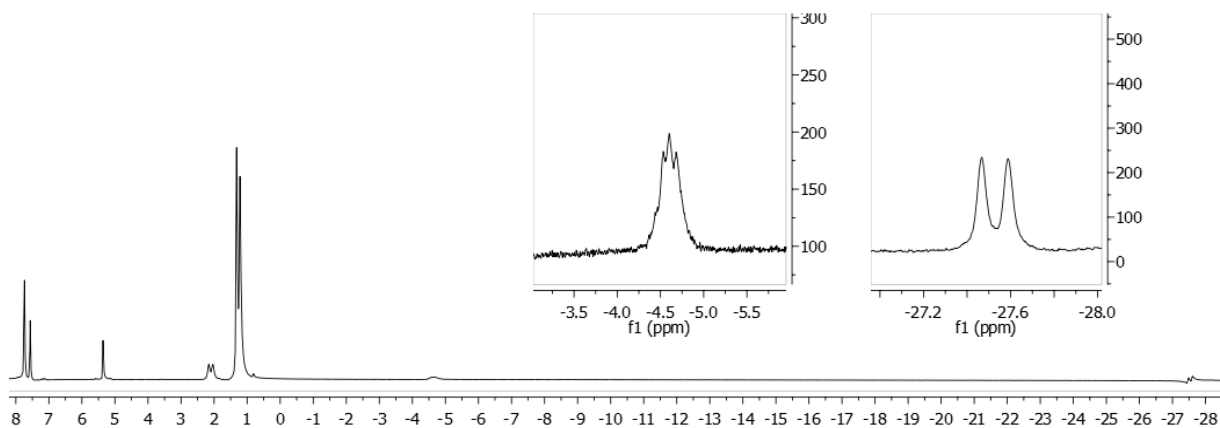

Figure S49:  $^1\text{H}\{^{31}\text{P}\}$  NMR spectrum of complex **14** (400.1 MHz, 183 K,  $\text{CD}_2\text{Cl}_2$ ). The metal hydrides remain detailed.

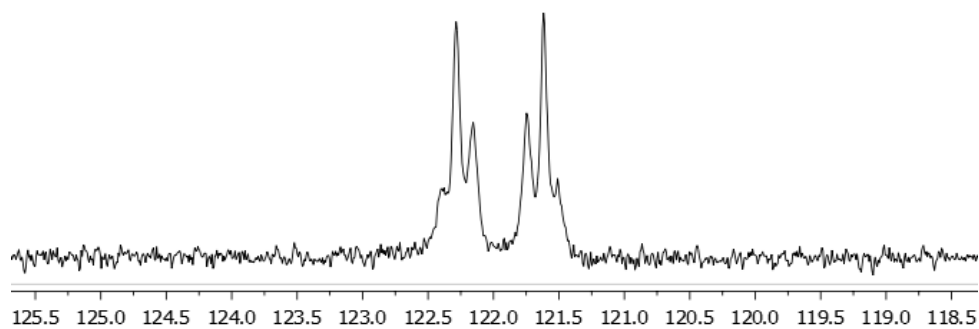

Figure S50:  $^{31}\text{P}\{^1\text{H}\}$  NMR spectrum of complex **14** (161.9 MHz, 183 K,  $\text{CD}_2\text{Cl}_2$ ).

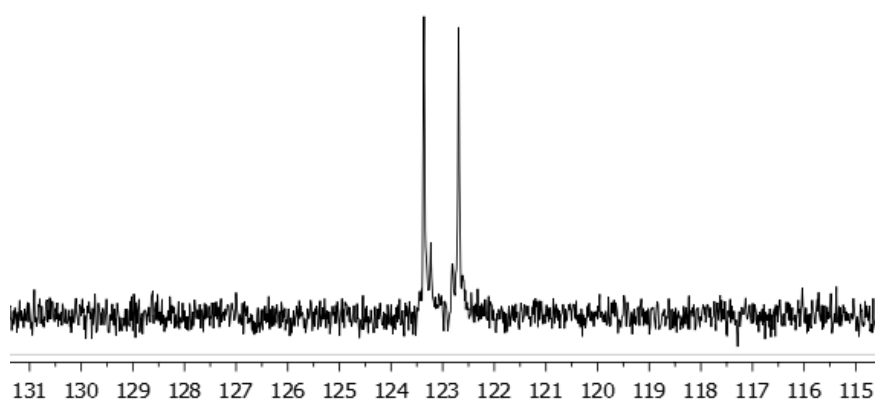

Figure S51:  $^{31}\text{P}\{^1\text{H}\}$  NMR spectrum of complex **14** (161.9 MHz, 298 K,  $\text{CD}_2\text{Cl}_2$ ).



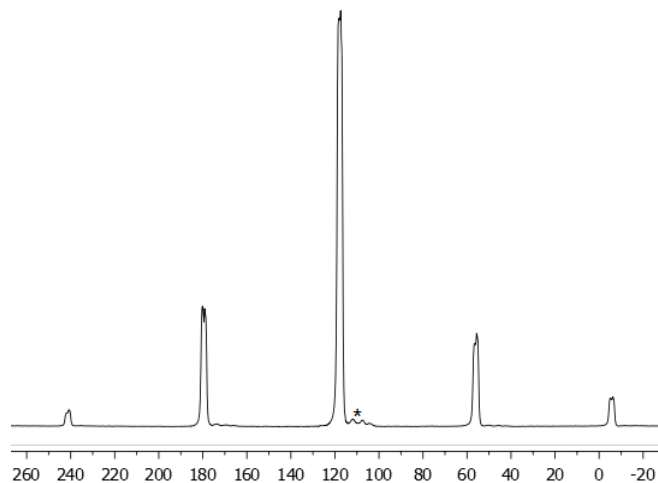

Figure S52:  $^{31}\text{P}\{^1\text{H}\}$  SSNMR spectrum of recrystallized complex **14** (161.9 MHz, spinning speed 10 kHz, 298 K). \* indicates an unknown impurity.

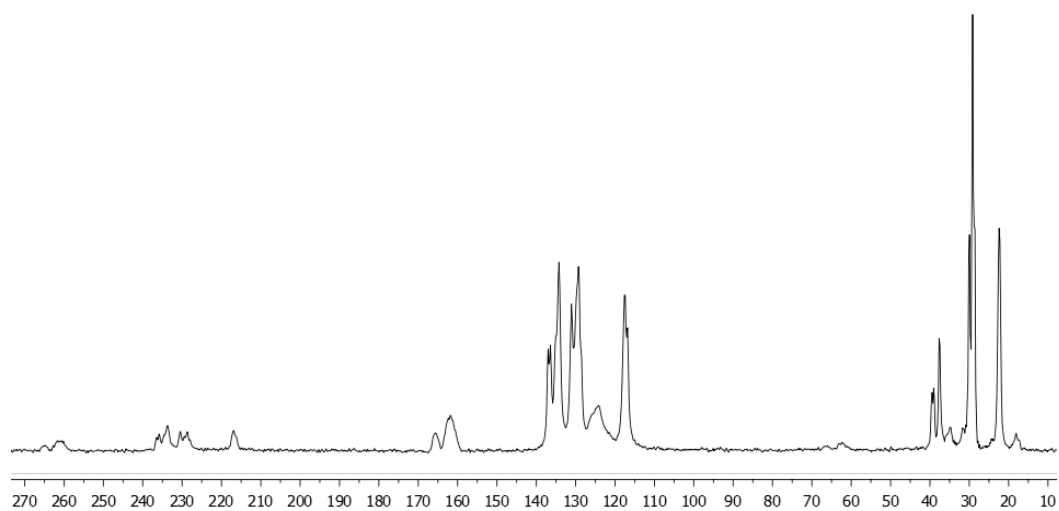

Figure S53:  $^{13}\text{C}\{^1\text{H}\}$  SSNMR spectrum of recrystallized complex **14** (100.6 MHz, spinning speed 10 kHz, 298 K).

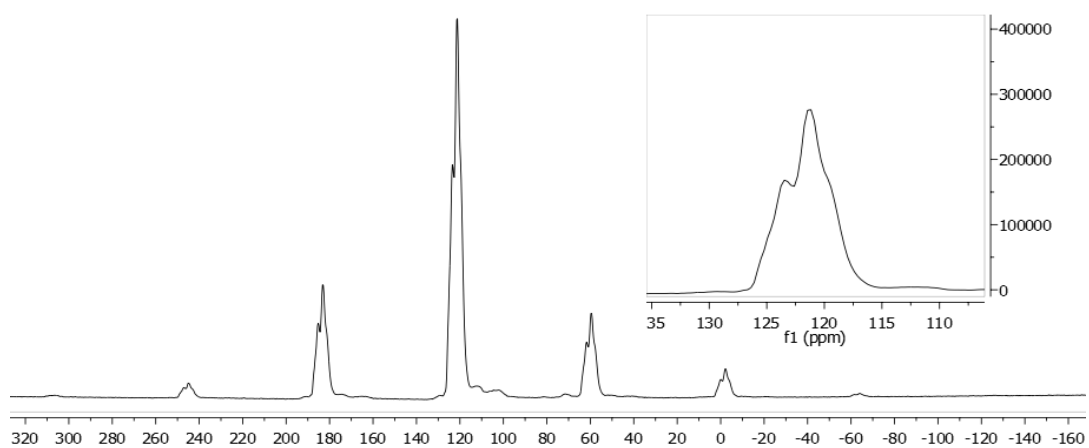

Figure S54:  $^{31}\text{P}\{^1\text{H}\}$  SSNMR spectrum of in situ-prepared complex **14** (161.9 MHz, spinning speed 10 kHz, 298 K; Method I).

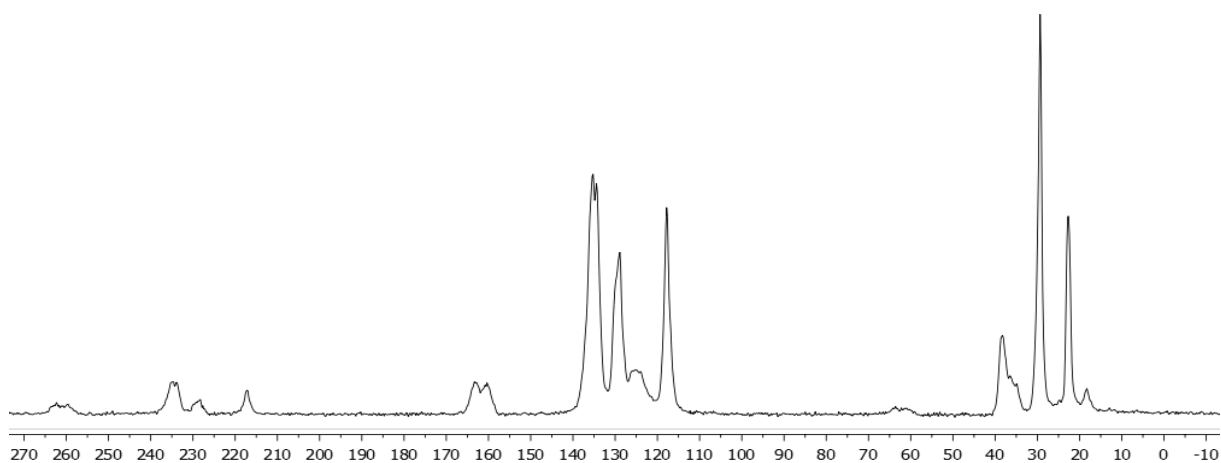

Figure S55:  $^{13}\text{C}\{^1\text{H}\}$  SSNMR spectrum of in situ-prepared complex **14** (100.6 MHz, spinning speed 10 kHz, 298 K; Method I).

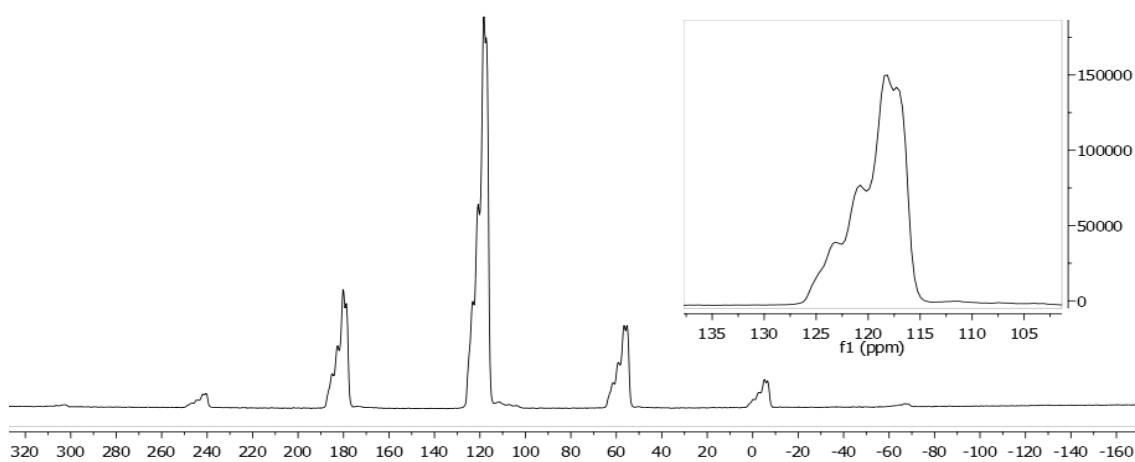

Figure S56:  $^{31}\text{P}\{^1\text{H}\}$  SSNMR spectrum of in situ-prepared complex **14** (161.9 MHz, spinning speed 10 kHz, 298 K; Method II).

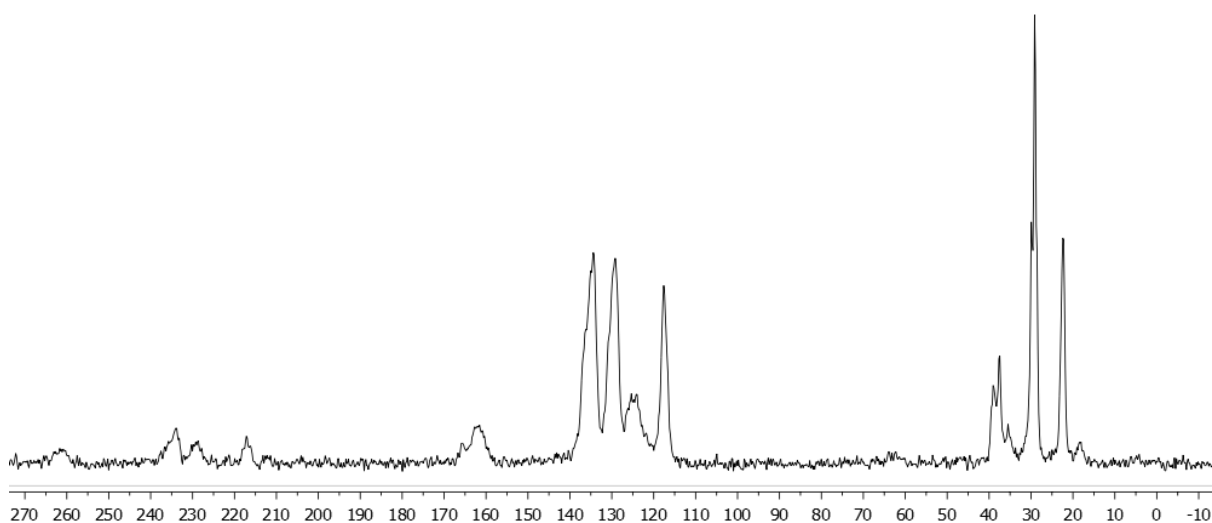

Figure S57:  $^{13}\text{C}\{^1\text{H}\}$  SSNMR spectrum of in situ-prepared complex **14** (100.6 MHz, spinning speed 10 kHz, 298 K; Method II).

### **S3.7.1 Selected Crystallographic and Refinement Data for Complex 14**

**Crystal data for 14 (CCDC 1945341):** C<sub>50</sub>H<sub>53.94</sub>BF<sub>24</sub>P<sub>2</sub>Rh, M = 1286.52 g/mol, triclinic, *P*-1, a = 13.4962(5), b = 15.0316(4), c = 15.0479(3) Å, α = 86.520(2), β = 82.231(2), γ = 64.563(3)°, V = 2731.48(15) Å<sup>3</sup>, Z = 2, λ(Cu-Kα) = 1.54184 Å, T = 150(1) K, yellow plate, ρ(calcd, g cm<sup>-3</sup>) = 1.564, μ (mm<sup>-1</sup>) = 4.143, 33491 reflections collected, 11281 independent measured reflections (*R*<sub>int</sub> = 0.0347), *F*<sup>2</sup> refinement, *R*<sub>1</sub>(obs, *I* > 2σ(*I*)) = 0.0413, *wR*<sub>2</sub>(all data) = 0.1094, 10152 independent observed reflections [*|F<sub>o</sub>|* > 4σ(*|F<sub>o</sub>|*)], 2θ<sub>max</sub> = 152.5°, 1438 restraints, 959 parameters, GOF = 1.020 and residual electron density (e Å<sup>-3</sup>) = 0.739/-0.579.

#### **checkCIF/PLATON report**

##### **Alert level B**

PLAT315\_ALERT\_2\_B Singly Bonded Carbon Detected (H-atoms Missing).

PLAT780\_ALERT\_1\_B Coordinates do not Form a Properly Connected Set

**In answer to checkCIF/PLATON alert level B:** The origin of this singly bonded carbon and the set of coordinates can be obviated as it relates to a disordered minor component for the cationic Rh fragment (chemical occupancy = 3.3%). This can be removed by removing the disordered component, but this results in an elevated R-factor and high electron density spots. This model is best described as disordered.

### **S3.7.2 Supplementary Analysis of the Solid-State Molecular Structure of Complex 14 by Single-Crystal X-ray Diffraction**

The crystals yielded above were amenable to single crystal X-ray diffraction studies. The fragment  $\{[(dtbpe)RhH(\mu-H)]_2\}^{2+}$  is disordered over two main domains with chemical occupancies 0.97:0.03 (*Figure S57*) and is surrounded by 12 BAr<sub>4</sub><sup>-</sup> counteranions, with six nearest neighbours arranged into a distorted octahedron. The hydrides belonging to the major disordered component (97%) of the cationic fragment  $\{[(dtbpe)RhH(\mu-H)]_2\}^{2+}$  were located in the difference Fourier map and refined. Only the major component is shown and discussed below.

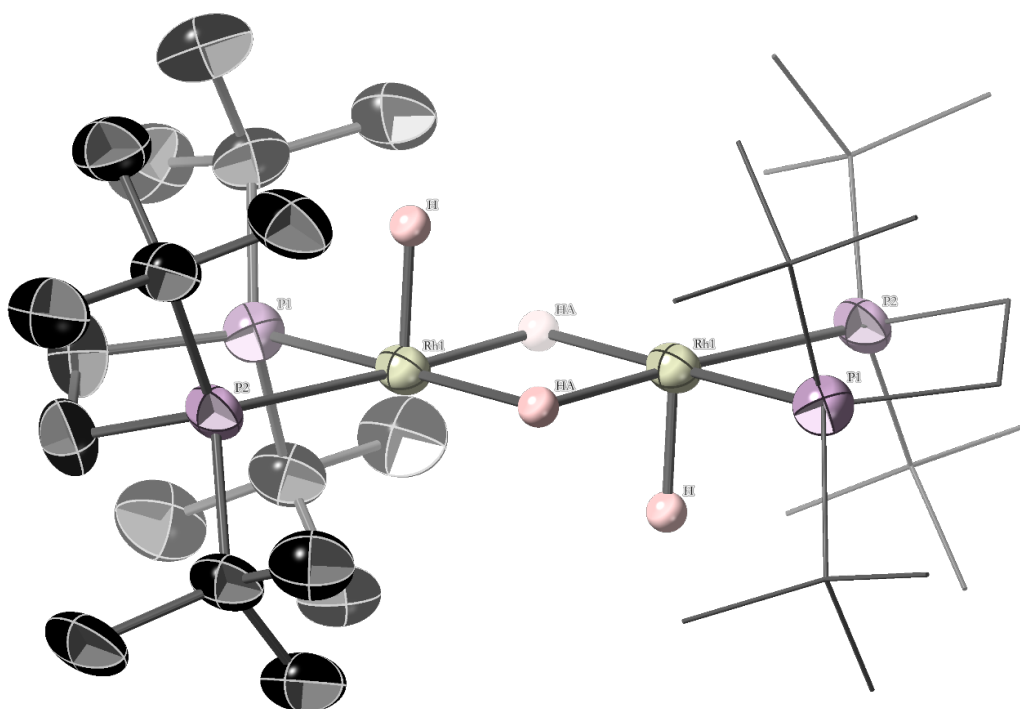

Figure S58: Major disordered component (97%) of cationic fragment  $\{[(dtbpe)RhH(\mu-H)]_2\}^{2+}$  of **14**. 50% displacement ellipsoids. H atoms omitted for clarity excepting metal hydrides. Selected bond lengths (Å) and angles (deg): Rh1–H, 1.42(4); Rh1–HA, 1.74(5); Rh1–P2, 2.2809(7); Rh1–P1, 2.2973(8); P2–Rh1–H, 92.5(16); P1–Rh1–H, 93.8(19); P2–Rh1–HA, 96.7(14); P1–Rh1–HA, 96.3(17).

## S4 Solid-Gas Chemistry with Single-Crystalline Molecular Organometallics, In Batch

### S4.1 Optimisation of Conditions: Solid-State Hydrogenation of Single-Crystalline Complex 7

A series of high-pressure NMR tubes fitted with Young's taps were each charged with fine crystalline **7** (c. 5 mg). The atmospheres of each tube were evacuated and replaced with H<sub>2</sub> for time  $t$  (1 bar) before evacuation and distillation of CD<sub>3</sub>CN into the headspace. Upon melting and displacement of weakly-bound NBA with CD<sub>3</sub>CN to give the acetonitrile complex, <sup>1</sup>H and <sup>31</sup>P{<sup>1</sup>H} NMR studies were conducted at 298 K. The CD<sub>3</sub>CN adduct is known in the form of the triflate [(dtbpe)Rh(NCCH<sub>3</sub>)] [OTf].<sup>16</sup> Conversion surpassed 95% by  $t = 20$  min.

### S4.2 Solid-Gas Catalytic Isomerisation of 1-butene

#### S4.2.1 NMR-Scale Solid-Gas Catalytic Isomerisation of Butenes with SMOMs

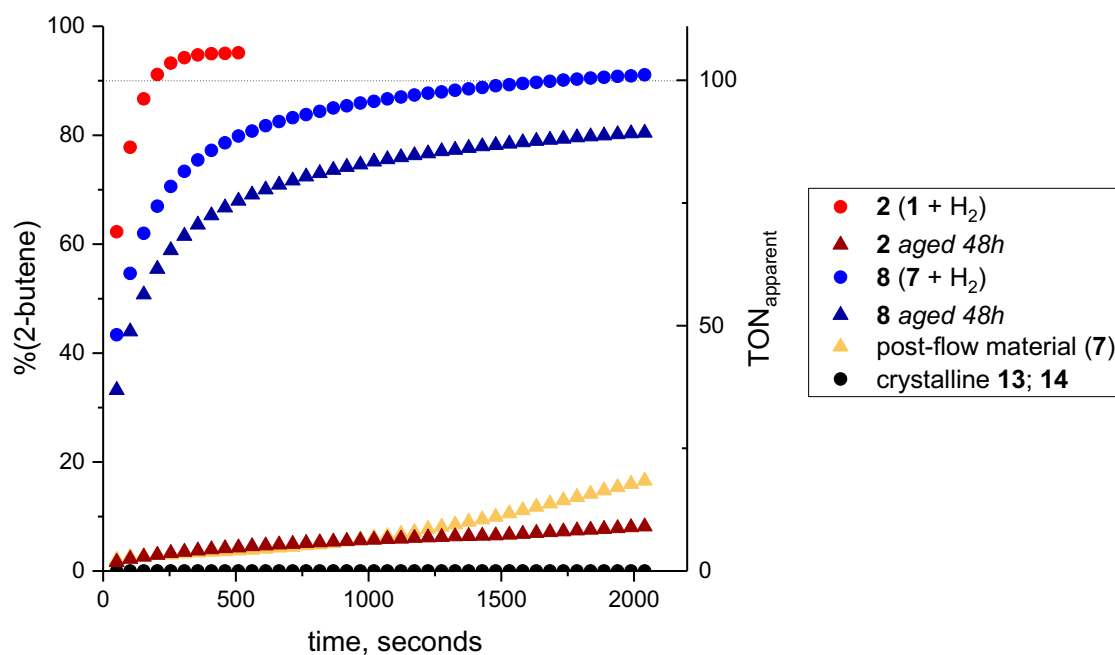

Figure S59: Conversion of starting pure 1-butene to 2-butenes over time by crushed samples (2 mg, c. 1.8  $\mu$ mol), as well as post-flow material approximately corresponding to 2 mg of organometallic, within a high-pressure NMR tube.  $p = 1$  bar,  $T = 298$  K,  $V_{\text{NMR}} = 2$  mL (c. 90  $\mu$ mol 1-butene). Percentages computed from gas-phase <sup>1</sup>H NMR integrals.

A sample of finely powdered single-crystalline complex **7** (1 mg) was introduced to a series of high-pressure NMR tubes ( $V = 2$  mL) fitted with Young's taps (controlled atmosphere valves). The tubes were evacuated, re-pressurised with H<sub>2</sub> (1 bar), and left for 45 min at room temperature.

Following this, the tube was evacuated and re-pressurised with a pure butene isomer atmosphere ( $p = 1$  bar; 1-butene, *cis*-2-butene, *trans*-2-butene) for the specified time, after which the atmosphere was withdrawn into the GC dilution glassware as previously detailed (see Section 1) before gas chromatography on each sample was undertaken.

A near-thermodynamic distribution of isomers was obtained regardless of the starting straight-chain isomer of butene (Figure S60). Halting the reaction after 2 min, however, results in incomplete conversion of 1-butene (<50%) and a reversed *cis*-*trans* ratio. The reversed *cis*-*trans* ratio is similarly seen under flow conditions (see below).

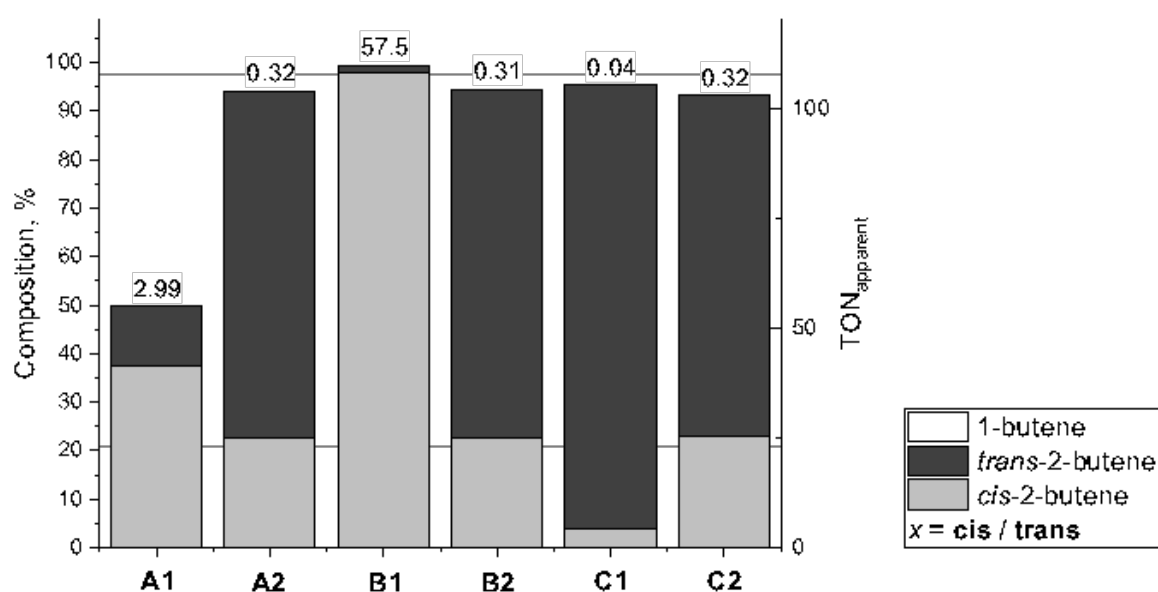

Figure S60: Conversion of the starting pure butene isomer to a mixture of straight-chain butene isomers over time (A, 1-butene; B, *cis*-2-butene; C, *trans*-2-butene; 1,  $t = 2$  minutes; 2,  $t = 24$  hours) by a crushed and hydrogenated single crystalline sample of **7** (1 mg, c.  $0.9 \mu\text{mol}$ ) within a high pressure NMR tube, with proportions of, 1-, *cis*-2- and *trans*-2-butene detailed as calculated from GC analysis. The expected thermodynamic proportions<sup>17</sup> of each isomer are also shown as reference lines (20.9% *cis*-2-butene, 76.8% *trans*-2-butene ( $\Sigma = 97.7\%$ ), 2.3% 1-butene).  $p = 1$  bar,  $T = 298$  K,  $V_{\text{NMR}} = 2$  mL (c.  $90 \mu\text{mol}$  1-butene).

#### S4.2.2 Large-Scale Batch Solid-Gas Catalytic Isomerisation of 1-butene with Complex **7**

A single crystal of **7** (c. 1 mg) was placed inside a c. 75 mL reactor vessel fitted with two Young's taps, the second of these in turn connected to a junction where an NMR tube adapter and a third Young's tap were fitted (Figure S61). The vessel was evacuated and placed under a pressure of  $\text{H}_2$  (1 bar) for 45 min, after which this atmosphere was evacuated and replaced with 1-butene ( $p = 1.4$  bar). Every 24 hours, an aliquot of gas was removed into a high-pressure NMR tube fitted with a Young's tap, to be analysed by gas-phase  $^1\text{H}$  NMR and gas chromatography. After this, the atmosphere of butene was removed and recharged.

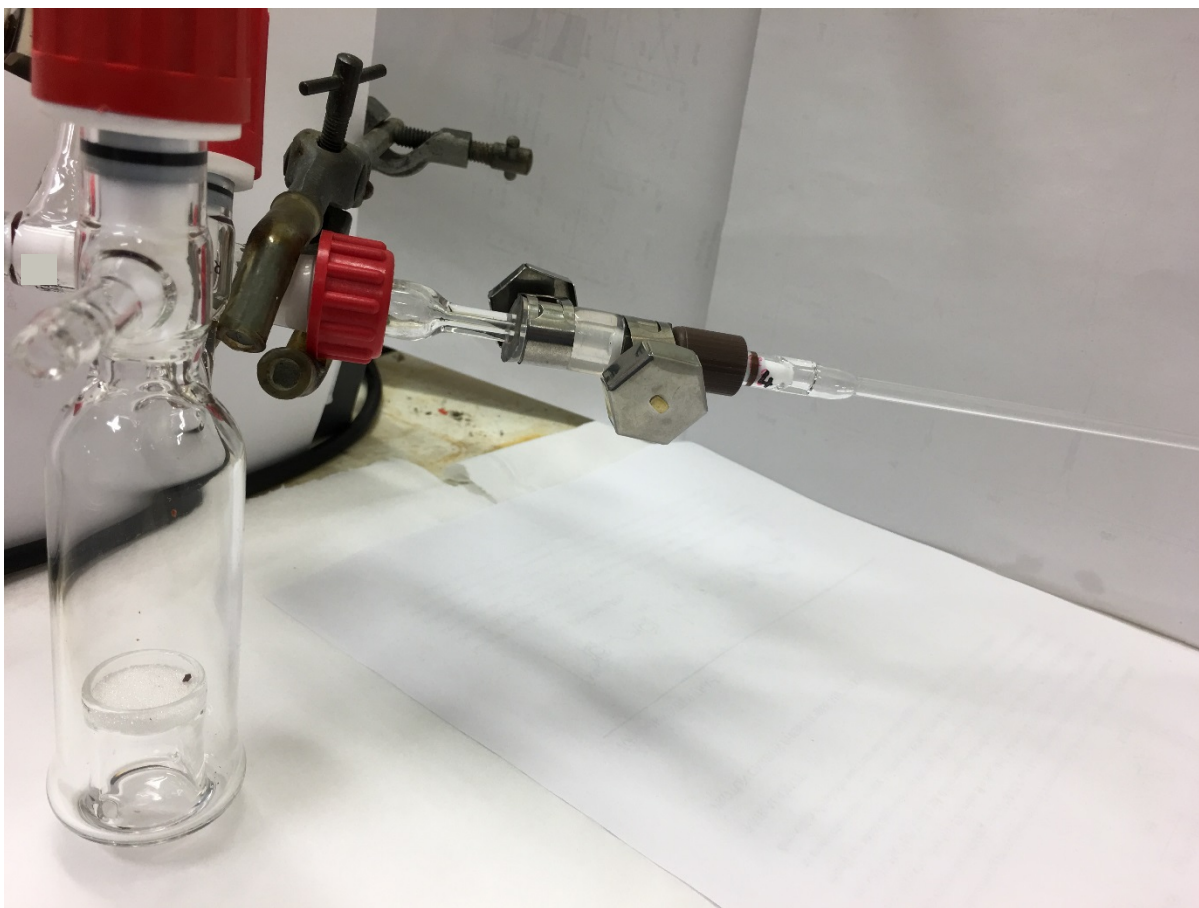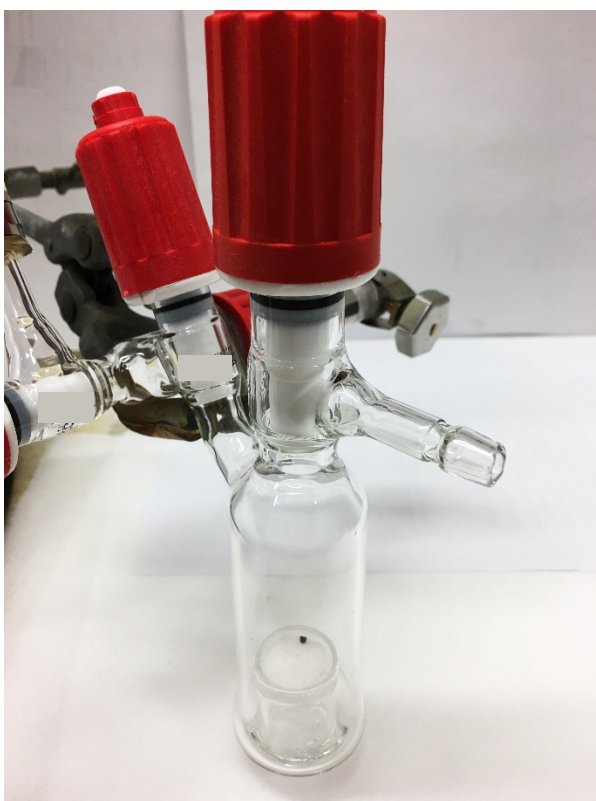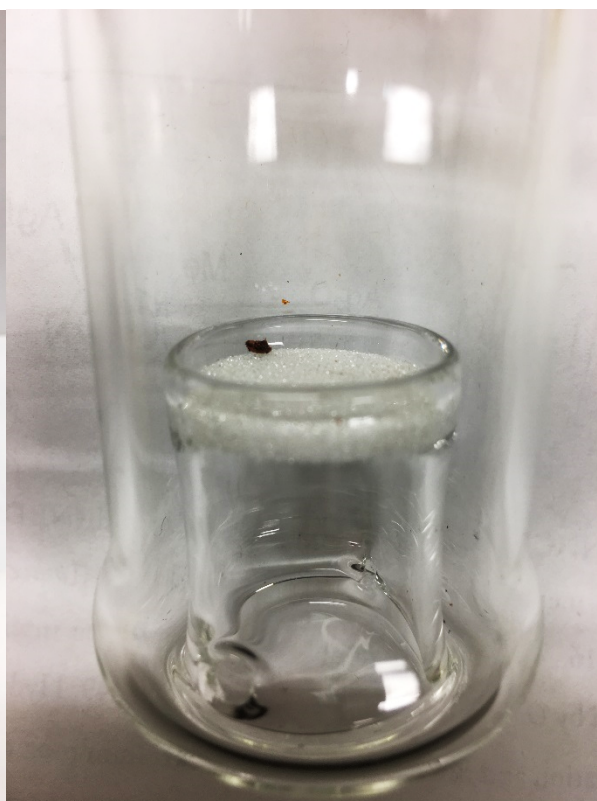

Figure S61: Custom reactor vessel, with high-pressure NMR tube fitted (top), and mounted single-crystal detailed (bottom right).

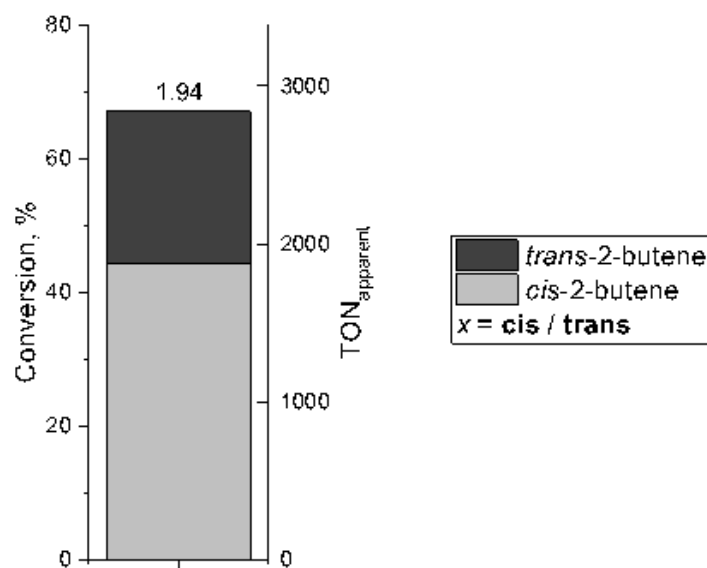

Figure S62: Conversion of 1-butene to 2-butene after 24 hours by a hydrogenated single crystal of complex **7** (1 mg, c. 0.9  $\mu\text{mol}$ ) within a bespoke reactor vessel, with proportions of cis- and trans-2-butene detailed as calculated from GC analysis.  $p = 1.4$  bar,  $T = 298$  K,  $V_{\text{reactor}} \sim 75$  mL (c. 4,250  $\mu\text{mol}$  1-butene).

Under these conditions, a clear bias towards *cis*-2-butene is demonstrated, indicating that on this scale 24 hours is not sufficient time to achieve thermodynamic equilibrium. The first charge is presented in *Figure S62*.



### S4.3 *In Situ* Solid-State NMR Studies versus X-ray Diffraction Studies 7; 8; 10/11

Complexes **8** and **10/11** (from complex **7**) were prepared *in situ* inside a 100  $\mu$ l solid-state NMR rotor and interrogated by solid-state  $^{31}\text{P}\{^1\text{H}\}$  and  $^{13}\text{C}\{^1\text{H}\}$  NMR spectroscopy at each stage. The results were compared with **7** and its respective low-angle and high-angle Bragg reflections, as achieved from the appropriate single crystal X-ray diffraction experiments (Figure S63).

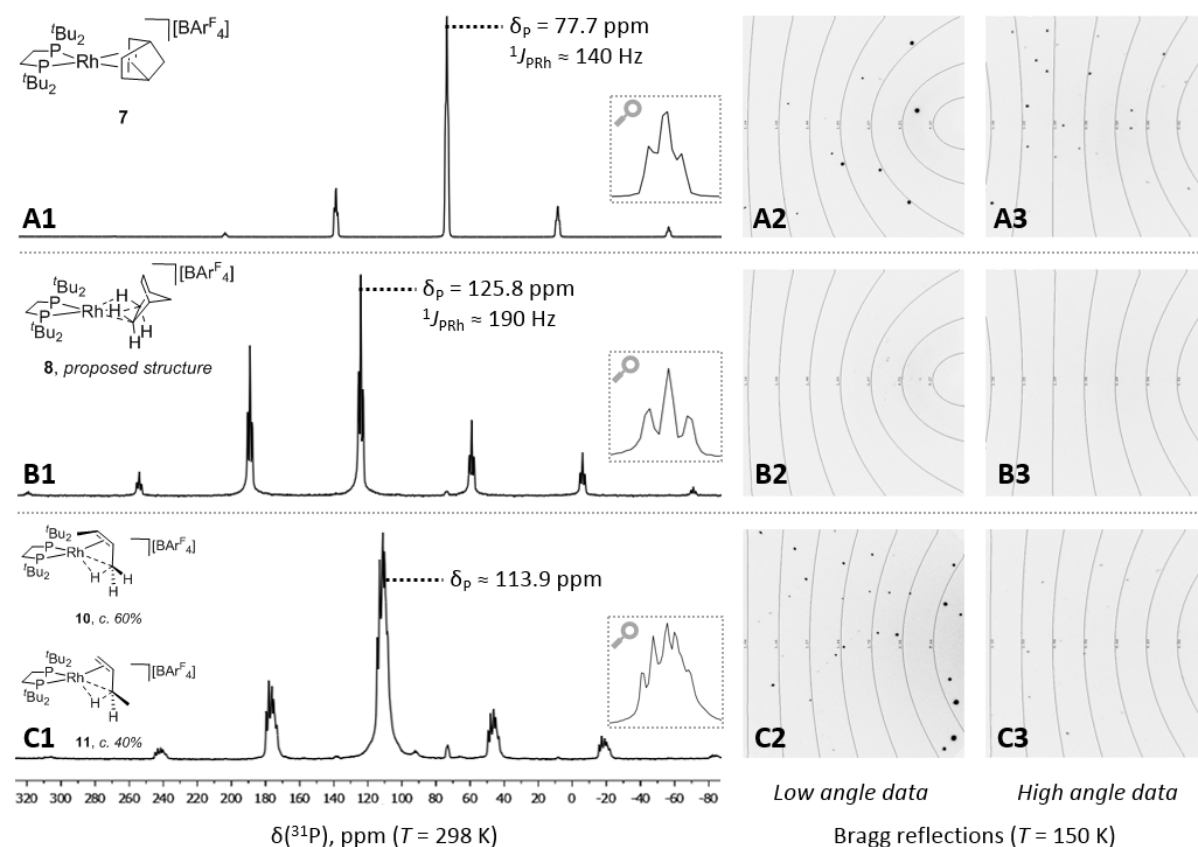

Figure S63:  $^{31}\text{P}\{^1\text{H}\}$  SSNMR spectra ( $\nu = 10$  kHz) of complexes **7** (A1), **8** (B1), and **10/11** (C1) compared with frames showing the Bragg reflections of complexes **7** (A2-3), **8** (B2-3), and **10/11** (C2-3).

It is apparent that while diffraction is lost and subsequently regained *via* hydrogenation and subsequent exposure to 1-butene, short-range order is maintained throughout the process, as determined by  $^{31}\text{P}\{^1\text{H}\}$  solid-state NMR spectroscopy.

## S5 Solid-Gas Chemistry with Single-Crystalline Molecular Organometallics, In Flow

### S5.1 Solution-Phase NMR Characterisation of Post-Flow Material, Complex 1

After catalysis in flow, columns into which complex **1** (15 mg) had been packed were unpacked of their contents inside a glovebox. It was noted that the material had significantly reddened over the course of the experiment. Post-flow samples of glass wool mixed with organometallic were loaded into NMR tubes fitted with Young's taps. CD<sub>2</sub>Cl<sub>2</sub> was distilled into the headspace of these tubes, and the tubes were shaken so as to dissolve the organometallic.

<sup>31</sup>P{<sup>1</sup>H} NMR analysis was then undertaken at 298 K, revealing a doublet at  $\delta_P = 81.9$  ppm ( $^2J_{PRh} = 169$  Hz), indicative of the butadiene complex **5**. This is consistent with experiments in batch.<sup>23</sup>

### S5.2 Solution-Phase NMR, Solid-State NMR, Mass Spectrometric, Powder X-ray Diffraction, and SEM Characterisation of Post-Flow Material, Complex 7

As above, columns into which complex **7** (15 mg) had been packed, reporting a <2% conversion at the end of an experiment after c. 100 hours on stream at 6.4 mL min<sup>-1</sup> 1-butene (2% in N<sub>2</sub>) and 1.2 mL min<sup>-1</sup> isobutene (2% in N<sub>2</sub>), were unpacked of their contents inside a glovebox. Material which had only been run for one hour at the same flow rates was also unpacked. Both sets of material had been pressurised under H<sub>2</sub> (1 bar) for 10 min.

#### S5.2.1 Mass Spectrometry

Samples of glass wool mixed with organometallic were soaked in CH<sub>2</sub>Cl<sub>2</sub> (neat) and CH<sub>2</sub>Cl<sub>2</sub> (c. 1% CH<sub>3</sub>CN) from which mass spectra were obtained. In this case, the inactive compounds produced in flow appeared to decompose immediately in neat CH<sub>2</sub>Cl<sub>2</sub> solution, producing a similar decomposition pattern to the butenes complexes **10/11** at 298 K.

#### S5.2.2 Solution-Phase <sup>31</sup>P{<sup>1</sup>H} NMR Spectroscopy

Material which had been on-stream for one hour and c. 100 hours was loaded into NMR tubes fitted with Young's taps. CD<sub>2</sub>Cl<sub>2</sub> was distilled into the headspace of these tubes such that <sup>31</sup>P{<sup>1</sup>H} NMR studies could be undertaken at 183 K (*Figure S64*).

For the post-flow (c. 100 hours on stream) material, a range of Rh-bound products were observed between  $\delta_P = 40$ –120 ppm.

The <sup>31</sup>P{<sup>1</sup>H} resonance visible at  $\delta_P \sim 115$  ppm suggested the butene (**10/11**)/isobutene complexes;  $\delta_P \sim 86$  ppm suggested a minority of NBD complex **7**. Otherwise, the resonances observed did not correspond to any complex hitherto synthesised. These resonances converged to C-Cl activation product **12** after 72 hours in solution at 298 K.

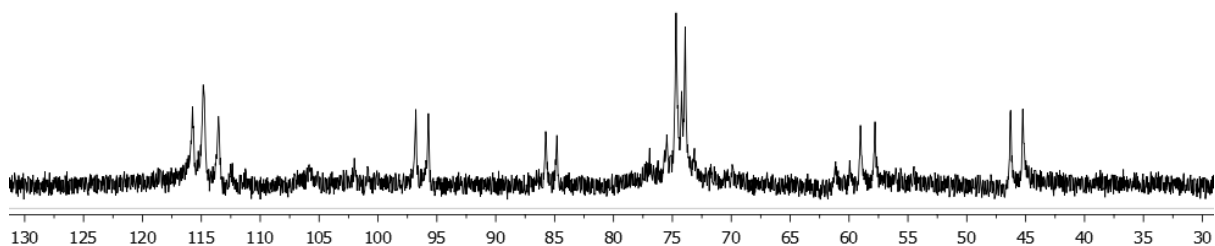

Figure S64: An exemplar  $^{31}\text{P}\{^1\text{H}\}$  NMR spectrum of post-flow (c. 100 hours on-stream) material (162 MHz, 183 K,  $\text{CD}_2\text{Cl}_2$ ).

Quenching post-flow (c. 100 hours on-stream) material with 1,2-difluorobenzene, followed by resting at 298 K for 4 hours before  $^{31}\text{P}\{^1\text{H}\}$  NMR spectroscopy was undertaken, revealed conversion to 1,2-difluorobenzene complex **9** (Figure S65).

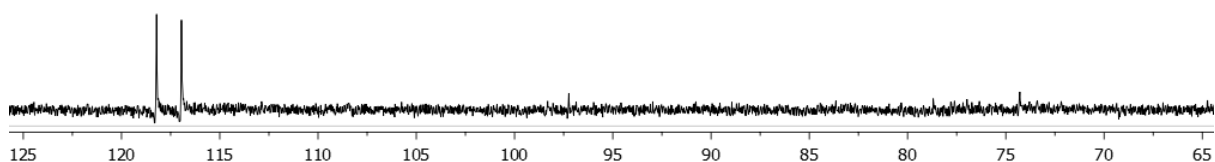

Figure S65: An exemplar  $^{31}\text{P}\{^1\text{H}\}$  NMR spectrum of post-flow (c. 100 hours on-stream) material (162 MHz, 298 K, 1,2-difluorobenzene).

Material which had only been on-stream for one hour, when dissolved in  $\text{CD}_2\text{Cl}_2$  at 183 K, gave a range of products not including the butene (**10/11**)/isobutene complexes, also ultimately converging to the C-Cl activation product **12** after 72 hours in solution at 298 K.

### S5.2.3 Solid-State $^{31}\text{P}\{^1\text{H}\}$ NMR Spectroscopy

Material which had only been on-stream for one hour, when interrogated by  $^{31}\text{P}\{^1\text{H}\}$  solid-state NMR at 298 K, confirmed the presence of a majority of NBA complex **8**, accompanied by incipient butenes (**10/11**)/isobutene complexes and a minority of unreacted **7** (Figure S66).

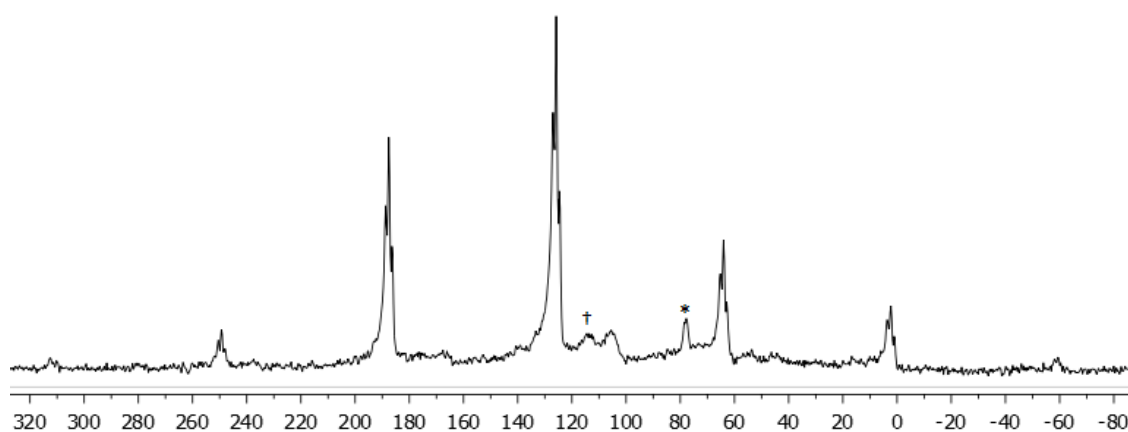

Figure S66:  $^{31}\text{P}\{^1\text{H}\}$  SSNMR spectrum of material on-stream for one hour (161.9 MHz, spinning speed 10 kHz, 298 K). \* indicates unreacted **7**, † **10/11**.

Post-flow (c. 100 hours on-stream) material, when interrogated *via*  $^{31}\text{P}\{^1\text{H}\}$  solid-state NMR, revealed a mixture of products with three major components, at  $\delta_{\text{P}} \sim 113$ , 78 and 71 ppm (Figure S67). The first likely corresponds to butenes complexes **10/11**, and the third to a complex hitherto unknown.  $\delta_{\text{P}} \sim 78$  ppm, a relatively sharp peak, suggests NBD complex **7**. Compared to the minor presence of this resonance in the  $^{31}\text{P}\{^1\text{H}\}$  SSNMR for material on-stream for one hour (Figure S66), this suggests the loss of short-range order in the bulk of the sample.

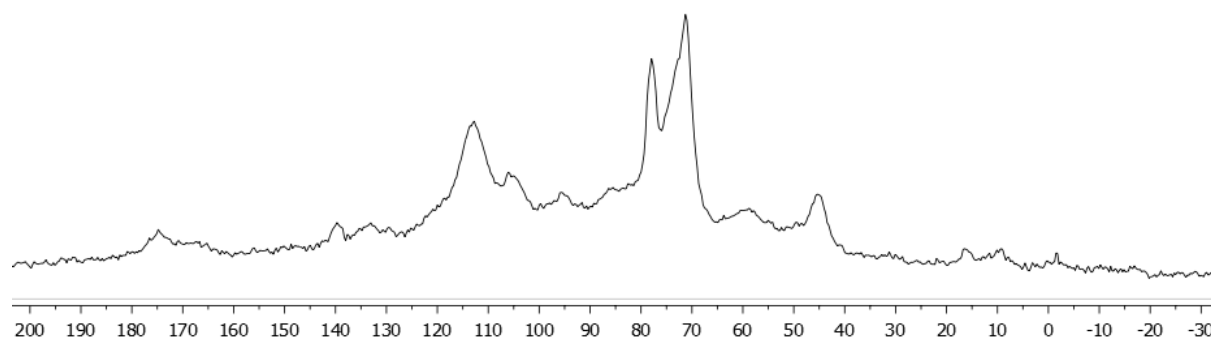

Figure S67:  $^{31}\text{P}\{^1\text{H}\}$  SSNMR spectrum of post-flow material on-stream for c. 100 hours (161.9 MHz, spinning speed 10 kHz, 298 K).

#### S5.2.4 Powder X-ray Diffraction

Due to the dilute nature of the organometallic/glass wool combination used in flow, flow conditions were simulated *ex situ* on neat samples, or conducted on crushed crystalline **7** in flow with glass wool plugs only present to enclose the sample (i.e. to avoid diluting the sample with glass wool). *Ex situ* samples were prepared as follows: crushed crystalline **7** (c. 25 mg) was introduced to a Young's flask (volume c. 60–100 mL) before evacuation, hydrogenation (1 bar, 45 min), evacuation, and re-pressurisation with 1-butene (1 bar). The simulated ageing process took place over the course of four days with the 1-butene atmosphere recharged twice every 24 hours for a total of at least eight recharges. On the fourth day, the atmosphere was evacuated and replaced with argon. The resulting material was then interrogated by powder x-ray diffraction, alongside a sample of unreacted crushed **7** of equal mass. Post-flow samples were prepared as follows: in a glovebox, a column was packed with a glass wool plug before crushed crystalline **7** (c. 30 mg) was introduced *without* glass wool segmentation as normal, followed by another glass wool plug. This column was then ran as above until activity registered <2% conversion, before unpacking inside a glovebox. The material received from the unpacked column, having removed any uncoated glass wool, was then interrogated by powder x-ray diffraction. The results are presented on the following page (Figure S68). While some peaks are retained, some broadening/loss of information is apparent from **7** (measured, **B**) to the material aged *ex situ* (**C**) as produced above, suggesting a reduction in crystallinity. This phenomenon is observed more severely for the material achieved post-flow (**D**), with almost total loss of information after 100 hours on-stream.

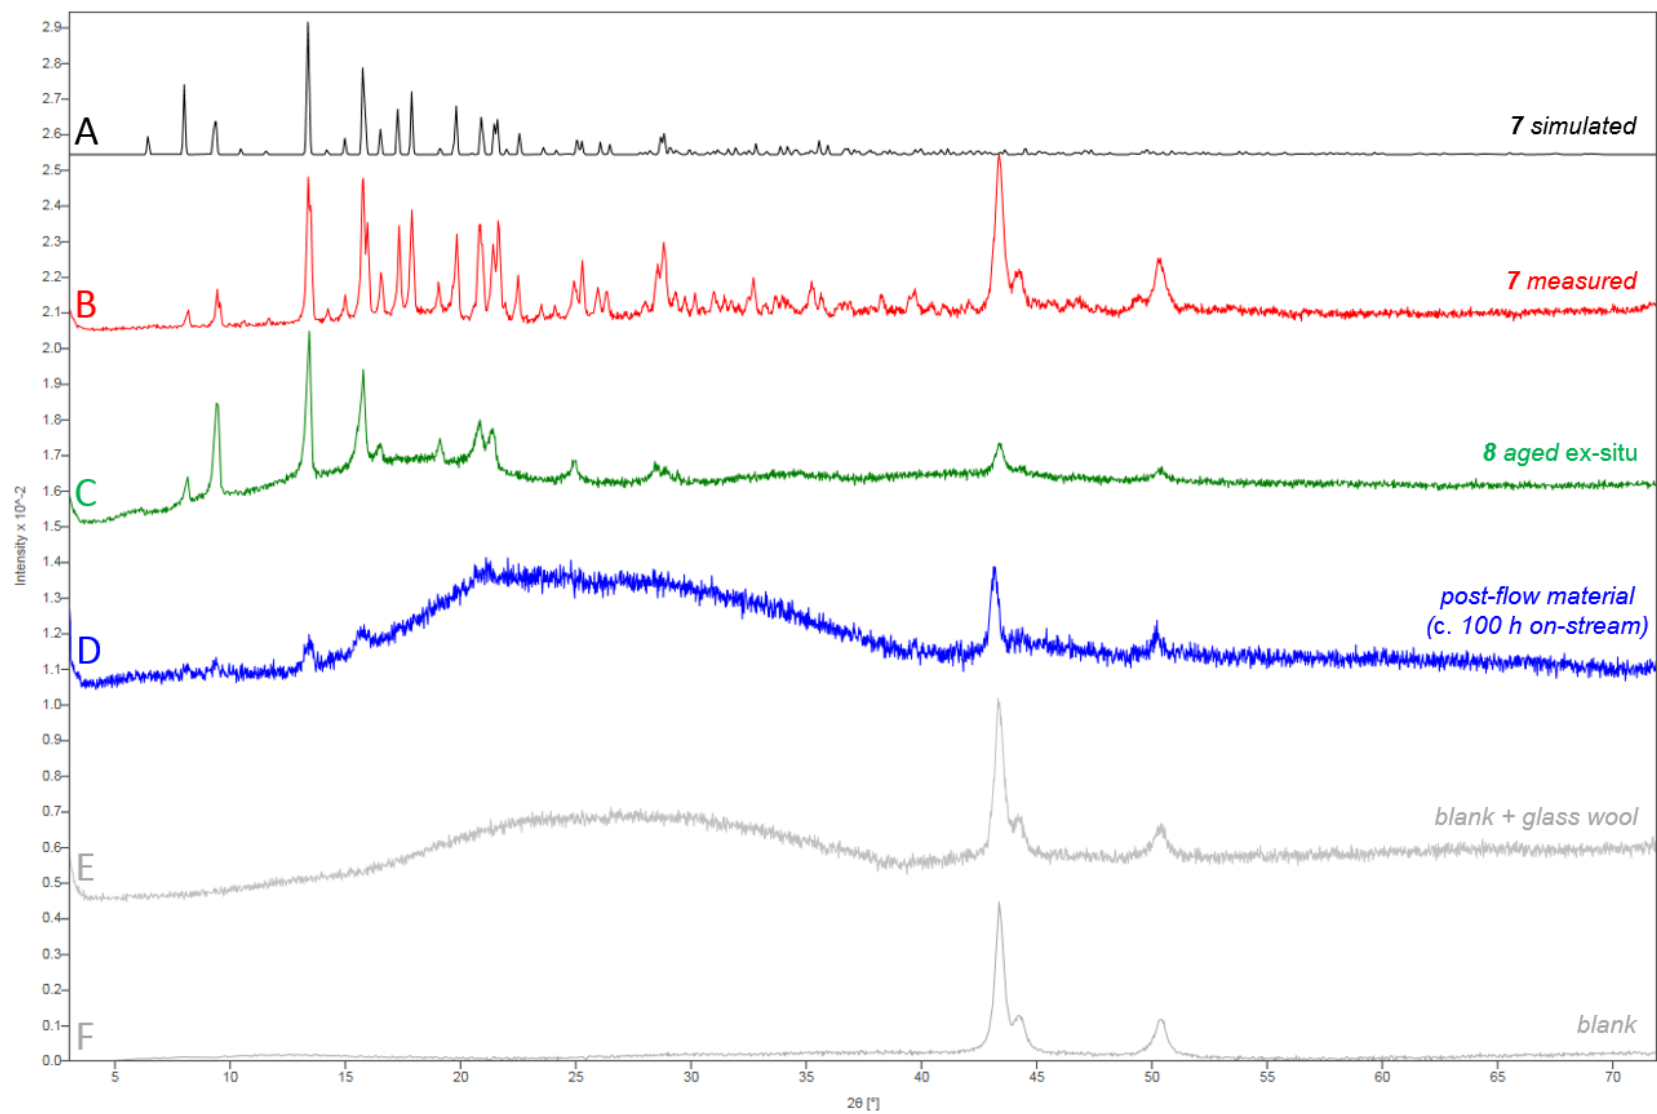

Figure S68: Powder x-ray diffraction patterns of complex **7** (simulated, **A**; measured **B**), complex **8** aged ex situ as detailed in the text (**C**), unpacked post-flow material (c. 100 hours on-stream, **D**), and a blank sample holder (with glass wool, **E**, and without, **F**).

### S5.2.5 Scanning Electron Microscopy

Post-flow (c. 100 hours on stream) and one-hour material, alongside material intended for flow that had *not* been exposed to H<sub>2</sub> or 1-butene, were all analysed *via* SEM (Figure S69, Figure S70). Organometallic material was unambiguously differentiated from glass wool using EDX. The materials were visibly different under SEM.

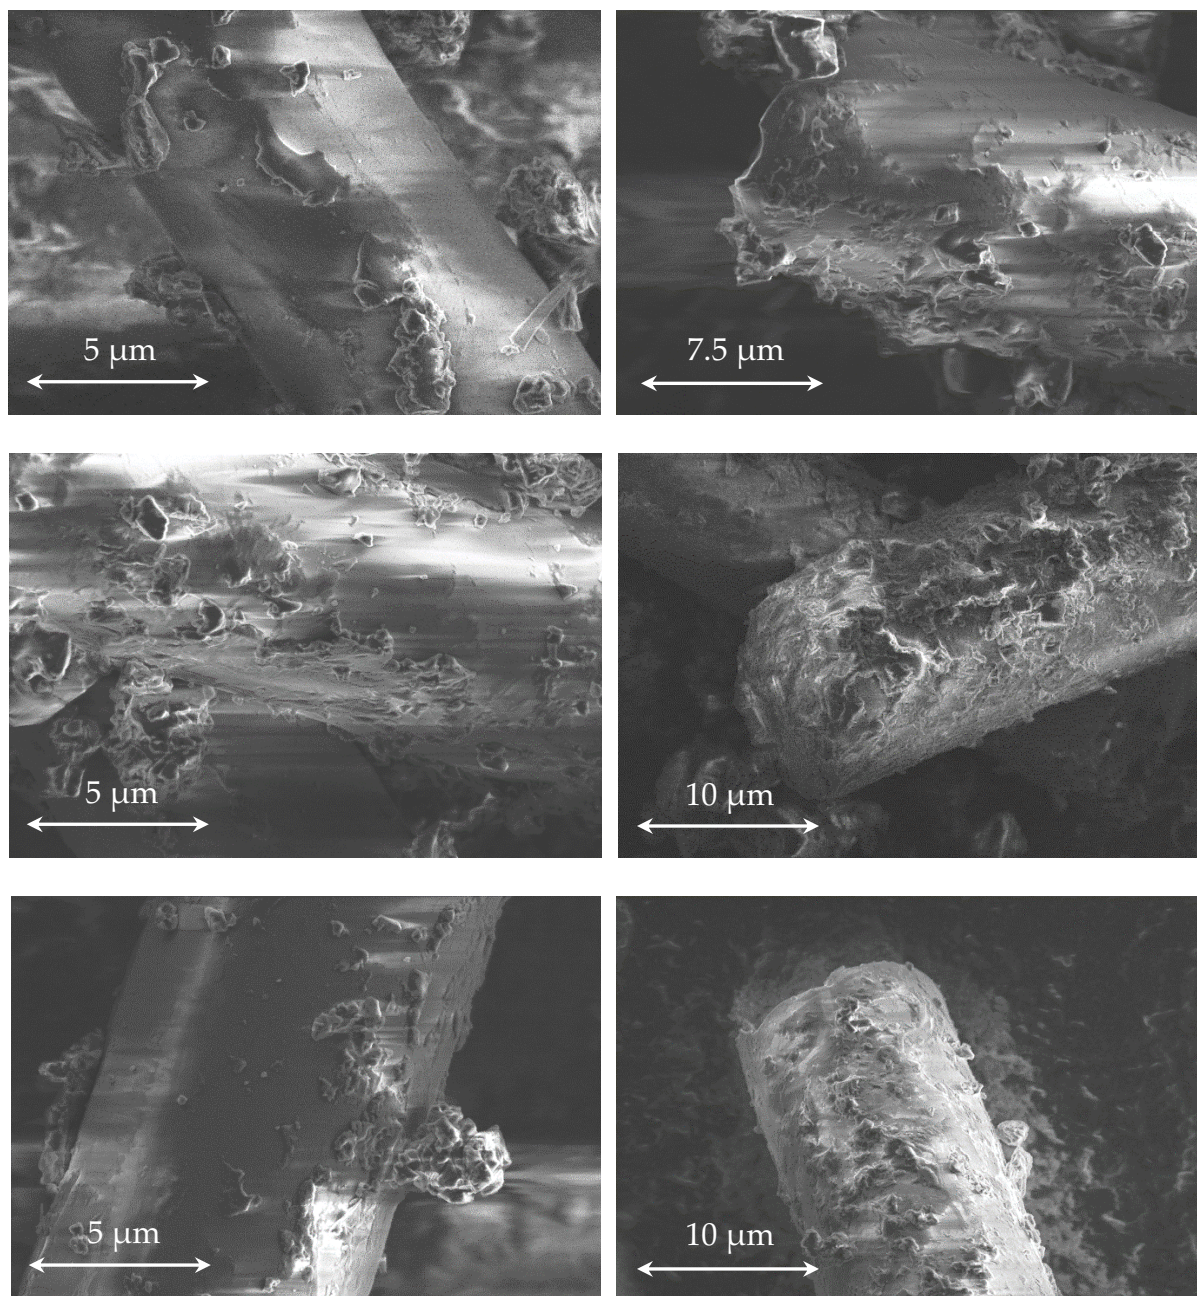

Figure S69: Scanning electron microscopy on post-flow (c. 100 hours on-stream) material.

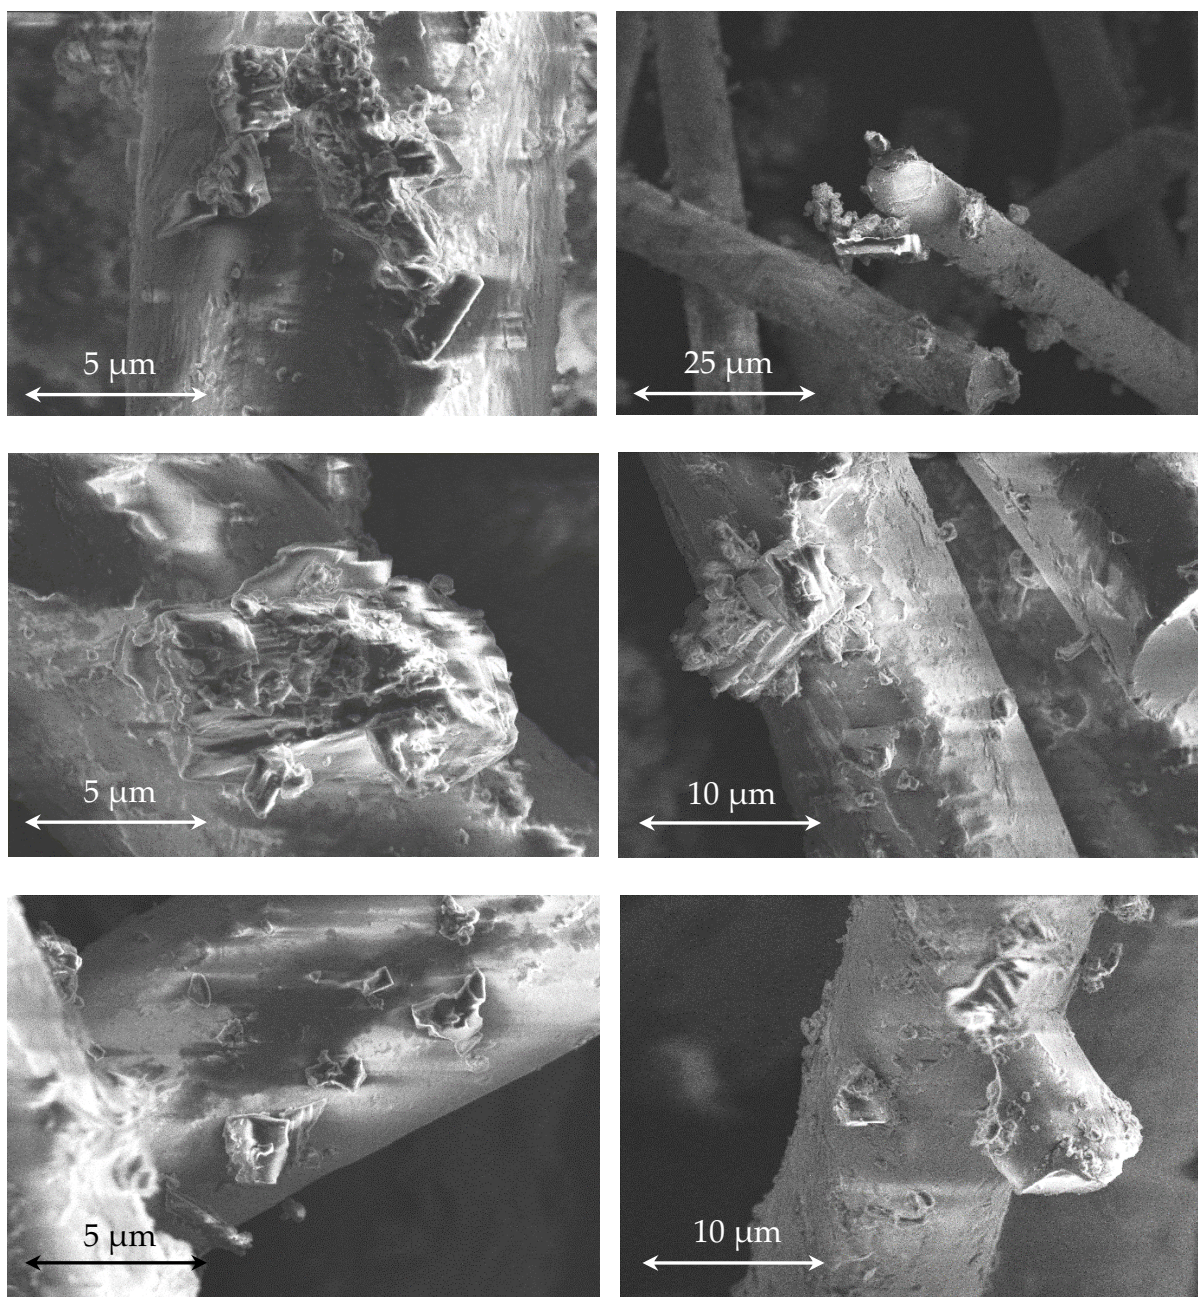

Figure S70: Scanning electron microscopy on one hour on-stream material.

Post-flow organometallic (Figure S69) appeared poorly-defined. Most crystallites possessed smoothed edges, of which there were few examples  $>5\ \mu\text{m}$  across. Moreover, organometallic appeared to have spread out and coated much of the glass surface.

One hour on-stream organometallic (Figure S70) and unexposed organometallic (Figure S71) were mostly in the form of well-defined, distinct crystallites, many of them large ( $\varnothing$  5–25  $\mu\text{m}$  across). Furthermore, unexposed organometallic contained numerous examples of very large ( $>25\ \mu\text{m}$ ) crystallites. On-stream crystallites appeared occluded or damaged compared to similar-sized examples among unexposed crystallites. This is congruent with observations of crystal fracturing upon hydrogenation (see Section S2).

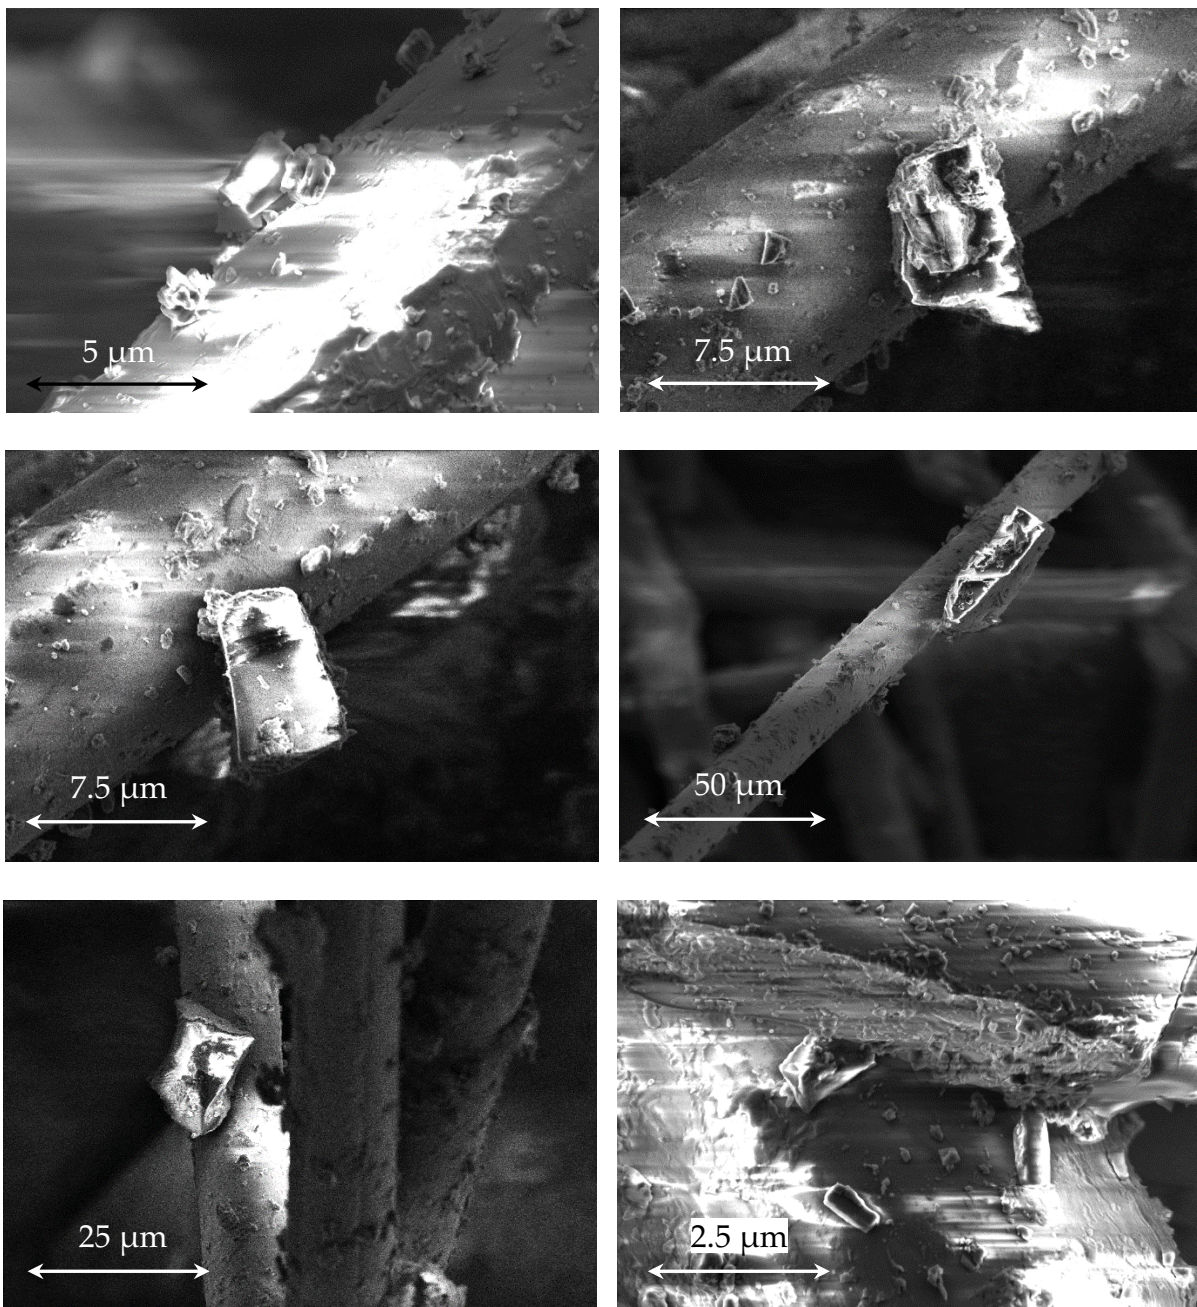

Figure S71: Scanning electron microscopy on material that had not been exposed to either  $\text{H}_2$  or 1-butene.



### S5.3 Continuous Flow Data: 1-Butene Isomerisation Catalysis by Complex 7 (90+ Hours on Stream)

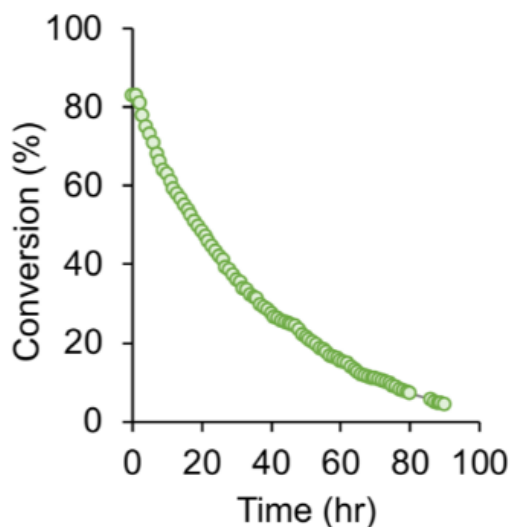

Figure S72: On stream catalytic performance of 1-butene isomerisation catalysis in solid/gas flow, 298 K, 1 atm, complex 7 (15 mg, pre-activated with  $H_2$  for 10 minutes – see Section S1). Data plotted are total 2-butenes (GC conversion). 1-butene (2% in  $N_2$ ,  $6.4 \text{ mL min}^{-1}$ )/isobutene co-feed (2% in  $N_2$ ,  $1.2 \text{ mL min}^{-1}$ , 15% relative to 1-butene).

### S5.4 Reproducibility Studies Under Continuous Flow Conditions, Complex 1

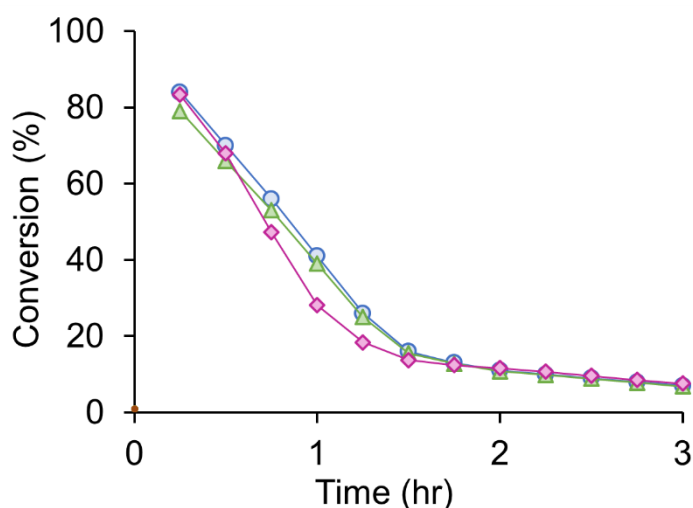

Figure S73: On stream catalytic performance of 1-butene isomerisation catalysis in solid/gas flow, 298 K, 1 atm: three separate experimental catalytic runs of 1-butene isomerisation under continuous flow conditions from three different batches of pre-catalyst complex 1 (6 mg, pre-activated with  $H_2$  for 10 minutes – see Section S1) by three different operators. Data plotted are total 2-butenes (GC conversion). 1-butene (2% in  $N_2$ ,  $6.4 \text{ mL min}^{-1}$ )/isobutene co-feed (2% in  $N_2$ ,  $1.2 \text{ mL min}^{-1}$ , 15% relative to 1-butene).

The reproducibility of the column pack methodology and the experimental procedure is highlighted in *Figure S73* above. Three separate catalytic runs were conducted by three separate users using three different batches of the pre-catalyst (complex **1**).

### S5.5 Particle Size Studies Under Continuous Flow Conditions, Complex **1**

The effects of the particle size of the pre-catalyst (complex **1**) is demonstrated in *Figure S74* below. The particle sizes were separated using Endecott sieves.

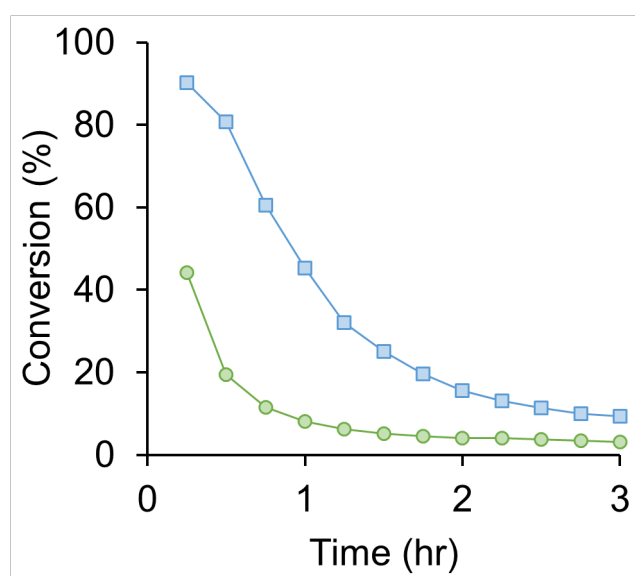

*Figure S74: On stream catalytic performance of 1-butene isomerisation catalysis in solid/gas flow, 298 K, 1 atm, complex **1** (6 mg, pre-activated with H<sub>2</sub> for 10 minutes – see Section S1). Data plotted are total 2-butenes (GC conversion). 1-butene (2% in N<sub>2</sub>, 6.4 mL min<sup>-1</sup>)/isobutene co-feed (2% in N<sub>2</sub>, 1.2 mL min<sup>-1</sup>, 15% relative to 1-butene). Particle sizes <150 μm across (blue squares); ≥150 μm across (green circles).*

## S6 References

- (1) Pike, S. D.; Chadwick, F. M.; Rees, N. H.; Scott, M. P.; Weller, A. S.; Krämer, T.; Macgregor, S. A. Solid-State Synthesis and Characterization of  $\sigma$ -Alkane Complexes,  $[\text{Rh}(\text{L}_2)(\eta^2, \eta^2\text{-C}_7\text{H}_{12})][\text{BARF}_4]$  ( $\text{L}_2$  = Bidentate Chelating Phosphine). *J. Am. Chem. Soc.* **2015**, *137* (2), 820–833. <https://doi.org/10.1021/ja510437p>.
- (2) Chadwick, F. M.; McKay, A. I.; Martinez-Martinez, A. J.; Rees, N. H.; Krämer, T.; Macgregor, S. A.; Weller, A. S. Solid-State Molecular Organometallic Chemistry. Single-Crystal to Single-Crystal Reactivity and Catalysis with Light Hydrocarbon Substrates. *Chem. Sci.* **2017**, *8* (9), 6014–6029.
- (3) Martínez-Martínez, A. J.; Tegner, B. E.; McKay, A. I.; Bukvic, A. J.; Rees, N. H.; Tizzard, G. J.; Coles, S. J.; Warren, M. R.; Macgregor, S. A.; Weller, A. S. Modulation of  $\sigma$ -Alkane Interactions in  $[\text{Rh}(\text{L}_2)(\text{Alkane})]^+$  Solid-State Molecular Organometallic (SMOM) Systems by Variation of the Chelating Phosphine and Alkane: Access to  $\eta^2, \eta^2$ - $\sigma$ -Alkane Rh(I),  $\eta^1$ - $\sigma$ -Alkane Rh(III) Complexes, and Alkane Encapsulation. *J. Am. Chem. Soc.* **2018**, *140* (44), 14958–14970.
- (4) Giordano, G.; Crabtree, R. H.; Heintz, R. M.; Forster, D.; Morris, D. E. Di- $\mu$ -Chloro-Bis( $\eta^4$ -1,5-Cyclooctadiene) Dirhodium (I). *Inorg. Synth.* **1979**, *19*, 218–220.
- (5) Pörschke, K.-R.; Pluta, C.; Proft, B.; Lutz, F.; Krüger, C. Bis(Di-Tert-Butylphosphino)Ethan-Nickel(0)-Komplexe / Bis(Di-Tert-Butylphosphino)Ethane-Nickel(0) Complexes. *Z. Naturforsch. B.* 1993, p 608.
- (6) Martínez-Martínez, A. J.; Weller, A. S. Solvent-Free Anhydrous  $\text{Li}^+$ ,  $\text{Na}^+$  and  $\text{K}^+$  Salts of  $[\text{B}(3,5\text{-(CF}_3)_2\text{C}_6\text{H}_3)_4]^-$ ,  $[\text{BARF}_4]^-$ . Improved Synthesis and Solid-State Structures. *Dalton Trans.* **2019**, *48* (11), 3551–3554.
- (7) Peersen, O. B.; Wu, X. L.; Kustanovich, I.; Smith, S. O. Variable-Amplitude Cross-Polarization MAS NMR. *J. Magn. Reson. Ser. A* **1993**, *104* (3), 334–339.
- (8) Earl, W. L.; Vanderhart, D. L. Measurement of  $^{13}\text{C}$  Chemical Shifts in Solids. *J. Magn. Reson.* **1982**, *48* (1), 35–54.
- (9) Pike, S. D.; Krämer, T.; Rees, N. H.; Macgregor, S. A.; Weller, A. S. Stoichiometric and Catalytic Solid–Gas Reactivity of Rhodium Bis-Phosphine Complexes. *Organometallics* **2015**, *34* (8), 1487–1497.
- (10) Lubben, A. T.; McIndoe, J. S.; Weller, A. S. Coupling an Electrospray Ionization Mass Spectrometer with a Glovebox: A Straightforward, Powerful, and Convenient Combination for Analysis of Air-Sensitive Organometallics. *Organometallics* **2008**, *27* (13), 3303–3306.
- (11) Cosier, J. t.; Glazer, A. M. A Nitrogen-Gas-Stream Cryostat for General X-Ray Diffraction Studies. *J. Appl. Crystallogr.* **1986**, *19* (2), 105–107.
- (12) VandeVondele, J.; Hutter, J. Gaussian Basis Sets for Accurate Calculations on Molecular

- Systems in Gas and Condensed Phases. *J. Chem. Phys.* **2007**, *127* (11), 114105.
- (13) Sheldrick, G. M. SHELXT—Integrated Space-Group and Crystal-Structure Determination. *Acta Crystallogr. Sect. A.* **2015**, *71* (1), 3–8.
- (14) Sheldrick, G. M. A Short History of SHELX. *Acta Crystallogr., Sect. A.* **2008**, *64* (1), 112–122.
- (15) Dolomanov, O. V.; Bourhis, L. J.; Gildea, R. J.; Howard, J. A. K.; Puschmann, H. OLEX2: A Complete Structure Solution, Refinement and Analysis Program. *J. Appl. Crystallogr.* **2009**, *42* (2), 339–341.
- (16) Whited, M. T.; Kosanovich, A. J.; Janzen, D. E. Synthesis and Reactivity of Three-Coordinate (Dtbpe)Rh Silylamides: CO<sub>2</sub> Bond Cleavage by a Rhodium(I) Disilylamide. *Organometallics* **2014**, *33* (6), 1416–1422.
- (17) Aston, J. G.; Szasz, G.; Woolley, H. W.; Brickwedde, F. G. Thermodynamic Properties of Gaseous 1,3-Butadiene and the Normal Butenes above 25°C Equilibria in the System 1,3-Butadiene, N-Butenes, and N-Butane. *J. Chem. Phys.* **1946**, *14* (2), 67–79.
